# Supplementary material for: Reduction of procedure times in routine clinical practice with Compressed SENSE magnetic resonance imaging technique
Source: PLoS One. 2019 Apr 12;14(4):e0214887. doi: 10.1371/journal.pone.0214887 (PMC6461228; doi:10.1371/journal.pone.0214887)
Supplement: S2 File — (XLSX) [file pone.0214887.s002.xlsx]

## Sheet: Tabelle1
Year	Exam no	Anatomical area	Coil	Exam time	ChangeOver time	Procedure time	Scan time	Inter-scan delay time	Non-scan time	Prepare time	Finish time	Room time	Series 1	Start 1	End 1	Scan time 1	Series 2	Start 2	End 2	Scan time 2	Series 3	Start 3	End 3	Scan time 3	Series 4	Start 4	End 4	Scan time 4	Series 5	Start 5	End 5	Scan time 5	Series 6	Start 6	End 6	Scan time 6	Series 7	Start 7	End 7	Scan time 7	Series 8	Start 8	End 8	Scan time 8	Series 9	Start 9	End 9	Scan time 9	Series 10
2017	11	Brain	sense_breast_7m_aci	23	0	23	22	1	1	7.6	62.9	93.5	CoilSurveyScan	16:14:59	16:15:06	0.1	SenseRefScan	16:15:11	16:15:21	0.2	SmartBrain	16:15:24	16:16:00	0.6	DWI_tra 3mm	16:16:30	16:19:02	2.5	FLAIR_3D_sag	16:19:05	16:24:20	5.2	SWIp	16:24:22	16:29:19	4.9	3D_T1_NATIV_mDIXON_sag	16:29:31	16:35:17	5.8	T2W_MV_XD_tra	16:35:20	16:37:58	2.6
2017	15	Brain	posterior	23.6	0	23.6	21.9	1.7	1.7	7.2	6.7	37.6	CoilSurveyScan	18:48:19	18:48:26	0.1	SenseRefScan	18:48:31	18:48:41	0.2	SmartBrain	18:48:44	18:49:19	0.6	DWI_tra 3mm	18:50:04	18:52:37	2.5	FLAIR_3D_sag	18:52:55	18:58:10	5.2	SWIp	18:58:13	19:03:09	4.9	3D_T1_NATIV_mDIXON_sag	19:03:12	19:08:53	5.7	T2W_MV_XD_tra	19:09:18	19:11:56	2.6
2017	12	Brain	nvc_base	23.7	0	23.7	22.1	1.6	1.6	3	23.7	50.4	CoilSurveyScan	17:08:37	17:08:44	0.1	SenseRefScan	17:08:48	17:08:58	0.2	SmartBrain	17:09:01	17:09:37	0.6	DWI_tra 3mm	17:10:36	17:13:17	2.7	FLAIR_3D_sag	17:13:20	17:18:34	5.2	3D_T1_NATIV_mDIXON_sag	17:18:58	17:24:39	5.7	SWIp	17:24:42	17:29:39	5	T2_MV_XD_tra	17:29:42	17:32:20	2.6
2017	14	Brain	sense_knee_16_aci	26.9	0	26.9	25.4	1.5	1.5	0.2	11.4	38.5	CoilSurveyScan	19:48:45	19:49:19	0.6	SenseRefScan	19:49:23	19:49:33	0.2	SmartBrain	19:49:37	19:50:12	0.6	DWI_tra 3mm	19:50:56	19:53:28	2.5	FLAIR_3D_sag	19:53:31	19:58:45	5.2	TOF_3D_tra	19:58:48	20:02:48	4	T2_mDIXON_cor	20:02:52	20:06:56	4.1	T1W_SE	20:06:59	20:12:36	5.6	T2_MV_XD_tra	20:13:03	20:15:41	2.6
2017	10	Brain	nvc_base	27.2	0	27.2	25	2.2	2.2	10.5	10.7	48.4	CoilSurveyScan	18:26:09	18:26:16	0.1	SenseRefScan	18:26:21	18:26:31	0.2	SmartBrain	18:26:34	18:27:10	0.6	DWI_tra 3mm	18:27:41	18:30:13	2.5	FLAIR_3D_sag	18:30:16	18:35:30	5.2	SWIp	18:35:48	18:40:45	4.9	T1_FFE_tra	18:40:48	18:44:01	3.2	T2_MV_XD_tra	18:45:06	18:47:44	2.6	3D_T1_KM_mDIXON_sag	18:47:47	18:53:23	5.6
2017	11	Brain	nvc_base	27.2	0	27.2	25.1	2.1	2.1	0.2	62.7	90	CoilSurveyScan	17:21:51	17:21:58	0.1	SenseRefScan	17:22:03	17:22:13	0.2	SmartBrain	17:22:16	17:22:52	0.6	DWI_tra 3mm	17:23:21	17:25:53	2.5	FLAIR_3D_sag	17:25:56	17:31:11	5.2	SWIp	17:31:14	17:36:11	4.9	T1_FFE_tra	17:36:14	17:39:30	3.3	T2_MV_XD_tra	17:40:44	17:43:22	2.6	3D_T1_KM_mDIXON_sag	17:43:25	17:49:02	5.6
2017	9	Brain	anterior	28.4	0	28.4	25.1	3.3	3.3	0.3	14.9	43.5	CoilSurveyScan	15:57:43	15:57:51	0.1	SenseRefScan	15:57:56	15:58:05	0.2	SmartBrain	15:58:09	15:58:44	0.6	DWI_tra 3mm	15:59:33	16:02:05	2.5	FLAIR_3D_sag	16:02:07	16:07:21	5.2	SWIp	16:07:25	16:12:22	5	T1_FFE_tra	16:12:25	16:15:40	3.3	T2W_MV_XD_tra	16:17:49	16:20:27	2.6	3D_T1_KM_mDIXON_sag	16:20:30	16:26:06	5.6
2017	10	Brain	sense_breast_7m_aci	28.6	0	28.6	25.6	3	3	3.4	6.4	38.4	CoilSurveyScan	18:42:28	18:43:02	0.6	SenseRefScan	18:43:07	18:43:17	0.2	SmartBrain	18:43:21	18:43:56	0.6	DWI_tra 3mm	18:44:16	18:46:48	2.5	FLAIR_3D_sag	18:46:51	18:52:05	5.2	SWIp	18:52:08	18:57:05	5	T1_FFE_tra	18:57:08	19:00:23	3.2	T2W_MV_XD_tra	19:02:01	19:04:39	2.6	3D_T1_KM_mDIXON_sag	19:05:25	19:11:04	5.6
2017	11	Brain	sense_knee_16_aci	29.1	0	29.1	25.2	4	4	0.6	152.6	182.3	CoilSurveyScan	16:22:57	16:23:04	0.1	SenseRefScan	16:23:08	16:23:18	0.2	SmartBrain	16:23:22	16:23:57	0.6	DWI_tra 3mm	16:24:31	16:27:03	2.5	FLAIR_3D_sag	16:27:06	16:32:21	5.2	SWIp	16:32:23	16:37:20	4.9	T1_FFE_tra	16:37:22	16:40:38	3.3	T2W_MV_XD_tra	16:43:43	16:46:21	2.6	3D_T1_KM_mDIXON_sag	16:46:24	16:52:05	5.7
2017	13	Brain	nvc_base	29.3	0	29.3	25.2	4	4	0.2	8.7	38.1	CoilSurveyScan	18:55:18	18:55:25	0.1	SenseRefScan	18:55:30	18:55:40	0.2	SmartBrain	18:55:43	18:56:19	0.6	DWI_tra 3mm	18:57:01	18:59:34	2.5	FLAIR_3D_sag	18:59:46	19:05:02	5.3	SWIp	19:05:21	19:10:17	4.9	T1_FFE_tra	19:10:20	19:13:34	3.2	T2W_MV_XD_tra	19:16:04	19:18:43	2.6	3D_T1_KM_mDIXON_sag	19:18:49	19:24:33	5.7
2017	12	Brain	posterior	29.7	0	29.7	25.4	4.3	4.3	2.1	64.5	96.3	CoilSurveyScan	17:05:37	17:05:44	0.1	SenseRefScan	17:05:48	17:05:58	0.2	SmartBrain	17:06:01	17:06:37	0.6	DWI_tra 3mm	17:07:06	17:09:41	2.6	SenseRefScan	17:09:43	17:09:53	0.2	FLAIR_3D_sag	17:09:58	17:15:12	5.2	SWIp	17:15:15	17:20:14	5	T1_FFE_tra	17:20:17	17:23:32	3.3	T2W_MV_XD_tra	17:26:56	17:29:34	2.6	3D_T1_KM_mDIXON_sag
2017	12	Brain	nvc_base	29.7	0	29.7	25.1	4.6	4.6	7.1	16.1	52.9	CoilSurveyScan	18:35:24	18:35:32	0.1	SenseRefScan	18:35:36	18:35:46	0.2	SmartBrain	18:35:49	18:36:25	0.6	DWI_tra 3mm	18:36:57	18:39:29	2.5	FLAIR_3D_sag	18:39:31	18:44:46	5.2	SWIp	18:45:21	18:50:17	4.9	T1_FFE_tra	18:50:19	18:53:34	3.2	T2W_MV_XD_tra	18:56:46	18:59:24	2.6	3D_T1_KM_mDIXON_sag	18:59:27	19:05:04	5.6
2017	15	Brain	nvc_base	30.6	0	30.6	25	5.6	5.6	0.2	8.4	39.2	CoilSurveyScan	18:49:00	18:49:07	0.1	SenseRefScan	18:49:11	18:49:20	0.2	SmartBrain	18:49:24	18:50:00	0.6	DWI_tra 3mm	18:50:31	18:53:03	2.5	FLAIR_3D_sag	18:53:06	18:58:20	5.2	SWIp	18:58:23	19:03:20	4.9	T1_FFE_tra	19:03:47	19:07:00	3.2	T2W_MV_XD_tra	19:11:21	19:13:59	2.6	3D_T1_KM_mDIXON_sag	19:14:02	19:19:35	5.6
2017	10	Brain	anterior	31	0	31	27.4	3.6	3.6	1.2	107.6	139.8	CoilSurveyScan	16:29:02	16:29:10	0.1	SenseRefScan	16:29:14	16:29:24	0.2	SmartBrain	16:29:27	16:30:03	0.6	DWI_tra 3mm	16:30:54	16:33:27	2.5	FLAIR_3D_sag	16:33:29	16:38:44	5.2	SWIp	16:39:08	16:44:04	4.9	3D_T1_NATIV_mDIXON_sag	16:44:07	16:49:42	5.6	T2_MV_XD_tra	16:51:44	16:54:23	2.6	3D_T1_KM_mDIXON_sag	16:54:26	17:00:01	5.6
2017	12	Brain	nvc_base	31.8	0	31.8	29.6	2.2	2.2	0.4	49	81.1	CoilSurveyScan	17:27:00	17:27:07	0.1	SenseRefScan	17:27:11	17:27:20	0.2	SmartBrain	17:27:24	17:27:59	0.6	DWI_tra 3mm	17:28:32	17:31:04	2.5	3D_DIR_sag	17:31:07	17:38:12	7.1	T1_3D_TFE_sag	17:38:24	17:44:04	5.7	T2W_MV_XD_tra	17:45:18	17:47:56	2.6	FLAIR_3D_post KM sag	17:47:59	17:53:03	5.1	3D_T1_KM_mDIXON_sag	17:53:06	17:58:46	5.7
2017	12	Brain	nvc_base	33.3	0	33.3	31.5	1.8	1.8	0.2	31.4	64.9	CoilSurveyScan	16:23:35	16:23:42	0.1	SenseRefScan	16:23:47	16:23:57	0.2	SmartBrain	16:24:00	16:24:36	0.6	DWI_tra 3mm	16:25:35	16:28:09	2.6	FLAIR_3D_sag	16:28:11	16:33:26	5.2	SWIp	16:33:43	16:38:41	5	Small DWI_Pons_ZOOM_Tra	16:38:45	16:45:05	6.3	T1_FFE_tra	16:45:08	16:48:21	3.2	3D_T1_NATIV_mDIXON_sag	16:48:25	16:54:02	5.6	T2_MV_XD_tra
2017	14	Brain	sense_knee_16_aci	37.6	0	37.6	30.1	7.5	7.5	8.5	13.7	59.8	CoilSurveyScan	18:17:48	18:17:55	0.1	SenseRefScan	18:17:59	18:18:09	0.2	SmartBrain	18:18:12	18:18:48	0.6	DWI_tra 3mm	18:19:41	18:22:13	2.5	FLAIR_3D_sag	18:22:16	18:27:30	5.2	SWIp	18:27:33	18:32:29	4.9	T1_FFE_tra	18:33:43	18:36:58	3.2	FLAIR_3D_sag	18:37:01	18:42:07	5.1	T2W_MV_XD_tra	18:46:44	18:49:22	2.6	3D_T1_KM_mDIXON_sag
2017	14	Brain	nvc_base	44.7	0	44.7	36.4	8.3	8.3	0.3	72.4	117.4	CoilSurveyScan	17:41:39	17:41:47	0.1	SenseRefScan	17:41:51	17:42:01	0.2	SmartBrain	17:42:04	17:42:40	0.6	DWI_tra 3mm	17:43:15	17:45:48	2.5	FLAIR_3D_sag	17:45:56	17:51:12	5.3	SWIp	17:51:19	17:56:16	5	T1_FFE_tra	17:56:19	17:59:34	3.3	SWIp	17:59:37	17:59:55	0.3	CoilSurveyScan	18:00:20	18:00:24	0.1	SenseRefScan
2017	14	Brain	nvc_base	45	0	45	42.9	2.1	2.1	7.4	7.4	59.8	CoilSurveyScan	19:09:23	19:09:30	0.1	SenseRefScan	19:09:35	19:09:45	0.2	SmartBrain	19:09:48	19:10:24	0.6	DWI_tra 3mm	19:10:49	19:13:21	2.5	FLAIR_3D_sag	19:13:23	19:18:38	5.2	TOF_3D_tra	19:19:33	19:23:33	4	SWIp	19:23:36	19:28:33	4.9	3D_T1_NATIV_BrainVIEW_BB	19:28:54	19:34:06	5.2	3D_T1_NATIV_mDIXON_sag	19:34:09	19:39:47	5.6	T2_DRIVE_HR_tra
2017	13	Brain	nvc_base	50.3	0	50.3	47.5	2.7	2.7	2.3	5	57.5	CoilSurveyScan	18:45:03	18:45:11	0.1	SenseRefScan	18:45:16	18:45:25	0.2	SmartBrain	18:45:28	18:46:04	0.6	DWI_tra 3mm	18:46:50	18:49:42	2.9	FLAIR_3D_sag	18:49:53	18:55:10	5.3	3D_DIR_sag	18:55:13	19:02:07	6.9	SWIp	19:02:23	19:07:48	5.4	T1_FFE_tra	19:07:50	19:11:37	3.8	T2W_MV_XD_tra	19:11:40	19:15:34	3.9	T2_mDIXON_cor
2017	9	Brain	anterior	51.7	0	51.7	30.6	21.1	21.1	19	75.8	146.5	CoilSurveyScan	17:49:30	17:49:42	0.2	Survey	17:49:47	17:50:07	0.3	SenseRefScan	17:51:40	17:51:44	0.1	SenseRefScan	17:52:25	17:52:35	0.2	T1W_SE	17:52:38	17:52:39	0	T1W_SE	17:52:48	17:56:32	3.7	CoilSurveyScan	17:57:17	17:57:21	0.1	SenseRefScan	17:57:25	17:57:34	0.1	T2W_TSE	17:57:36	17:57:43	0.1	CoilSurveyScan
2017	17	Brain	nvc_base	53.8	0	53.8	49.4	4.4	4.3	0.4	15	69.1	CoilSurveyScan	19:21:13	19:21:21	0.1	SenseRefScan	19:21:25	19:21:34	0.2	SmartBrain	19:21:38	19:22:14	0.6	DWI_tra 3mm	19:22:47	19:25:19	2.5	FLAIR_3D_sag	19:25:22	19:30:17	4.9	TOF_3D_tra	19:30:28	19:34:28	4	SWIp	19:34:32	19:39:14	4.7	T1_FFE_tra	19:39:17	19:42:25	3.1	T2_MV_XD_tra	19:42:28	19:45:06	2.6	CoilSurveyScan
2017	11	Brain	posterior	54.6	0	54.6	49.9	4.7	4.7	6.6	8.2	69.4	CoilSurveyScan	18:08:54	18:09:02	0.1	SenseRefScan	18:09:06	18:09:16	0.2	SmartBrain	18:09:20	18:09:55	0.6	DWI_tra 3mm	18:10:26	18:12:58	2.5	FLAIR_3D_sag	18:13:06	18:18:22	5.3	TOF_3D_tra	18:18:25	18:22:27	4	SWIp	18:22:33	18:27:31	5	T1_FFE_tra	18:27:33	18:30:48	3.2	T2_MV_XD_tra	18:30:51	18:30:54	0	CoilSurveyScan
2017	13	Brain	nvc_base	59.9	0	59.9	50.5	9.4	9.4	0.3	32.5	92.7	CoilSurveyScan	18:31:53	18:32:01	0.1	SenseRefScan	18:32:06	18:32:15	0.2	SmartBrain	18:32:19	18:32:54	0.6	DWI_tra 3mm	18:33:44	18:36:23	2.6	FLAIR_3D_sag	18:36:25	18:41:39	5.2	3D_DIR_sag	18:41:43	18:42:02	0.3	CoilSurveyScan	18:44:51	18:44:56	0.1	SenseRefScan	18:45:00	18:45:10	0.2	3D_DIR_sag	18:45:13	18:52:07	6.9	SWIp
2017	15	Brain	sense_knee_16_aci	68.3	0	68.3	64.9	3.3	3.3	6.3	19	93.6	CoilSurveyScan	18:26:45	18:26:53	0.1	SenseRefScan	18:26:57	18:27:07	0.2	SmartBrain	18:27:10	18:27:46	0.6	DWI_tra 3mm	18:28:28	18:31:01	2.5	FLAIR_3D_sag	18:31:03	18:36:18	5.2	TOF_3D_tra	18:36:21	18:40:21	4	SWIp	18:40:24	18:45:21	4.9	T1_FFE_tra	18:45:23	18:48:39	3.3	T2_MV_XD_tra	18:48:43	18:51:20	2.6	CoilSurveyScan
2017	13	Brain	nvc_base	74.2	0	74.2	65.5	8.6	8.6	4.2	8.1	86.5	CoilSurveyScan	19:12:49	19:12:53	0.1	CoilSurveyScan	19:13:17	19:13:24	0.1	Survey	19:13:28	19:13:50	0.4	SenseRefScan	19:13:55	19:14:06	0.2	CoilSurveyScan	19:14:06	19:14:13	0.1	Survey ComforTone	19:17:09	19:18:20	1.2	SenseRefScan	19:18:24	19:18:40	0.3	T1W_SE_ComforTone	19:18:43	19:22:39	3.9	T2W_TSE_ComforTone	19:22:44	19:25:49	3.1	FLAIR_ComforTone
2017	12	Brain	anterior	23.9	1.1	25	22.1	1.8	2.9	4.1	0.5	28.4	CoilSurveyScan	17:20:33	17:20:40	0.1	SenseRefScan	17:20:45	17:20:55	0.2	SmartBrain	17:20:58	17:21:34	0.6	DWI_tra 3mm	17:22:08	17:24:49	2.7	FLAIR_3D_sag	17:24:52	17:30:06	5.2	3D_T1_NATIV_mDIXON_sag	17:31:02	17:36:43	5.7	SWIp	17:36:46	17:41:43	5	T2_MV_XD_tra	17:41:46	17:44:24	2.6
2017	11	Brain	anterior	24.3	1.3	25.6	22.1	2.1	3.4	6.4	0.6	31.3	CoilSurveyScan	16:47:44	16:47:51	0.1	SenseRefScan	16:47:55	16:48:05	0.2	SmartBrain	16:48:09	16:48:44	0.6	DWI_tra 3mm	16:49:28	16:52:00	2.5	CoilSurveyScan	16:52:04	16:52:08	0.1	SenseRefScan	16:52:12	16:52:22	0.2	FLAIR_3D_sag	16:52:25	16:57:41	5.3	SWIp	16:58:38	17:03:35	4.9	3D_T1_NATIV_mDIXON_sag	17:03:39	17:09:18	5.7	T2W_MV_XD_tra
2017	9	Brain	nvc_base	29.9	4.2	34.1	28.4	1.5	5.7	0.2	2	32	CoilSurveyScan	15:50:07	15:50:14	0.1	SenseRefScan	15:50:19	15:50:28	0.2	SmartBrain	15:50:32	15:51:07	0.6	DWI_tra 3mm	15:51:45	15:54:17	2.5	FLAIR_3D_sag	15:54:20	15:59:34	5.2	SWIp	15:59:37	16:04:34	5	T2_MV_XD_tra	16:05:01	16:07:39	2.6	CoilSurveyScan	16:07:40	16:07:43	0.1	SenseRefScan	16:07:48	16:08:00	0.2	3D_T1_NATIV_mDIXON_sag
2017	8	Brain	nvc_base	29.7	4.3	34	26.8	2.9	7.2	0.8	1.2	31.7	CoilSurveyScan	12:28:56	12:29:04	0.1	SenseRefScan	12:29:08	12:29:18	0.2	SmartBrain	12:29:21	12:29:57	0.6	T2_mDIXON_cor	12:31:13	12:35:18	4.1	T2_mDIXON_tra	12:36:11	12:40:36	4.4	T1_KM_mDixon cor	12:41:06	12:45:13	4.1	T1_SE_tra	12:45:16	12:53:02	7.8	T2_DRIVE_tra	12:53:06	12:58:36	5.5
2017	1	Brain	nvc_base	34.3	4.4	38.6	30.8	3.5	7.9	6.9	4.1	45.3	CoilSurveyScan	07:37:30	07:38:01	0.5	SenseRefScan	07:38:06	07:38:16	0.2	SmartBrain	07:38:19	07:38:54	0.6	DWI_tra 3mm	07:39:34	07:42:06	2.5	FLAIR_3D_sag	07:42:08	07:47:23	5.2	SWIp	07:47:25	07:47:32	0.1	FLAIR_3D_sag	07:48:06	07:53:10	5.1	SWIp	07:53:13	07:58:10	4.9	T1_FFE_tra	07:58:13	08:01:29	3.3	T2W_MV_XD_tra
2017	6	Brain	nvc_base	23.7	5.1	28.8	22.2	1.5	6.6	2.5	4.7	30.9	CoilSurveyScan	11:03:57	11:04:04	0.1	SenseRefScan	11:04:09	11:04:18	0.2	SmartBrain	11:04:22	11:04:57	0.6	DWI_tra 3mm	11:05:45	11:08:27	2.7	FLAIR_3D_sag	11:08:39	11:13:55	5.3	3D_T1_NATIV_mDIXON_sag	11:13:58	11:19:43	5.7	SWIp	11:20:00	11:24:58	5	T2_MV_XD_tra	11:25:01	11:27:39	2.6
2017	5	Brain	sense_small_extr_8_aci	23.9	5.1	29	22	1.9	7	9.8	1	34.7	CoilSurveyScan	11:48:54	11:49:01	0.1	SenseRefScan	11:49:06	11:49:15	0.2	SmartBrain	11:49:19	11:49:55	0.6	DWI_tra 3mm	11:50:40	11:53:12	2.5	FLAIR_3D_sag	11:53:40	11:58:57	5.3	SWIp	11:59:02	12:03:59	4.9	3D_T1_NATIV_mDIXON_sag	12:04:23	12:10:06	5.7	T2W_MV_XD_tra	12:10:12	12:12:50	2.6
2017	7	Brain	nvc_base	60.7	5.3	66	54.2	6.4	11.7	4.7	4.8	70.2	CoilSurveyScan	13:38:11	13:38:18	0.1	SenseRefScan	13:38:23	13:38:35	0.2	SURVEY	13:38:40	13:39:14	0.6	SenseRefScan	13:40:05	13:40:15	0.2	DWIBS_b_0_800	13:40:18	13:47:05	6.8	CoilSurveyScan	13:47:11	13:47:15	0.1	SenseRefScan	13:47:20	13:47:25	0.1	CoilSurveyScan	13:49:25	13:49:30	0.1	SenseRefScan	13:49:36	13:49:50	0.2	T1_TSE_cor
2017	14	Brain	nvc_base	51.6	5.4	57	46.6	5	10.4	0.2	5.2	57	CoilSurveyScan	17:51:58	17:52:05	0.1	SenseRefScan	17:52:10	17:52:20	0.2	SmartBrain	17:52:23	17:52:59	0.6	DWI_tra 3mm	17:53:30	17:56:02	2.5	FLAIR_3D_sag	17:56:05	18:01:19	5.2	3D_DIR_sag	18:01:22	18:08:16	6.9	SWIp	18:08:28	18:12:33	4.1	T2_mDIXON_cor	18:13:15	18:17:28	4.2	T2_DRIVE_tra	18:17:31	18:23:02	5.5	T2_MV_XD_tra
2017	11	Brain	sense_wrist_8_aci	54.8	5.5	60.3	48.4	6.4	11.9	0.3	5.1	60.2	CoilSurveyScan	16:26:41	16:26:48	0.1	SenseRefScan	16:26:53	16:27:02	0.2	SmartBrain	16:27:05	16:27:41	0.6	DWI_tra 3mm	16:28:02	16:30:34	2.5	FLAIR_3D_sag	16:30:37	16:35:51	5.2	SWIp	16:36:09	16:41:06	4.9	T1_FFE_tra	16:41:08	16:44:24	3.3	T2_MV_XD_tra	16:46:22	16:49:00	2.6	T2_DRIVE_tra	16:49:36	16:55:07	5.5	Small DWI_Hippo_ZOOM_Tra
2017	6	Brain	nvc_base	46.6	5.7	52.3	43	3.7	9.4	2.6	5.4	54.6	CoilSurveyScan	12:53:28	12:53:40	0.2	SenseRefScan	12:53:45	12:53:55	0.2	SmartBrain	12:53:58	12:54:34	0.6	DWI_tra 3mm	12:55:11	12:57:43	2.5	FLAIR_3D_sag	12:58:04	13:03:19	5.2	3D_DIR_sag	13:03:22	13:10:17	6.9	SWIp	13:10:20	13:14:26	4.1	T2_mDIXON_cor	13:15:28	13:19:33	4.1	T2_DRIVE_tra	13:19:36	13:25:30	5.9	T2_MV_XD_tra
2017	4	Brain	nvc_base	66.2	5.7	71.8	56.8	9.4	15	9.4	0.4	76	CoilSurveyScan	10:34:33	10:34:40	0.1	SenseRefScan	10:34:45	10:34:54	0.2	SURVEY	10:34:58	10:35:32	0.6	DWIBS_b_0_800	10:38:23	10:44:02	5.6	CoilSurveyScan	10:44:11	10:44:15	0.1	DWIBS_b_0_800	10:44:18	10:51:06	6.8	T1_TSE_cor	10:51:11	10:55:53	4.7	T1_TSE_tra	10:56:06	11:00:45	4.7	T2W_MV_XD_tra	11:00:50	11:05:19	4.5	T2W_MV_XD_cor
2017	7	Brain	sense_breast_7m_aci	23.7	5.9	29.6	22.4	1.4	7.3	0.4	1.2	25.3	CoilSurveyScan	12:00:15	12:00:22	0.1	SenseRefScan	12:00:26	12:00:36	0.2	SmartBrain	12:00:40	12:01:15	0.6	CoilSurveyScan	12:01:52	12:01:57	0.1	DWI_tra 3mm	12:02:01	12:04:44	2.7	FLAIR_3D_sag	12:04:50	12:10:04	5.2	3D_T1_NATIV_mDIXON_sag	12:10:07	12:15:45	5.6	SenseRefScan	12:16:03	12:16:15	0.2	SWIp	12:16:21	12:21:19	5	T2_MV_XD_tra
2017	8	Brain	anterior	23.8	6	29.8	21.8	2	8	0.4	0.4	24.6	CoilSurveyScan	14:44:08	14:44:15	0.1	SenseRefScan	14:44:20	14:44:30	0.2	SmartBrain	14:44:33	14:45:08	0.6	DWI_tra 3mm	14:46:20	14:48:53	2.5	FLAIR_3D_sag	14:48:55	14:54:10	5.2	3D_T1_NATIV_mDIXON_sag	14:54:12	14:59:45	5.5	SWIp	14:59:48	15:04:44	4.9	T2_MV_XD_tra	15:05:19	15:07:57	2.6
2017	11	Brain	anterior	36.3	6	42.4	11.4	25	31	2.3	0.5	39.2	CoilSurveyScan	17:23:18	17:24:19	1	CoilSurveyScan	17:24:28	17:24:50	0.4	CoilSurveyScan	17:24:50	17:26:27	1.6	SenseRefScan	17:26:29	17:26:39	0.2	SenseRefScan	17:26:48	17:26:57	0.2	T2W_TSE	17:27:00	17:31:00	4	T2W_TSE	17:32:12	17:32:51	0.7	T2W_TSE	17:41:02	17:41:37	0.6	T2W_TSE	17:44:56	17:45:39	0.7	CoilSurveyScan
2017	3	Brain	anterior	71.2	6	77.2	59	12.2	18.2	23	5.8	100	CoilSurveyScan	09:55:33	09:55:41	0.1	SenseRefScan	09:55:45	09:55:56	0.2	SmartBrain	09:55:59	09:56:35	0.6	DWI_tra 3mm	09:57:23	10:00:07	2.7	FLAIR_3D_sag	10:00:12	10:05:27	5.2	3D_T1_NATIV_mDIXON_sag	10:05:56	10:11:37	5.7	CoilSurveyScan	10:13:43	10:13:48	0.1	SenseRefScan	10:13:55	10:14:05	0.2	T2_MV_sag	10:14:09	10:18:30	4.4	DWI_tra 3mm
2017	8	Brain	sense_knee_16_aci	63	6.2	69.3	54.8	8.3	14.5	5.9	3.6	72.5	CoilSurveyScan	13:01:59	13:02:07	0.1	SenseRefScan	13:02:11	13:02:20	0.2	SmartBrain	13:02:24	13:02:59	0.6	DWI_tra 3mm	13:03:46	13:06:21	2.6	FLAIR_3D_sag	13:06:23	13:11:38	5.2	TOF_3D_tra	13:11:41	13:15:43	4	CoilSurveyScan	13:16:16	13:16:21	0.1	SenseRefScan	13:16:25	13:16:34	0.2	SWIp	13:16:38	13:21:34	4.9	T2_MV_XD_tra
2017	7	Brain	nvc_base	34.2	6.4	40.6	26.1	8.1	14.5	0.5	5.1	39.9	CoilSurveyScan	13:47:27	13:47:35	0.1	SenseRefScan	13:47:40	13:47:49	0.2	SmartBrain	13:47:53	13:48:28	0.6	DWI_tra 3mm	13:49:45	13:52:26	2.7	FLAIR_3D_sag	13:52:29	13:57:44	5.2	TOF_3D_tra	13:58:15	14:02:15	4	T2_DRIVE_tra	14:05:57	14:07:25	1.5	T2_DRIVE_tra	14:09:48	14:16:06	6.3	3D_T1_KM_mDIXON_sag	14:16:09	14:21:41	5.5
2017	3	Brain	anterior	27.4	6.5	33.9	25.9	1.5	8	3.2	5.4	35.9	CoilSurveyScan	09:13:30	09:13:38	0.1	SenseRefScan	09:13:42	09:13:52	0.2	SmartBrain	09:13:56	09:14:31	0.6	DWI_tra 3mm	09:15:37	09:18:09	2.5	FLAIR_3D_sag	09:18:12	09:23:26	5.2	SWIp	09:23:29	09:28:26	5	3D_T1_NATIV_mDIXON_sag	09:28:29	09:34:08	5.6	TOF_3D_tra	09:34:11	09:38:11	4	T2W_MV_XD_tra	09:38:14	09:40:52	2.6
2017	1	Brain	sense_breast_7m_aci	73.9	6.5	80.4	67.6	6.3	12.8	0.3	6.3	80.5	CoilSurveyScan	08:27:30	08:28:01	0.5	SenseRefScan	08:28:06	08:28:16	0.2	SURVEY	08:28:19	08:28:53	0.6	CoilSurveyScan	08:31:29	08:31:34	0.1	DWIBS_b_0_800	08:31:38	08:38:26	6.8	T1_TSE_cor	08:38:29	08:42:45	4.3	T1_TSE_tra	08:42:52	08:47:04	4.2	T2W_MV_XD_tra	08:47:08	08:50:31	3.4	SenseRefScan	08:50:34	08:50:46	0.2	T2W_MV_XD_cor
2017	2	Brain	sense_small_extr_8_aci	22.1	7	29.1	19	3.1	10.1	23	0.9	46	CoilSurveyScan	08:36:39	08:36:46	0.1	SenseRefScan	08:36:52	08:37:18	0.4	SURVEY	08:37:20	08:37:58	0.6	CoilSurveyScan	08:39:08	08:39:13	0.1	SenseRefScan	08:39:17	08:39:40	0.4	CoilSurveyScan	08:39:47	08:39:51	0.1	SenseRefScan	08:39:56	08:40:19	0.4	T2_SSH_BH_tra	08:40:22	08:44:10	3.8	CoilSurveyScan	08:44:14	08:44:18	0.1	SenseRefScan
2017	9	Brain	sense_breast_7m_aci	30.3	7	37.3	25.1	5.2	12.2	8.4	4.9	43.6	CoilSurveyScan	14:00:40	14:00:47	0.1	SenseRefScan	14:00:52	14:01:02	0.2	SmartBrain	14:01:05	14:01:41	0.6	DWI_tra 3mm	14:03:08	14:05:40	2.5	FLAIR_3D_sag	14:05:44	14:10:58	5.2	SWIp	14:11:00	14:15:57	5	T1_FFE_tra	14:16:00	14:19:14	3.2	T2W_MV_XD_tra	14:22:39	14:25:17	2.6	3D_T1_KM_mDIXON_sag	14:25:20	14:30:57	5.6
2017	12	Brain	nvc_base	29.8	7.2	37	25.9	3.8	11.1	3.7	6.6	40.1	CoilSurveyScan	16:49:47	16:49:54	0.1	SenseRefScan	16:49:58	16:50:08	0.2	SmartBrain	16:50:11	16:50:41	0.5	CoilSurveyScan	16:52:24	16:52:31	0.1	SenseRefScan	16:52:36	16:52:45	0.2	SmartBrain	16:52:49	16:53:25	0.6	DWI_tra 3mm	16:53:50	16:56:22	2.5	FLAIR_3D_sag	16:56:25	17:01:40	5.2	SWIp	17:01:54	17:06:50	4.9	T1_FFE_tra
2017	12	Brain	nvc_base	37.5	7.2	44.7	34.8	2.8	10	0.4	7	44.9	CoilSurveyScan	18:10:33	18:10:40	0.1	SenseRefScan	18:10:45	18:10:54	0.2	SmartBrain	18:10:58	18:11:34	0.6	DWI_tra 3mm	18:12:20	18:14:53	2.5	FLAIR_3D_sag	18:14:55	18:20:09	5.2	SWIp	18:20:12	18:25:09	4.9	T2_HR_mDIXON_TSE	18:25:42	18:30:46	5.1	T1_FFE_tra	18:30:49	18:34:04	3.2	T2W_MV_XD_tra	18:35:07	18:37:45	2.6	T1_KM_mDIXON_TSE_cor
2017	11	Brain	nvc_base	23.6	7.5	31.1	22.2	1.4	8.9	0.2	7.2	31.1	CoilSurveyScan	16:50:11	16:50:19	0.1	SenseRefScan	16:50:24	16:50:33	0.2	SmartBrain	16:50:36	16:51:12	0.6	DWI_tra 3mm	16:51:45	16:54:26	2.7	FLAIR_3D_sag	16:54:34	16:59:50	5.3	3D_T1_NATIV_mDIXON_sag	16:59:54	17:05:42	5.8	SWIp	17:06:12	17:11:09	5	T2_MV_XD_tra	17:11:12	17:13:50	2.6
2017	8	Brain	sense_breast_7m_aci	29.2	7.5	36.7	27.8	1.4	8.9	0.3	3.9	33.5	CoilSurveyScan	14:24:08	14:24:16	0.1	SenseRefScan	14:24:21	14:24:31	0.2	SmartBrain	14:24:34	14:25:10	0.6	DWI_tra 3mm	14:25:56	14:28:29	2.5	FLAIR_3D_sag	14:28:32	14:33:46	5.2	3D_T1_NATIV_mDIXON_sag	14:33:49	14:39:30	5.7	Small DWI_Pons_ZOOM_Tra	14:39:49	14:45:42	5.9	SWIp	14:45:44	14:50:41	4.9	T2_MV_XD_tra	14:50:44	14:53:22	2.6
2017	7	Brain	nvc_base	60.2	7.5	67.7	55.1	5.1	12.6	8.4	7.1	75.8	CoilSurveyScan	14:22:33	14:22:41	0.1	SenseRefScan	14:22:45	14:22:55	0.2	SmartBrain	14:22:58	14:23:34	0.6	CoilSurveyScan	14:24:19	14:24:24	0.1	DWIBS_b_0_800	14:24:28	14:31:15	6.8	T1_TSE_cor	14:31:20	14:35:38	4.3	T1_TSE_tra	14:35:57	14:40:14	4.3	T2W_MV_XD_tra	14:40:18	14:43:40	3.4	T2W_MV_XD_cor	14:43:45	14:47:08	3.4	STIR_MV_XD_tra
2017	5	Brain	anterior	27.9	7.6	35.4	22.1	5.8	13.3	11.5	1.1	40.5	CoilSurveyScan	10:35:54	10:36:01	0.1	SenseRefScan	10:36:07	10:36:30	0.4	SURVEY	10:36:33	10:37:13	0.7	CoilSurveyScan	10:38:03	10:38:07	0.1	SenseRefScan	10:38:11	10:38:35	0.4	CoilSurveyScan	10:38:43	10:38:47	0.1	SenseRefScan	10:38:50	10:39:14	0.4	T2_SSH_BH_tra	10:39:16	10:42:54	3.6	CoilSurveyScan	10:42:58	10:43:02	0.1	SenseRefScan
2017	6	Brain	sense_ankle_8_aci	57	7.6	64.6	50.2	6.7	14.4	9.8	7.3	74.1	CoilSurveyScan	11:52:26	11:52:33	0.1	SenseRefScan	11:52:37	11:52:47	0.2	SmartBrain	11:52:51	11:53:26	0.6	DWI_tra 3mm	11:54:05	11:56:38	2.5	FLAIR_3D_sag	11:56:41	12:01:55	5.2	SWIp	12:02:26	12:07:22	4.9	T1_FFE_tra	12:07:26	12:10:41	3.2	T1_TSE_sag	12:10:44	12:13:39	2.9	T2_TSE_cor	12:14:58	12:19:09	4.2	T1_TSE_cor
2017	1	Brain	nvc_base	26.2	7.7	33.8	22.3	3.9	11.5	9	7.2	42.4	CoilSurveyScan	07:45:44	07:46:15	0.5	SenseRefScan	07:46:19	07:46:29	0.2	SmartBrain	07:46:33	07:47:08	0.6	DWI_tra 3mm	07:50:24	07:53:03	2.6	FLAIR_3D_sag	07:53:05	07:58:19	5.2	3D_T1_NATIV_mDIXON_sag	07:58:40	08:04:14	5.6	SWIp	08:04:17	08:09:14	5	T2_MV_XD_tra	08:09:18	08:11:55	2.6
2017	10	Brain	nvc_base	62.2	7.7	69.9	57.1	5.1	12.8	0.7	7.3	70.2	CoilSurveyScan	17:30:12	17:30:20	0.1	SenseRefScan	17:30:25	17:30:34	0.2	SmartBrain	17:30:37	17:31:13	0.6	DWI_tra 3mm	17:31:40	17:34:12	2.5	FLAIR_3D_sag	17:34:15	17:39:29	5.2	TOF_3D_tra	17:39:32	17:43:32	4	SWIp	17:43:45	17:48:41	4.9	T1_FFE_tra	17:48:44	17:51:58	3.2	T2_MV_XD_tra	17:52:02	17:54:39	2.6	CoilSurveyScan
2017	4	Brain	sense_shoulder8_dci	45.9	7.8	53.7	38.1	7.8	15.6	8	4	57.8	CoilSurveyScan	09:35:42	09:35:50	0.1	SenseRefScan	09:35:55	09:36:04	0.2	SmartBrain	09:36:08	09:36:44	0.6	DWI_tra 3mm	09:38:13	09:40:46	2.5	FLAIR_3D_sag	09:40:48	09:46:02	5.2	TOF_3D_tra	09:46:06	09:50:06	4	CoilSurveyScan	09:51:44	09:51:49	0.1	SenseRefScan	09:51:52	09:52:05	0.2	SenseRefScan	09:52:09	09:52:19	0.2	SURVEY
2017	10	Brain	nvc_base	52.9	7.8	60.7	49.7	3.2	11	5.1	7.6	65.6	CoilSurveyScan	17:05:31	17:05:38	0.1	SenseRefScan	17:05:43	17:05:53	0.2	SmartBrain	17:05:56	17:06:32	0.6	DWI_tra 3mm	17:07:03	17:09:35	2.5	CoilSurveyScan	17:09:42	17:09:46	0.1	SenseRefScan	17:09:51	17:10:04	0.2	SenseRefScan	17:10:09	17:10:18	0.2	SURVEY	17:10:22	17:10:57	0.6	FLAIR_3D_sag	17:11:03	17:16:18	5.2	SWIp
2017	4	Brain	nvc_base	68.1	7.8	75.9	60.4	7.6	15.5	8.7	7.2	84	CoilSurveyScan	10:17:51	10:17:58	0.1	SenseRefScan	10:18:03	10:18:16	0.2	SenseRefScan	10:18:20	10:18:30	0.2	SURVEY	10:18:35	10:19:09	0.6	DWIBS_b_0_800	10:20:19	10:27:07	6.8	T2W_MV_XD_cor	10:27:10	10:30:32	3.4	T1_TSE_cor	10:30:35	10:34:49	4.2	T1_TSE_tra	10:35:17	10:39:31	4.2	T2W_MV_XD_tra	10:39:35	10:42:57	3.4	STIR_MV_XD_tra
2017	3	Brain	posterior	27.5	7.9	35.4	22.3	5.2	13.1	11.7	6.2	45.3	CoilSurveyScan	09:25:35	09:25:43	0.1	SenseRefScan	09:25:48	09:26:11	0.4	SURVEY	09:26:14	09:26:52	0.6	CoilSurveyScan	09:28:48	09:28:52	0.1	SenseRefScan	09:28:57	09:30:28	1.5	CoilSurveyScan	09:30:34	09:30:39	0.1	SenseRefScan	09:30:43	09:31:08	0.4	T2_SSH_BH_tra	09:31:11	09:35:47	4.6	CoilSurveyScan	09:36:31	09:36:36	0.1	SenseRefScan
2017	9	Brain	nvc_base	42.2	7.9	50.1	35.6	6.5	14.5	29.8	3.3	75.2	CoilSurveyScan	13:47:12	13:47:20	0.1	SenseRefScan	13:47:24	13:47:38	0.2	SmartBrain	13:47:42	13:48:17	0.6	CoilSurveyScan	13:52:22	13:52:27	0.1	SenseRefScan	13:52:31	13:52:45	0.2	SenseRefScan	13:52:49	13:53:00	0.2	SURVEY	13:53:03	13:53:38	0.6	DWIBS_b_0_800	13:54:59	14:01:47	6.8	3D_T1_BrainVIEW_BB_MSDE	14:02:00	14:07:21	5.3	SenseRefScan
2017	12	Brain	sense_breast_7m_aci	56.6	7.9	64.5	50.5	6.2	14	0.4	2.7	59.8	CoilSurveyScan	15:55:27	15:55:35	0.1	SenseRefScan	15:55:39	15:55:49	0.2	SmartBrain	15:55:53	15:56:28	0.6	DWI_tra 3mm	15:57:05	15:59:43	2.6	FLAIR_3D_sag	15:59:47	16:05:01	5.2	TOF_3D_tra	16:05:04	16:09:07	4.1	SWIp	16:09:10	16:14:29	5.3	T1_FFE_tra	16:14:31	16:17:46	3.2	T2_MV_XD_tra	16:17:49	16:20:27	2.6	CoilSurveyScan
2017	3	Brain	anterior	21	8	28.9	17.6	3.3	11.3	27.2	0.5	48.6	CoilSurveyScan	09:05:04	09:05:11	0.1	SenseRefScan	09:05:17	09:05:40	0.4	SURVEY	09:05:43	09:06:19	0.6	CoilSurveyScan	09:07:22	09:07:27	0.1	SenseRefScan	09:07:32	09:07:55	0.4	CoilSurveyScan	09:08:02	09:08:06	0.1	SenseRefScan	09:08:11	09:08:37	0.4	T2_SSH_BH_tra	09:08:41	09:12:04	3.4	CoilSurveyScan	09:12:09	09:12:13	0.1	SenseRefScan
2017	1	Brain	nvc_base	34.1	8	42.2	28.5	5.7	13.7	19.8	4.6	58.6	CoilSurveyScan	08:01:02	08:01:33	0.5	SenseRefScan	08:01:38	08:01:47	0.2	SmartBrain	08:01:51	08:02:27	0.6	DWI_tra 3mm	08:03:06	08:05:10	2.1	CoilSurveyScan	08:06:28	08:06:36	0.1	SenseRefScan	08:06:40	08:06:50	0.2	SmartBrain	08:06:54	08:07:29	0.6	DWI_tra 3mm	08:08:01	08:10:33	2.5	FLAIR_3D_sag	08:10:40	08:15:56	5.3	SWIp
2017	4	Brain	anterior	57.7	8	65.7	53.4	4.4	12.4	0.7	2.8	61.2	CoilSurveyScan	10:15:31	10:15:39	0.1	SenseRefScan	10:15:43	10:15:53	0.2	SURVEY	10:15:56	10:16:30	0.6	DWIBS_b_0_800	10:18:07	10:24:54	6.8	STIR_MV_XD_cor	10:24:57	10:30:48	5.9	T1_TSE_cor	10:30:51	10:35:34	4.7	STIR_MV_XD_tra	10:35:38	10:40:04	4.4	T1_TSE_tra	10:40:07	10:44:19	4.2	T2W_MV_XD_tra	10:44:24	10:47:55	3.5	T2W_MV_XD_cor
2017	2	Brain	sense_knee_16_aci	29.9	8.1	38	25.1	4.9	12.9	3.5	5.2	38.7	CoilSurveyScan	08:20:12	08:20:20	0.1	SenseRefScan	08:20:24	08:20:34	0.2	SmartBrain	08:20:37	08:21:13	0.6	DWI_tra 3mm	08:21:43	08:24:15	2.5	FLAIR_3D_sag	08:24:18	08:29:33	5.2	SWIp	08:30:21	08:35:17	4.9	T1_FFE_tra	08:35:20	08:38:34	3.2	T2W_MV_XD_tra	08:41:50	08:44:28	2.6	3D_T1_KM_mDIXON_sag	08:44:31	08:50:09	5.6
2017	10	Brain	nvc_base	49.3	8.1	57.4	43.9	5.4	13.5	6.7	7.7	63.7	CoilSurveyScan	16:06:39	16:06:47	0.1	SenseRefScan	16:06:51	16:07:01	0.2	SmartBrain	16:07:04	16:07:39	0.6	DWI_tra 3mm	16:08:38	16:11:10	2.5	FLAIR_3D_sag	16:11:12	16:16:27	5.2	SWIp	16:16:30	16:21:26	4.9	T1_FFE_tra	16:21:29	16:24:42	3.2	TOF_3D_tra	16:24:44	16:24:57	0.2	TOF_3D_tra	16:25:18	16:29:18	4	T2_MV_XD_tra
2017	11	Brain	nvc_base	27.5	8.4	35.9	25.2	2.4	10.8	14.5	0.7	42.7	CoilSurveyScan	15:47:38	15:47:46	0.1	SenseRefScan	15:47:50	15:48:00	0.2	SmartBrain	15:48:03	15:48:39	0.6	DWI_tra 3mm	15:49:21	15:51:53	2.5	FLAIR_3D_sag	15:52:10	15:57:26	5.3	SWIp	15:57:32	16:02:29	5	T1_FFE_tra	16:02:32	16:05:45	3.2	T2_MV_XD_tra	16:06:47	16:09:25	2.6	3D_T1_KM_mDIXON_sag	16:09:31	16:15:10	5.6
2017	3	Brain	posterior	30.6	8.4	39	21.3	9.2	17.7	5.1	3.3	38.9	CoilSurveyScan	09:15:22	09:15:29	0.1	SenseRefScan	09:15:34	09:17:02	1.5	SenseRefScan	09:17:49	09:18:09	0.3	SenseRefScan	09:19:04	09:19:28	0.4	SURVEY	09:19:32	09:20:14	0.7	CoilSurveyScan	09:21:59	09:22:04	0.1	SenseRefScan	09:22:08	09:22:27	0.3	CoilSurveyScan	09:22:34	09:22:39	0.1	SenseRefScan	09:22:43	09:23:06	0.4	T2_SSH_BH_tra
2017	13	Brain	posterior	29.7	8.5	38.3	27.1	2.7	11.2	0.2	8.1	38	CoilSurveyScan	17:18:49	17:18:57	0.1	SenseRefScan	17:19:01	17:19:11	0.2	SmartBrain	17:19:14	17:19:50	0.6	DWI_tra 3mm	17:20:31	17:23:03	2.5	FLAIR_3D_sag	17:23:11	17:28:28	5.3	SWIp	17:28:46	17:33:43	4.9	T2_HR_mDIXON_TSE	17:33:48	17:38:52	5.1	3D_T1_NATIV_mDIXON_sag	17:38:54	17:44:36	5.7	T2_MV_XD_tra	17:44:41	17:44:47	0.1	T2_MV_XD_tra
2017	10	Brain	nvc_base	37	8.5	45.6	31.6	5.4	14	7.2	6.1	50.3	CoilSurveyScan	13:43:44	13:43:52	0.1	SenseRefScan	13:43:56	13:44:05	0.2	SmartBrain	13:44:09	13:44:44	0.6	CoilSurveyScan	13:45:43	13:45:47	0.1	DWI_tra 3mm	13:45:51	13:48:25	2.6	FLAIR_3D_sag	13:48:30	13:53:45	5.2	SenseRefScan	13:53:50	13:54:03	0.2	SWIp	13:54:06	13:59:05	5	STIR_longTE_cor	13:59:24	13:59:27	0	STIR_longTE_tra
2017	10	Brain	sense_ankle_8_aci	27.7	8.6	36.3	25.3	2.4	11	0.5	8.1	36.3	CoilSurveyScan	15:59:04	15:59:11	0.1	SenseRefScan	15:59:16	15:59:26	0.2	SmartBrain	15:59:30	16:00:05	0.6	DWI_tra 3mm	16:01:02	16:03:36	2.6	FLAIR_3D_sag	16:03:39	16:08:53	5.2	SWIp	16:08:56	16:13:54	5	T1_FFE_tra	16:13:57	16:17:16	3.3	T2_MV_XD_tra	16:18:21	16:20:59	2.6	3D_T1_KM_mDIXON_sag	16:21:02	16:26:44	5.7
2017	15	Brain	sense_knee_16_aci	28.2	8.6	36.9	27.1	1.1	9.8	0.2	5.2	33.6	CoilSurveyScan	18:12:23	18:12:30	0.1	SenseRefScan	18:12:35	18:12:45	0.2	SmartBrain	18:12:48	18:13:24	0.6	DWI_tra 3mm	18:13:48	18:16:29	2.7	FLAIR_3D_sag	18:16:32	18:21:47	5.2	3D_T1_NATIV_mDIXON_sag	18:22:01	18:27:39	5.6	SWIp	18:27:41	18:32:38	4.9	T2_HR_mDIXON_TSE	18:32:41	18:37:45	5.1	T2_MV_XD_tra	18:37:59	18:40:37	2.6
2017	1	Brain	nvc_base	66.9	8.6	75.5	62.1	4.8	13.4	8.9	7	82.8	CoilSurveyScan	07:41:04	07:41:39	0.6	SenseRefScan	07:41:43	07:41:56	0.2	SenseRefScan	07:42:01	07:42:10	0.2	SURVEY	07:42:14	07:42:48	0.6	CoilSurveyScan	07:44:01	07:44:06	0.1	SenseRefScan	07:44:09	07:44:22	0.2	DWIBS_b_0_800	07:44:27	07:51:14	6.8	T1_TSE_cor	07:51:19	07:55:38	4.3	SenseRefScan	07:55:42	07:55:52	0.2	STIR_MV_XD_cor
2017	4	Brain	anterior	39.5	8.7	48.3	32	7.5	16.3	10.4	3.5	53.4	CoilSurveyScan	10:46:34	10:46:42	0.1	SenseRefScan	10:46:46	10:46:56	0.2	SmartBrain	10:46:59	10:47:35	0.6	DWI_tra 3mm	10:48:07	10:50:40	2.5	FLAIR_3D_sag	10:50:42	10:55:56	5.2	SWIp	10:56:13	11:01:09	4.9	Small DWI_Pons_ZOOM_Tra	11:01:49	11:07:42	5.9	CoilSurveyScan	11:11:38	11:11:43	0.1	SenseRefScan	11:11:48	11:11:57	0.2	SmartBrain
2017	7	Brain	nvc_base	28.3	8.9	37.2	25.1	3.2	12.1	10.1	6.7	45.1	CoilSurveyScan	13:56:37	13:56:44	0.1	SenseRefScan	13:56:48	13:56:58	0.2	SmartBrain	13:57:02	13:57:37	0.6	DWI_tra 3mm	13:58:23	14:00:55	2.5	FLAIR_3D_sag	14:00:58	14:06:12	5.2	SWIp	14:06:23	14:11:20	4.9	T1_FFE_tra	14:11:23	14:14:39	3.3	T2_MV_XD_tra	14:16:40	14:19:18	2.6	3D_T1_KM_mDIXON_sag	14:19:21	14:24:58	5.6
2017	10	Brain	nvc_base	23.9	9	33	22.4	1.5	10.6	0.2	0.5	24.7	CoilSurveyScan	13:49:16	13:49:24	0.1	SenseRefScan	13:49:28	13:49:38	0.2	SmartBrain	13:49:41	13:50:17	0.6	DWI_tra 3mm	13:51:02	13:53:44	2.7	CoilSurveyScan	13:54:06	13:54:11	0.1	SenseRefScan	13:54:15	13:54:24	0.2	FLAIR_3D_sag	13:54:27	13:59:44	5.3	3D_T1_NATIV_mDIXON_sag	13:59:47	14:05:30	5.7	SWIp	14:05:35	14:10:33	5	T2_MV_XD_tra
2017	8	Brain	nvc_base	60.8	9	69.9	56.5	4.4	13.4	0.2	5.2	66.2	CoilSurveyScan	13:40:27	13:40:34	0.1	SenseRefScan	13:40:38	13:40:48	0.2	SmartBrain	13:40:52	13:41:27	0.6	DWI_tra 3mm	13:41:57	13:44:31	2.6	SenseRefScan	13:44:34	13:44:43	0.2	FLAIR_3D_sag	13:44:48	13:50:02	5.2	SWIp	13:50:05	13:55:03	5	T1_FFE_tra	13:55:06	13:58:23	3.3	CoilSurveyScan	13:58:24	13:58:27	0.1	SenseRefScan
2017	3	Brain	anterior	22.9	9.1	32.1	19.1	3.8	13	0.3	5.8	29	CoilSurveyScan	09:16:59	09:17:06	0.1	SenseRefScan	09:17:11	09:18:51	1.7	CoilSurveyScan	09:20:15	09:20:22	0.1	SenseRefScan	09:20:27	09:20:52	0.4	SURVEY	09:20:55	09:21:32	0.6	CoilSurveyScan	09:22:19	09:22:24	0.1	SenseRefScan	09:22:28	09:22:52	0.4	CoilSurveyScan	09:22:59	09:23:04	0.1	SenseRefScan	09:23:07	09:23:32	0.4	T2_SSH_BH_tra
2017	6	Brain	sense_breast_7m_aci	67.8	9.1	76.9	62.6	5.2	14.3	8.9	8.7	85.4	CoilSurveyScan	11:56:28	11:56:36	0.1	SenseRefScan	11:56:40	11:56:50	0.2	SURVEY	11:56:53	11:57:27	0.6	CoilSurveyScan	11:58:50	11:58:54	0.1	SenseRefScan	11:58:58	11:59:08	0.2	DWIBS_b_0_800	11:59:11	12:05:58	6.8	T1_TSE_cor	12:06:02	12:10:18	4.3	T1_TSE_tra	12:10:46	12:14:59	4.2	T2W_MV_XD_tra	12:15:04	12:18:27	3.4	SenseRefScan
2017	9	Brain	nvc_base	79.2	9.1	88.3	72.5	6.7	15.8	0.2	0.5	79.9	CoilSurveyScan	16:01:45	16:01:52	0.1	SenseRefScan	16:01:56	16:02:06	0.2	SmartBrain	16:02:09	16:02:45	0.6	DWI_tra 3mm	16:03:06	16:05:37	2.5	FLAIR_3D_sag	16:05:40	16:10:54	5.2	SWIp	16:10:57	16:15:54	4.9	TOF_3D_tra	16:15:57	16:19:57	4	T1_FFE_tra	16:19:59	16:23:12	3.2	T2_MV_XD_tra	16:23:15	16:25:53	2.6	SURVEY_SAG
2017	11	Brain	sense_ankle_8_aci	27.2	9.2	36.5	25.8	1.4	10.6	0.2	0.4	27.8	CoilSurveyScan	14:56:38	14:56:46	0.1	SenseRefScan	14:56:51	14:57:01	0.2	SmartBrain	14:57:04	14:57:40	0.6	DWI_tra 3mm	14:58:18	15:00:50	2.5	FLAIR_3D_sag	15:00:53	15:06:08	5.2	TOF_3D_tra	15:06:11	15:10:11	4	3D_T1_NATIV_mDIXON_sag	15:10:37	15:16:11	5.6	SWIp	15:16:14	15:21:11	5	T2_MV_XD_tra	15:21:14	15:23:52	2.6
2017	6	Brain	anterior	44.8	9.2	54	40.7	4.1	13.3	0.6	1.4	46.8	CoilSurveyScan	11:34:03	11:34:11	0.1	SenseRefScan	11:34:15	11:34:25	0.2	SmartBrain	11:34:28	11:35:04	0.6	DWI_tra 3mm	11:35:51	11:38:23	2.5	CoilSurveyScan	11:38:26	11:38:30	0.1	SenseRefScan	11:38:35	11:38:47	0.2	SURVEY	11:38:52	11:39:26	0.6	FLAIR_3D_sag	11:39:34	11:44:48	5.2	SWIp	11:44:51	11:49:48	4.9	T1_FFE_tra
2017	11	Brain	nvc_base	56.5	9.2	65.7	50.9	5.6	14.8	22.7	8.7	88	CoilSurveyScan	16:41:28	16:41:35	0.1	SenseRefScan	16:41:40	16:41:49	0.2	SmartBrain	16:41:53	16:42:28	0.6	DWI_tra 3mm	16:43:53	16:46:26	2.5	FLAIR_3D_sag	16:46:43	16:51:58	5.2	SWIp	16:52:00	16:56:58	5	T1_FFE_tra	16:57:09	17:00:24	3.2	T2_MV_XD_tra	17:00:27	17:03:05	2.6	T2_DRIVE_HR_tra	17:03:59	17:09:30	5.5	CoilSurveyScan
2017	11	Brain	sense_breast_7m_aci	27	9.3	36.3	25.9	1.1	10.4	4.2	5.6	36.8	CoilSurveyScan	16:13:30	16:13:37	0.1	SenseRefScan	16:13:42	16:13:52	0.2	SmartBrain	16:13:55	16:14:31	0.6	DWI_tra 3mm	16:15:02	16:17:33	2.5	FLAIR_3D_sag	16:17:37	16:22:51	5.2	TOF_3D_tra	16:23:09	16:27:09	4	SWIp	16:27:12	16:32:08	4.9	3D_T1_NATIV_mDIXON_sag	16:32:11	16:37:48	5.6	T2_MV_XD_tra	16:37:51	16:40:29	2.6
2017	10	Brain	anterior	34.6	9.3	43.9	31.8	2.8	12.1	2.8	6.6	44	CoilSurveyScan	13:28:56	13:29:04	0.1	SenseRefScan	13:29:08	13:29:18	0.2	SmartBrain	13:29:21	13:29:57	0.6	DWI_tra 3mm	13:30:21	13:32:53	2.5	FLAIR_3D_sag	13:32:56	13:38:10	5.2	SWIp	13:38:13	13:43:16	5.1	Small DWI_Pons_ZOOM_Tra	13:43:58	13:49:53	5.9	T1_FFE_tra	13:49:56	13:53:26	3.5	CoilSurveyScan	13:54:42	13:54:46	0.1	SenseRefScan
2017	5	Brain	anterior	52.9	9.4	62.2	49	3.9	13.3	9.1	8.9	70.8	CoilSurveyScan	10:43:11	10:43:19	0.1	SenseRefScan	10:43:23	10:43:33	0.2	SmartBrain	10:43:35	10:44:11	0.6	DWI_tra 3mm	10:45:58	10:48:30	2.5	FLAIR_3D_sag	10:48:37	10:53:54	5.3	SWIp	10:53:59	10:58:56	5	TOF_3D_tra	10:59:02	11:03:04	4	T1_FFE_tra	11:03:10	11:06:27	3.3	T1_TSE_cor	11:06:32	11:12:02	5.5	T2_DRIVE_tra
2017	10	Brain	nvc_base	35.2	9.5	44.8	27.2	8	17.5	3.4	9.3	48	CoilSurveyScan	16:37:05	16:37:13	0.1	SenseRefScan	16:37:17	16:37:27	0.2	SmartBrain	16:37:30	16:38:06	0.6	DWI_tra 3mm	16:38:40	16:39:48	1.1	CoilSurveyScan	16:43:51	16:43:56	0.1	SenseRefScan	16:44:00	16:44:09	0.1	SenseRefScan	16:44:15	16:44:24	0.2	SmartBrain	16:44:27	16:45:01	0.6	DWI_tra 3mm	16:45:51	16:48:13	2.4	FLAIR_3D_sag
2017	7	Brain	anterior	56.2	9.5	65.6	53.9	2.3	11.8	5.3	8.9	70.4	CoilSurveyScan	15:36:51	15:36:59	0.1	SenseRefScan	15:37:03	15:37:13	0.2	SmartBrain	15:37:16	15:37:52	0.6	DWI_tra 3mm	15:38:52	15:41:24	2.5	SenseRefScan	15:41:30	15:41:40	0.2	FLAIR_3D_sag	15:41:44	15:47:00	5.3	T1_FFE_tra	15:47:04	15:50:21	3.3	TOF_3D_tra	15:50:26	15:54:28	4	T2_MV_XD_tra	15:54:44	15:57:22	2.6	T2_TSE_cor
2017	9	Brain	nvc_base	23.9	9.6	33.5	22.1	1.8	11.4	0.2	2.3	26.4	CoilSurveyScan	13:10:14	13:10:21	0.1	SenseRefScan	13:10:26	13:10:36	0.2	SmartBrain	13:10:39	13:11:15	0.6	DWI_tra 3mm	13:12:07	13:14:51	2.7	FLAIR_3D_sag	13:15:29	13:20:44	5.2	3D_T1_NATIV_mDIXON_sag	13:20:47	13:26:25	5.6	SWIp	13:26:28	13:31:25	5	T2_MV_XD_tra	13:31:28	13:34:06	2.6
2017	11	Brain	nvc_base	41.4	9.6	51	35.5	5.9	15.5	0.1	9.3	50.8	CoilSurveyScan	18:06:13	18:06:20	0.1	SenseRefScan	18:06:24	18:06:34	0.2	SmartBrain	18:06:37	18:07:13	0.6	DWI_tra 3mm	18:07:43	18:10:14	2.5	FLAIR_3D_sag	18:14:06	18:19:23	5.3	SWIp	18:19:29	18:24:27	5	TOF_3D_tra	18:24:33	18:28:35	4	T1_FFE_tra	18:28:42	18:31:57	3.3	T2_MV_XD_tra	18:32:01	18:34:38	2.6	PCA_3D_cor_Venc 30
2017	2	Brain	nvc_base	23	9.7	32.7	21.8	1.2	10.9	1.5	0.8	25.3	CoilSurveyScan	08:56:34	08:56:41	0.1	SenseRefScan	08:56:46	08:56:56	0.2	SmartBrain	08:56:58	08:57:34	0.6	DWI_tra 3mm	08:58:11	09:00:43	2.5	FLAIR_3D_sag	09:00:46	09:06:00	5.2	3D_T1_NATIV_mDIXON_sag	09:06:16	09:11:53	5.6	SWIp	09:11:55	09:16:52	4.9	T2_MV_XD_tra	09:16:56	09:19:33	2.6
2017	11	Brain	nvc_base	43.6	9.7	53.3	40.3	3.4	13.1	0.2	9.4	53.3	CoilSurveyScan	17:13:10	17:13:18	0.1	SenseRefScan	17:13:22	17:13:32	0.2	SmartBrain	17:13:35	17:14:11	0.6	DWI_tra 3mm	17:14:50	17:17:22	2.5	FLAIR_3D_sag	17:17:25	17:22:40	5.2	CoilSurveyScan	17:22:48	17:22:53	0.1	SenseRefScan	17:22:57	17:23:09	0.2	SURVEY	17:23:14	17:23:49	0.6	SWIp	17:23:56	17:28:52	4.9	TOF_3D_tra
2017	10	Brain	nvc_base	44.9	9.7	54.7	38.5	6.4	16.2	4.1	9.5	58.5	CoilSurveyScan	16:18:31	16:18:39	0.1	SenseRefScan	16:18:43	16:18:52	0.2	SmartBrain	16:18:56	16:19:31	0.6	FLAIR_longTR	16:20:58	16:25:03	4.1	T1_TSE_sag	16:25:06	16:28:01	2.9	T2_TSE_cor	16:30:22	16:34:33	4.2	T2_DRIVE_HR_sag	16:34:53	16:41:34	6.7	T1_TSE_cor	16:41:37	16:45:27	3.8	T1_Dyn_TSE	16:45:31	16:48:55	3.4	T1_KM_TSE_cor
2017	5	Brain	anterior	51.2	9.7	60.9	46.8	4.4	14.1	0.2	9.4	60.9	CoilSurveyScan	13:19:51	13:20:24	0.6	SenseRefScan	13:20:29	13:20:38	0.2	SmartBrain	13:20:41	13:21:17	0.6	DWI_tra 3mm	13:22:20	13:24:52	2.5	FLAIR_3D_sag	13:25:00	13:30:17	5.3	TOF_3D_tra	13:30:19	13:34:21	4	SWIp	13:34:27	13:39:25	5	CoilSurveyScan	13:40:22	13:40:26	0.1	SenseRefScan	13:40:31	13:40:43	0.2	SURVEY
2017	9	Brain	nvc_base	28.1	9.8	37.9	25.4	2.7	12.5	11.5	9	48.6	CoilSurveyScan	16:52:20	16:52:28	0.1	SenseRefScan	16:52:31	16:52:41	0.2	SmartBrain	16:52:45	16:53:20	0.6	DWI_tra 3mm	16:53:50	16:56:22	2.5	FLAIR_3D_sag	16:56:25	17:01:39	5.2	SWIp	17:01:42	17:06:39	4.9	T1_FFE_tra	17:07:00	17:10:19	3.3	T2_MV_XD_tra	17:11:56	17:14:34	2.6	3D_T1_KM_mDIXON_sag	17:14:37	17:20:26	5.8
2017	13	Brain	posterior	31.5	9.8	41.2	25.3	6.1	15.9	4.9	9.5	45.9	CoilSurveyScan	17:10:43	17:10:51	0.1	SenseRefScan	17:10:55	17:11:05	0.2	SmartBrain	17:11:08	17:11:44	0.6	DWI_tra 3mm	17:12:14	17:14:46	2.5	FLAIR_3D_sag	17:14:49	17:20:03	5.2	SWIp	17:20:06	17:25:03	4.9	T1_FFE_tra	17:25:20	17:28:40	3.3	T2W_MV_XD_tra	17:33:45	17:36:23	2.6	3D_T1_KM_mDIXON_sag	17:36:26	17:42:12	5.8
2017	8	Brain	nvc_base	30.4	9.9	40.4	28.5	1.9	11.9	4.6	9.6	44.7	CoilSurveyScan	12:29:51	12:29:59	0.1	SenseRefScan	12:30:03	12:30:13	0.2	SmartBrain	12:30:17	12:30:52	0.6	DWI_tra 3mm	12:31:57	12:34:39	2.7	FLAIR_3D_sag	12:34:48	12:40:04	5.3	3D_T1_NATIV_mDIXON_sag	12:40:26	12:46:08	5.7	Small DWI_Pons_ZOOM_Tra	12:46:11	12:52:32	6.3	SWIp	12:52:37	12:57:36	5	T2_MV_XD_tra	12:57:40	13:00:17	2.6
2017	8	Brain	sense_breast_7m_aci	29.3	10	39.3	25.1	4.2	14.2	9.9	9.6	48.9	CoilSurveyScan	16:26:23	16:26:31	0.1	SenseRefScan	16:26:36	16:26:45	0.2	SmartBrain	16:26:49	16:27:24	0.6	DWI_tra 3mm	16:27:53	16:30:25	2.5	FLAIR_3D_sag	16:30:28	16:35:43	5.2	SWIp	16:36:08	16:41:05	4.9	T1_FFE_tra	16:41:07	16:44:22	3.2	T2W_MV_XD_tra	16:47:23	16:50:01	2.6	3D_T1_KM_mDIXON_sag	16:50:04	16:55:40	5.6
2017	1	Brain	nvc_base	30	10	40.1	27.9	2.1	12.1	0.5	9.8	40.3	CoilSurveyScan	08:15:28	08:15:59	0.5	SenseRefScan	08:16:03	08:16:13	0.2	SmartBrain	08:16:17	08:16:52	0.6	DWI_tra 3mm	08:17:24	08:19:56	2.5	FLAIR_3D_sag	08:19:59	08:25:13	5.2	SWIp	08:25:16	08:30:13	4.9	3D_T1_NATIV_mDIXON_sag	08:30:16	08:35:56	5.7	T2W_MV_XD_tra	08:37:10	08:39:48	2.6	3D_T1_KM_mDIXON_sag	08:39:51	08:45:30	5.7
2017	10	Brain	sense_ankle_8_aci	39.5	10.1	49.6	35.2	4.3	14.4	0.8	3.5	43.9	CoilSurveyScan	14:56:26	14:56:34	0.1	SenseRefScan	14:56:38	14:56:48	0.2	SmartBrain	14:56:51	14:57:26	0.6	CoilSurveyScan	14:57:57	14:58:01	0.1	FLAIR_longTR	14:58:05	15:02:13	4.1	T1_TSE_sag	15:02:25	15:05:19	2.9	T2_TSE_cor	15:06:28	15:11:08	4.7	T1_TSE_cor	15:11:13	15:15:04	3.8	STIR_MV_XD_cor	15:15:08	15:18:11	3	T1_Dyn_TSE
2017	7	Brain	sense_ankle_8_aci	23.3	10.2	33.6	21.8	1.5	11.8	0.7	2.8	26.9	CoilSurveyScan	13:59:11	13:59:18	0.1	SenseRefScan	13:59:23	13:59:32	0.2	SmartBrain	13:59:36	14:00:11	0.6	DWI_tra 3mm	14:00:47	14:03:19	2.5	FLAIR_3D_sag	14:03:22	14:08:36	5.2	SWIp	14:09:03	14:14:00	4.9	T2W_MV_XD_tra	14:14:03	14:16:41	2.6	3D_T1_NATIV_mDIXON_sag	14:16:55	14:22:31	5.6
2017	3	Brain	sense_breast_7m_aci	27.1	10.2	37.3	25.3	1.8	12.1	4.5	4.3	35.9	CoilSurveyScan	08:50:21	08:50:29	0.1	SenseRefScan	08:50:33	08:50:43	0.2	SmartBrain	08:50:46	08:51:22	0.6	DWI_tra 3mm	08:51:51	08:54:24	2.5	FLAIR_3D_sag	08:54:31	08:59:47	5.3	SWIp	08:59:53	09:04:49	4.9	T1_FFE_tra	09:04:52	09:08:08	3.3	T2_MV_XD_tra	09:09:01	09:11:39	2.6	3D_T1_KM_mDIXON_sag	09:11:45	09:17:28	5.7
2017	6	Brain	nvc_base	62.2	10.3	72.6	48.6	13.7	24	12.9	6.2	81.4	CoilSurveyScan	12:40:07	12:40:15	0.1	SenseRefScan	12:40:19	12:40:29	0.2	SmartBrain	12:40:33	12:41:08	0.6	CoilSurveyScan	12:44:12	12:44:17	0.1	SenseRefScan	12:44:22	12:44:31	0.2	SmartBrain	12:44:34	12:45:07	0.6	DWI_tra 3mm	12:46:13	12:48:55	2.7	SenseRefScan	12:53:26	12:53:37	0.2	FLAIR_3D_sag	12:53:39	12:58:55	5.3	TOF_3D_tra
2017	5	Brain	posterior	25.8	10.4	36.2	22.7	3.2	13.6	1	7.8	34.6	CoilSurveyScan	10:14:38	10:14:46	0.1	SenseRefScan	10:14:50	10:15:00	0.2	SmartBrain	10:15:04	10:15:39	0.6	DWI_tra 3mm	10:16:16	10:18:48	2.5	FLAIR_3D_sag	10:18:50	10:24:04	5.2	TOF_3D_tra	10:24:07	10:28:07	4	SWIp	10:28:11	10:33:07	4.9	CoilSurveyScan	10:34:38	10:34:43	0.1	SenseRefScan	10:34:48	10:35:01	0.2	SURVEY_PCA
2017	8	Brain	nvc_base	24.4	10.6	35	21.9	2.5	13.1	12.8	5.7	42.9	CoilSurveyScan	14:56:00	14:56:07	0.1	SenseRefScan	14:56:11	14:56:21	0.2	SmartBrain	14:56:25	14:57:00	0.6	DWI_tra 3mm	14:58:46	15:01:28	2.7	FLAIR_3D_sag	15:01:31	15:06:45	5.2	3D_T1_NATIV_mDIXON_sag	15:07:01	15:12:34	5.5	SWIp	15:12:37	15:17:34	4.9	T2_MV_XD_tra	15:17:48	15:20:26	2.6
2017	1	Brain	sense_knee_16_aci	42.7	10.6	53.3	36.8	5.9	16.5	0.3	7.5	50.6	CoilSurveyScan	07:33:47	07:34:18	0.5	SenseRefScan	07:34:23	07:34:32	0.2	SmartBrain	07:34:36	07:35:11	0.6	DWI_tra 3mm	07:35:54	07:38:26	2.5	FLAIR_3D_sag	07:38:28	07:43:43	5.2	SWIp	07:44:12	07:49:09	4.9	TOF_3D_tra	07:49:12	07:53:12	4	T1_FFE_tra	07:53:14	07:56:31	3.3	T2_MV_XD_tra	07:56:34	07:59:12	2.6	PCA_3D_cor_Venc 30
2017	5	Brain	posterior	56.8	10.6	67.4	51.3	5.5	16.1	3.6	5	65.5	CoilSurveyScan	11:23:54	11:24:01	0.1	SenseRefScan	11:24:06	11:24:16	0.2	SmartBrain	11:24:19	11:24:55	0.6	CoilSurveyScan	11:27:01	11:27:06	0.1	SenseRefScan	11:27:10	11:27:19	0.2	DWIBS_b_0_800	11:27:23	11:34:10	6.8	T1_TSE_cor	11:34:21	11:38:37	4.3	T1_TSE_tra	11:39:42	11:43:55	4.2	T2W_MV_XD_tra	11:44:00	11:47:23	3.4	SenseRefScan
2017	3	Brain	nvc_base	58.5	10.6	69.1	52.5	5.9	16.6	1	10.4	69.8	CoilSurveyScan	08:37:53	08:38:00	0.1	SenseRefScan	08:38:05	08:38:15	0.2	SmartBrain	08:38:18	08:38:54	0.6	CoilSurveyScan	08:40:54	08:40:58	0.1	DWIBS_b_0_800	08:41:03	08:47:50	6.8	T1_TSE_cor	08:47:53	08:52:09	4.3	T1_TSE_tra	08:52:17	08:56:46	4.5	T2W_MV_XD_tra	08:56:51	09:00:14	3.4	SenseRefScan	09:00:17	09:00:29	0.2	T2W_MV_XD_cor
2017	11	Brain	sense_knee_16_aci	32.7	10.7	43.3	30.2	2.4	13.1	5.1	10.3	48.1	CoilSurveyScan	16:01:53	16:02:01	0.1	SenseRefScan	16:02:06	16:02:15	0.2	SmartBrain	16:02:18	16:02:54	0.6	DWI_tra 3mm	16:03:30	16:06:02	2.5	FLAIR_3D_sag	16:06:05	16:11:19	5.2	SWIp	16:11:22	16:16:19	5	T1_FFE_tra	16:16:22	16:19:37	3.2	T2_MV_XD_tra	16:20:34	16:23:12	2.6	3D_T1_BrainVIEW_BB_KM_MSDE	16:23:45	16:28:56	5.2	3D_T1_KM_mDIXON_sag
2017	11	Brain	posterior	31.3	10.9	42.3	28.9	2.4	13.4	3.2	10.7	45.3	CoilSurveyScan	16:53:43	16:53:50	0.1	SenseRefScan	16:53:55	16:54:04	0.2	SmartBrain	16:54:08	16:54:43	0.6	DWI_tra 3mm	16:55:29	16:58:11	2.7	CoilSurveyScan	16:58:30	16:58:35	0.1	SenseRefScan	16:58:39	16:58:48	0.2	FLAIR_3D_sag	16:58:52	17:04:06	5.2	3D_T1_NATIV_mDIXON_sag	17:04:09	17:09:51	5.7	CoilSurveyScan	17:10:07	17:10:11	0.1	SenseRefScan
2017	2	Brain	anterior	31.4	10.9	42.2	25.3	6.1	16.9	5.7	10.4	47.5	CoilSurveyScan	08:36:43	08:36:50	0.1	SenseRefScan	08:36:55	08:37:04	0.2	SmartBrain	08:37:08	08:37:44	0.6	DWI_tra 3mm	08:38:42	08:41:14	2.5	FLAIR_3D_sag	08:41:22	08:46:38	5.3	SWIp	08:46:44	08:51:40	4.9	T1_FFE_tra	08:52:10	08:55:25	3.3	T2W_MV_XD_tra	08:59:37	09:02:15	2.6	3D_T1_KM_mDIXON_sag	09:02:20	09:08:05	5.7
2017	11	Brain	anterior	40.4	11	51.4	38.1	2.3	13.3	0.5	10.6	51.4	CoilSurveyScan	17:19:09	17:19:16	0.1	SenseRefScan	17:19:21	17:19:30	0.2	SmartBrain	17:19:34	17:20:09	0.6	DWI_tra 3mm	17:20:46	17:23:18	2.5	FLAIR_3D_sag	17:23:21	17:28:36	5.2	TOF_3D_tra	17:28:38	17:32:38	4	SWIp	17:32:52	17:37:49	4.9	T2_DRIVE_HR_tra	17:37:52	17:43:22	5.5	T1_FFE_tra	17:43:25	17:46:40	3.2	T2_MV_XD_tra
2017	6	Brain	posterior	27.3	11.1	38.4	26	1.3	12.4	0.2	6.4	33.9	CoilSurveyScan	11:47:25	11:47:32	0.1	SenseRefScan	11:47:37	11:47:46	0.2	SmartBrain	11:47:50	11:48:25	0.6	DWI_tra 3mm	11:49:01	11:51:33	2.5	FLAIR_3D_sag	11:51:36	11:56:51	5.2	SWIp	11:56:54	12:01:50	4.9	3D_Brain_VIEW_T2	12:01:53	12:06:10	4.3	3D_T1_NATIV_mDIXON_sag	12:06:31	12:12:04	5.5	T2W_MV_XD_tra	12:12:07	12:14:45	2.6
2017	8	Brain	anterior	37.8	11.1	48.9	35.9	1.9	13	0.2	10.7	48.7	CoilSurveyScan	15:17:45	15:17:53	0.1	SenseRefScan	15:17:57	15:18:07	0.2	SmartBrain	15:18:10	15:18:45	0.6	DWI_tra 3mm	15:19:35	15:22:07	2.5	FLAIR_3D_sag	15:22:17	15:27:34	5.3	Small DWI_Hippo_ZOOM_Tra	15:27:39	15:33:31	5.9	SWIp	15:33:33	15:38:30	4.9	T2_MV_sag	15:38:55	15:43:34	4.7	3D_Nativ_T1_mDIXON_sag	15:43:37	15:49:18	5.7	T2W_MV_XD_Hippocampus_cor
2017	6	Brain	sense_small_extr_8_aci	39.8	11.1	50.9	36.4	3.4	14.5	20.4	6.2	66.4	CoilSurveyScan	12:47:18	12:47:26	0.1	SenseRefScan	12:47:30	12:47:40	0.2	SmartBrain	12:47:43	12:48:19	0.6	DWI_tra 3mm	12:49:36	12:52:08	2.5	FLAIR_3D_sag	12:52:11	12:57:26	5.2	SWIp	12:57:49	13:02:46	4.9	Small DWI_Pons_ZOOM_Tra	13:02:49	13:08:40	5.9	T2_DRIVE_HR_tra	13:08:43	13:14:13	5.5	T1_FFE_tra	13:14:16	13:17:29	3.2	T2_MV_XD_tra
2017	9	Brain	anterior	49.3	11.1	60.4	45.5	3.8	14.9	3.9	9.7	63	CoilSurveyScan	14:25:11	14:25:19	0.1	SenseRefScan	14:25:24	14:25:33	0.2	SmartBrain	14:25:37	14:26:12	0.6	DWI_tra 3mm	14:26:50	14:29:22	2.5	FLAIR_3D_sag	14:29:25	14:34:39	5.2	TOF_3D_tra	14:35:02	14:39:03	4	SWIp	14:39:05	14:44:02	4.9	T1_FFE_tra	14:44:04	14:47:18	3.2	T2_DRIVE_HR_tra	14:47:21	14:52:51	5.5	T2_MV_XD_tra
2017	3	Brain	anterior	22.9	11.2	34.1	21.8	1.1	12.3	5.8	5.2	33.9	CoilSurveyScan	10:30:11	10:30:19	0.1	SenseRefScan	10:30:23	10:30:33	0.2	SmartBrain	10:30:37	10:31:12	0.6	DWI_tra 3mm	10:31:37	10:34:09	2.5	FLAIR_3D_sag	10:34:12	10:39:26	5.2	3D_T1_NATIV_mDIXON_sag	10:39:30	10:45:05	5.6	SWIp	10:45:07	10:50:04	4.9	T2_MV_XD_tra	10:50:28	10:53:06	2.6
2017	5	Brain	nvc_base	28.8	11.2	40	27.7	1.1	12.3	0.2	10.8	39.8	CoilSurveyScan	11:54:43	11:54:51	0.1	SenseRefScan	11:54:56	11:55:05	0.2	SmartBrain	11:55:09	11:55:44	0.6	DWI_tra 3mm	11:56:07	11:58:40	2.5	FLAIR_3D_sag	11:58:42	12:03:56	5.2	3D_T1_NATIV_mDIXON_sag	12:03:59	12:09:38	5.6	Small DWI_Pons_ZOOM_Tra	12:09:40	12:15:32	5.9	SWIp	12:15:56	12:20:52	4.9	T2_MV_XD_tra	12:20:56	12:23:34	2.6
2017	12	Brain	anterior	28.8	11.2	40	25.2	3.6	14.8	7.2	10.7	46.8	CoilSurveyScan	15:24:33	15:24:41	0.1	SenseRefScan	15:24:45	15:24:55	0.2	SmartBrain	15:24:58	15:25:34	0.6	DWI_tra 3mm	15:26:16	15:28:55	2.6	FLAIR_3D_sag	15:28:57	15:34:12	5.2	SWIp	15:34:15	15:39:12	5	T1_FFE_tra	15:39:15	15:42:30	3.2	T2W_MV_XD_tra	15:45:05	15:47:43	2.6	3D_T1_KM_mDIXON_sag	15:47:46	15:53:24	5.6
2017	3	Brain	sense_breast_7m_aci	39.9	11.2	51.1	36.3	3.6	14.8	4.9	8.8	53.6	CoilSurveyScan	08:48:23	08:48:30	0.1	SenseRefScan	08:48:35	08:48:44	0.2	SmartBrain	08:48:48	08:49:23	0.6	DWI_tra 3mm	08:50:15	08:52:48	2.5	FLAIR_3D_sag	08:52:50	08:58:05	5.2	SWIp	08:58:08	09:03:05	4.9	TOF_3D_tra	09:03:57	09:07:57	4	T1_FFE_tra	09:08:00	09:11:15	3.3	T2_MV_XD_tra	09:11:18	09:13:56	2.6	CoilSurveyScan
2017	3	Brain	anterior	71.9	11.2	83.1	56.1	15.8	27	0.7	5.5	78.1	CoilSurveyScan	08:57:55	08:58:03	0.1	SenseRefScan	08:58:07	08:58:19	0.2	SenseRefScan	08:58:24	08:58:34	0.2	SURVEY	08:58:38	08:59:12	0.6	DWIBS_b_0_800	09:01:01	09:07:49	6.8	SenseRefScan	09:08:35	09:08:45	0.2	STIR_MV_XD_cor	09:08:48	09:14:42	5.9	CoilSurveyScan	09:18:05	09:18:09	0.1	SenseRefScan	09:18:14	09:18:23	0.2	T1_TSE_cor
2017	7	Brain	nvc_base	23.2	11.4	34.6	21.9	1.3	12.7	2.4	11.1	36.8	CoilSurveyScan	13:05:48	13:05:55	0.1	SenseRefScan	13:06:00	13:06:09	0.2	SmartBrain	13:06:13	13:06:48	0.6	DWI_tra 3mm	13:07:17	13:09:51	2.6	FLAIR_3D_sag	13:09:54	13:15:08	5.2	SWIp	13:15:11	13:20:09	5	3D_T1_NATIV_mDIXON_sag	13:20:43	13:26:20	5.6	T2W_MV_XD_tra	13:26:24	13:29:02	2.6
2017	9	Brain	sense_shoulder8_dci	27.8	11.4	39.2	25.1	2.7	14.1	0.9	7.2	35.9	CoilSurveyScan	15:39:18	15:39:26	0.1	SenseRefScan	15:39:30	15:39:40	0.2	SmartBrain	15:39:43	15:40:19	0.6	DWI_tra 3mm	15:41:00	15:43:35	2.6	FLAIR_3D_sag	15:43:37	15:48:52	5.2	SWIp	15:48:55	15:53:53	5	T1_FFE_tra	15:53:56	15:57:10	3.2	T2_MV_XD_tra	15:58:51	16:01:30	2.6	3D_T1_KM_mDIXON_sag	16:01:32	16:07:09	5.6
2017	6	Brain	nvc_base	27.2	11.5	38.6	25	2.2	13.6	8.9	9	45	CoilSurveyScan	12:27:10	12:27:17	0.1	SenseRefScan	12:27:22	12:27:32	0.2	SmartBrain	12:27:35	12:28:10	0.6	DWI_tra 3mm	12:28:46	12:31:18	2.5	FLAIR_3D_sag	12:31:21	12:36:36	5.2	SWIp	12:36:38	12:41:35	4.9	T1_FFE_tra	12:41:56	12:45:10	3.2	T2_MV_XD_tra	12:46:07	12:48:45	2.6	3D_T1_KM_mDIXON_sag	12:48:48	12:54:20	5.5
2017	11	Brain	nvc_base	49.7	11.5	61.2	46	3.6	15.2	0.2	8.7	58.7	CoilSurveyScan	17:46:22	17:46:30	0.1	SenseRefScan	17:46:34	17:46:44	0.2	SmartBrain	17:46:47	17:47:23	0.6	DWI_tra 3mm	17:47:57	17:50:29	2.5	FLAIR_3D_sag	17:50:32	17:55:47	5.2	SWIp	17:55:49	18:00:46	4.9	TOF_3D_tra	18:00:48	18:04:49	4	Small DWI_Pons_ZOOM_Tra	18:04:52	18:10:44	5.9	T1_FFE_tra	18:10:46	18:13:59	3.2	CoilSurveyScan
2017	4	Brain	anterior	60.9	11.5	72.4	55.4	5.6	17.1	13.6	9.1	83.6	CoilSurveyScan	10:30:35	10:30:42	0.1	SenseRefScan	10:30:47	10:30:56	0.2	SmartBrain	10:30:59	10:31:35	0.6	DWI_tra 3mm	10:32:15	10:34:47	2.5	FLAIR_3D_sag	10:34:58	10:40:14	5.3	SWIp	10:40:20	10:45:17	5	T1_FFE_tra	10:45:20	10:48:38	3.3	T2_DRIVE_HR_sag	10:48:55	10:55:37	6.7	T2_MV_XD_tra	10:55:40	10:58:17	2.6	CoilSurveyScan
2017	14	Brain	anterior	15.6	11.6	27.2	14.1	1.5	13.1	8.4	4.9	28.8	CoilSurveyScan	16:38:53	16:39:01	0.1	SenseRefScan	16:39:05	16:39:15	0.2	SmartBrain	16:39:18	16:39:53	0.6	CoilSurveyScan	16:40:33	16:40:38	0.1	SenseRefScan	16:40:42	16:40:56	0.2	SenseRefScan	16:41:02	16:41:14	0.2	SURVEY	16:41:19	16:41:56	0.6	SURVEY_PCA	16:41:59	16:42:23	0.4	CoilSurveyScan	16:42:27	16:42:31	0.1	SenseRefScan
2017	3	Brain	sense_breast_7m_aci	29.3	11.6	40.8	25.2	4.1	15.6	4.2	7.6	41.2	CoilSurveyScan	09:11:03	09:11:10	0.1	SenseRefScan	09:11:15	09:11:24	0.2	SmartBrain	09:11:28	09:12:03	0.6	DWI_tra 3mm	09:13:16	09:15:48	2.5	FLAIR_3D_sag	09:15:56	09:21:12	5.3	SWIp	09:22:04	09:27:01	4.9	T1_FFE_tra	09:27:04	09:30:19	3.3	T2_MV_XD_tra	09:31:56	09:34:34	2.6	3D_T1_KM_mDIXON_sag	09:34:39	09:40:19	5.7
2017	8	Brain	nvc_base	44.3	11.7	55.9	40.8	3.4	15.1	1.9	5.8	52	CoilSurveyScan	14:05:44	14:05:52	0.1	SenseRefScan	14:05:56	14:06:05	0.2	SmartBrain	14:06:09	14:06:44	0.6	DWI_tra 3mm	14:07:23	14:09:55	2.5	FLAIR_3D_sag	14:09:57	14:15:12	5.2	TOF_3D_tra	14:15:14	14:19:14	4	SWIp	14:19:17	14:24:14	4.9	T1_FFE_tra	14:24:17	14:27:31	3.2	T2_MV_XD_tra	14:27:34	14:30:12	2.6	CoilSurveyScan
2017	11	Brain	sense_ankle_8_aci	44.4	11.7	56.1	41.6	2.8	14.5	5.9	11.5	61.8	CoilSurveyScan	17:41:43	17:41:50	0.1	SenseRefScan	17:41:55	17:42:04	0.2	SmartBrain	17:42:08	17:42:43	0.6	DWI_tra 3mm	17:43:11	17:45:43	2.5	FLAIR_3D_sag	17:45:46	17:51:01	5.2	3D_DIR_sag	17:51:03	17:57:58	6.9	SWIp	17:58:01	18:02:06	4.1	T2_mDIXON_cor	18:02:36	18:06:41	4.1	T2_DRIVE_tra	18:06:43	18:12:13	5.5	T2_MV_XD_tra
2017	5	Brain	sense_breast_7m_aci	29.2	11.8	41	25	4.2	16	1	9.8	39.9	CoilSurveyScan	11:10:06	11:10:14	0.1	SenseRefScan	11:10:18	11:10:28	0.2	SmartBrain	11:10:32	11:11:07	0.6	DWI_tra 3mm	11:12:05	11:14:38	2.5	FLAIR_3D_sag	11:14:40	11:19:55	5.2	SWIp	11:19:58	11:24:55	4.9	T1_FFE_tra	11:25:06	11:28:20	3.2	T2W_MV_XD_tra	11:31:02	11:33:41	2.6	3D_T1_KM_mDIXON_sag	11:33:43	11:39:16	5.5
2017	8	Brain	anterior	37.1	11.8	48.9	34	3.1	14.9	0.2	7.9	45.2	CoilSurveyScan	13:26:47	13:26:55	0.1	SenseRefScan	13:26:59	13:27:09	0.2	SmartBrain	13:27:12	13:27:48	0.6	DWI_tra 3mm	13:28:31	13:31:03	2.5	FLAIR_3D_sag	13:31:21	13:36:36	5.2	SWIp	13:36:58	13:41:54	4.9	T1_FFE_tra	13:41:57	13:45:09	3.2	T2_DRIVE_tra	13:45:11	13:50:41	5.5	T2_MV_XD_tra	13:52:03	13:54:41	2.6	T1_KM_TSE_tra
2017	1	Brain	sense_knee_16_aci	63.3	11.9	75.2	53.3	10	21.9	16.8	2.6	82.7	CoilSurveyScan	07:47:03	07:47:34	0.5	SenseRefScan	07:47:39	07:47:48	0.2	SmartBrain	07:47:52	07:48:28	0.6	CoilSurveyScan	07:49:40	07:49:44	0.1	SenseRefScan	07:49:48	07:49:57	0.2	DWIBS_b_0_800	07:50:00	07:56:46	6.8	T2W_MV_XD_tra	07:57:45	08:01:08	3.4	CoilSurveyScan	08:04:10	08:04:15	0.1	T1_TSE_tra	08:04:19	08:09:03	4.7	T1_TSE_cor
2017	10	Brain	sense_breast_7m_aci	47.8	12	59.8	40.8	7.1	19.1	0.7	7.3	55.8	CoilSurveyScan	16:15:13	16:15:20	0.1	SenseRefScan	16:15:24	16:15:34	0.2	SmartBrain	16:15:38	16:16:13	0.6	DWI_tra 3mm	16:17:31	16:20:03	2.5	FLAIR_3D_sag	16:20:05	16:25:20	5.2	SWIp	16:25:37	16:30:33	4.9	T1_FFE_tra	16:30:36	16:33:49	3.2	TOF_3D_tra	16:33:52	16:33:56	0.1	TOF_3D_tra	16:34:21	16:38:21	4	CoilSurveyScan
2017	8	Brain	nvc_base	70	12.1	82.1	54	15.9	28	9.2	11	90.2	CoilSurveyScan	13:05:02	13:05:09	0.1	SenseRefScan	13:05:14	13:05:24	0.2	SmartBrain	13:05:27	13:06:02	0.6	DWI_tra 3mm	13:07:07	13:09:39	2.5	CoilSurveyScan	13:09:40	13:09:44	0.1	SenseRefScan	13:09:48	13:09:57	0.2	FLAIR_3D_sag	13:10:00	13:15:15	5.2	SWIp	13:15:17	13:20:14	4.9	CoilSurveyScan	13:22:19	13:22:23	0.1	SenseRefScan
2017	8	Brain	anterior	40	12.2	52.2	36.5	3.5	15.7	11.5	12	63.5	CoilSurveyScan	13:25:21	13:25:28	0.1	SenseRefScan	13:25:33	13:25:44	0.2	SmartBrain	13:25:48	13:26:23	0.6	DWI_tra 3mm	13:27:06	13:29:38	2.5	FLAIR_3D_sag	13:29:41	13:34:55	5.2	Small DWI_Pons_ZOOM_Tra	13:34:59	13:41:19	6.3	SWIp	13:41:27	13:46:25	5	T1_FFE_tra	13:46:28	13:49:44	3.3	SWIp	13:50:24	13:55:20	4.9	T2_MV_XD_tra
2017	12	Brain	posterior	29.6	12.3	41.9	25.1	4.5	16.8	0.1	12	41.7	CoilSurveyScan	17:49:57	17:50:04	0.1	SenseRefScan	17:50:09	17:50:18	0.2	SmartBrain	17:50:22	17:50:57	0.6	DWI_tra 3mm	17:52:04	17:54:37	2.5	FLAIR_3D_sag	17:54:40	17:59:55	5.2	SWIp	17:59:57	18:04:54	4.9	T1_FFE_tra	18:04:57	18:04:58	0	T1_FFE_tra	18:05:51	18:09:05	3.2	T2_MV_XD_tra	18:11:16	18:13:55	2.6	3D_T1_KM_mDIXON_sag
2017	11	Brain	sense_breast_7m_aci	66.2	12.3	78.6	61.5	4.8	17.1	11.1	7.8	85.1	CoilSurveyScan	16:00:55	16:01:03	0.1	SenseRefScan	16:01:08	16:01:18	0.2	SmartBrain	16:01:21	16:01:57	0.6	DWI_tra 3mm	16:03:05	16:05:37	2.5	FLAIR_3D_sag	16:05:40	16:10:55	5.2	SWIp	16:10:58	16:15:54	4.9	T1_FFE_tra	16:15:57	16:19:10	3.2	T2_MV_XD_tra	16:19:13	16:21:51	2.6	CoilSurveyScan	16:22:09	16:22:14	0.1	SenseRefScan
2017	2	Brain	sense_breast_7m_aci	40	12.6	52.6	36.3	3.6	16.2	1.3	11	52.3	CoilSurveyScan	08:46:33	08:46:40	0.1	SenseRefScan	08:46:44	08:46:54	0.2	SmartBrain	08:46:58	08:47:33	0.6	DWI_tra 3mm	08:48:34	08:51:06	2.5	CoilSurveyScan	08:51:07	08:51:11	0.1	SenseRefScan	08:51:15	08:51:19	0.1	SenseRefScan	08:51:36	08:51:46	0.2	FLAIR_3D_sag	08:51:49	08:57:03	5.2	SWIp	08:57:06	09:02:03	4.9	CoilSurveyScan
2017	3	Brain	nvc_base	25.9	12.7	38.6	22.4	3.5	16.2	7.9	3.2	37	CoilSurveyScan	09:55:56	09:56:04	0.1	SenseRefScan	09:56:08	09:56:18	0.2	SmartBrain	09:56:21	09:56:57	0.6	DWI_tra 3mm	09:58:22	10:01:06	2.7	SenseRefScan	10:01:08	10:01:18	0.2	FLAIR_3D_sag	10:01:21	10:06:36	5.2	3D_T1_NATIV_mDIXON_sag	10:06:38	10:12:23	5.8	SWIp	10:13:33	10:13:38	0.1	SWIp	10:14:06	10:19:02	4.9	T2_MV_XD_tra
2017	9	Brain	nvc_base	44.7	12.7	57.4	39.4	5.3	18	17.7	9.3	71.7	CoilSurveyScan	15:39:39	15:39:46	0.1	SenseRefScan	15:39:50	15:40:00	0.2	SmartBrain	15:40:04	15:40:39	0.6	DWI_tra 3mm	15:41:52	15:44:31	2.6	CoilSurveyScan	15:44:32	15:44:36	0.1	SenseRefScan	15:44:40	15:44:49	0.2	FLAIR_3D_sag	15:44:52	15:50:06	5.2	T1_3D_TFE_sag	15:50:09	15:55:50	5.7	3D_DIR_sag	15:55:53	16:02:47	6.9	SWIp
2017	13	Brain	anterior	74.7	12.8	87.6	65.3	9.4	22.3	0.4	12.6	87.7	CoilSurveyScan	16:01:39	16:01:46	0.1	SenseRefScan	16:01:51	16:02:01	0.2	SmartBrain	16:02:04	16:02:40	0.6	DWI_tra 3mm	16:03:13	16:05:45	2.5	FLAIR_3D_sag	16:05:47	16:11:02	5.2	SWIp	16:11:04	16:16:01	4.9	TOF_3D_tra	16:16:04	16:20:04	4	T1_FFE_tra	16:20:21	16:23:37	3.3	T2_MV_XD_tra	16:23:40	16:26:18	2.6	CoilSurveyScan
2017	2	Brain	posterior	24.1	13	37.1	20.4	3.7	16.7	10.7	12.8	47.6	CoilSurveyScan	08:33:13	08:33:20	0.1	SenseRefScan	08:33:25	08:34:26	1	SenseRefScan	08:35:34	08:35:59	0.4	SURVEY	08:36:02	08:36:38	0.6	CoilSurveyScan	08:37:40	08:37:45	0.1	SenseRefScan	08:37:49	08:38:14	0.4	CoilSurveyScan	08:38:21	08:38:25	0.1	SenseRefScan	08:38:29	08:38:55	0.4	T2_SSH_BH_tra	08:38:58	08:42:34	3.6	CoilSurveyScan
2017	1	Brain	posterior	50	13	63	45.2	4.8	17.7	22.5	12.5	85	CoilSurveyScan	07:49:42	07:50:13	0.5	SenseRefScan	07:50:18	07:50:27	0.2	SmartBrain	07:50:31	07:51:06	0.6	DWI_tra 3mm	07:51:46	07:54:20	2.6	SenseRefScan	07:54:43	07:54:54	0.2	FLAIR_3D_sag	07:54:56	08:00:11	5.2	3D_DIR_sag	08:00:39	08:07:34	6.9	SWIp	08:07:54	08:12:02	4.1	T2_DRIVE_tra	08:12:05	08:17:35	5.5	T2_MV_XD_tra
2017	5	Brain	nvc_base	32.6	13.1	45.8	30.2	2.5	15.6	1.8	8.7	43.1	CoilSurveyScan	11:42:59	11:43:07	0.1	SenseRefScan	11:43:11	11:43:21	0.2	SmartBrain	11:43:24	11:43:59	0.6	DWI_tra 3mm	11:44:39	11:47:11	2.5	FLAIR_3D_sag	11:47:14	11:52:29	5.2	SWIp	11:52:32	11:57:29	4.9	T1_FFE_tra	11:57:32	12:00:47	3.3	T2_MV_XD_tra	12:02:14	12:04:52	2.6	3D_T1_KM_mDIXON_sag	12:04:55	12:10:30	5.6	FLAIR_3D_post KM sag
2017	14	Brain	posterior	34.7	13.2	47.9	32	2.6	15.9	0.2	13	47.9	CoilSurveyScan	17:27:21	17:27:29	0.1	SenseRefScan	17:27:33	17:27:43	0.2	SmartBrain	17:27:46	17:28:22	0.6	DWI_tra 3mm	17:29:09	17:31:42	2.5	FLAIR_3D_sag	17:31:44	17:36:58	5.2	SWIp	17:37:01	17:41:58	5	T1_FFE_tra	17:42:08	17:45:25	3.3	T2_MV_XD_tra	17:46:48	17:49:26	2.6	PCA_3D_cor_Venc 30	17:49:29	17:56:20	6.9	3D_T1_KM_mDIXON_sag
2017	11	Brain	nvc_base	32.4	13.4	45.8	25.8	6.7	20.1	0.2	13.1	45.7	CoilSurveyScan	17:59:56	18:00:30	0.6	SenseRefScan	18:00:35	18:00:45	0.2	SmartBrain	18:00:48	18:01:24	0.6	DWI_tra 3mm	18:02:28	18:05:15	2.8	FLAIR_3D_sag	18:05:18	18:05:19	0	FLAIR_3D_sag	18:05:40	18:10:55	5.2	SWIp	18:10:57	18:15:53	4.9	T1_FFE_tra	18:15:56	18:19:10	3.2	T2W_MV_XD_tra	18:24:06	18:26:45	2.6	3D_T1_KM_mDIXON_sag
2017	5	Brain	nvc_base	27.5	13.6	41.1	25.3	2.2	15.8	5.2	7	39.7	CoilSurveyScan	11:46:22	11:46:30	0.1	SenseRefScan	11:46:34	11:46:44	0.2	SmartBrain	11:46:48	11:47:23	0.6	DWI_tra 3mm	11:47:51	11:50:24	2.5	FLAIR_3D_sag	11:50:40	11:55:57	5.3	SWIp	11:56:03	12:01:02	5	T1_FFE_tra	12:01:05	12:04:19	3.2	T2_MV_XD_tra	12:05:26	12:08:04	2.6	3D_T1_KM_mDIXON_sag	12:08:10	12:13:55	5.7
2017	4	Brain	sense_breast_7m_aci	27.6	13.6	41.2	25.2	2.4	16	5.7	13.2	46.5	CoilSurveyScan	11:13:34	11:13:47	0.2	SenseRefScan	11:13:51	11:14:00	0.2	SmartBrain	11:14:04	11:14:39	0.6	DWI_tra 3mm	11:15:03	11:17:36	2.5	FLAIR_3D_sag	11:17:38	11:22:53	5.2	SWIp	11:22:55	11:27:53	5	T1_FFE_tra	11:27:56	11:31:10	3.2	T2W_MV_XD_tra	11:32:21	11:34:59	2.6	3D_T1_KM_mDIXON_sag	11:35:32	11:41:09	5.6
2017	3	Brain	nvc_base	34.7	13.6	48.3	31.2	3.5	17.1	7.3	8	50	CoilSurveyScan	10:40:37	10:40:45	0.1	SenseRefScan	10:40:49	10:40:59	0.2	SmartBrain	10:41:02	10:41:38	0.6	FLAIR_longTR	10:42:19	10:46:23	4.1	T1_TSE_sag	10:46:26	10:49:20	2.9	T2_TSE_cor	10:50:20	10:54:31	4.2	T1_TSE_cor	10:54:35	10:58:26	3.8	T1_Dyn_TSE	10:59:05	11:02:01	2.9	T1_KM_TSE_cor	11:02:05	11:05:54	3.8	T1_KM_TSE_sag
2017	10	Brain	sense_wrist_8_aci	34.4	13.7	48.2	32.1	2.3	16	2.4	2.9	39.7	CoilSurveyScan	15:06:01	15:06:09	0.1	SenseRefScan	15:06:13	15:06:23	0.2	SmartBrain	15:06:26	15:07:02	0.6	DWI_tra 3mm	15:07:53	15:10:25	2.5	FLAIR_3D_sag	15:10:33	15:15:50	5.3	SWIp	15:15:56	15:20:55	5	T1_FFE_tra	15:20:57	15:24:14	3.3	T2_MV_XD_tra	15:24:18	15:26:56	2.6	PCA_3D_cor_Venc 30	15:27:50	15:34:44	6.9	3D_T1_KM_mDIXON_sag
2017	12	Brain	nvc_base	38.4	13.7	52.1	34.4	4	17.7	10.6	13.2	62.1	CoilSurveyScan	17:46:21	17:46:29	0.1	SenseRefScan	17:46:34	17:46:43	0.2	SmartBrain	17:46:47	17:47:22	0.6	DWI_tra 3mm	17:48:21	17:50:53	2.5	FLAIR_3D_sag	17:50:56	17:56:11	5.2	SWIp	17:56:13	18:01:10	5	T1_FFE_tra	18:01:29	18:04:42	3.2	TOF_3D_tra	18:04:45	18:08:46	4	T2_MV_XD_tra	18:10:50	18:13:28	2.6	3D_T1_KM_BrainVIEW_BB_MSDE
2017	8	Brain	sense_breast_7m_aci	66.8	13.7	80.5	60.4	6.4	20.1	4.7	13.4	84.9	CoilSurveyScan	14:41:13	14:41:21	0.1	SenseRefScan	14:41:25	14:41:34	0.2	SmartBrain	14:41:38	14:42:13	0.6	DWI_tra 3mm	14:42:58	14:45:31	2.5	FLAIR_3D_sag	14:45:33	14:50:47	5.2	SWIp	14:50:51	14:55:47	4.9	T1_FFE_tra	14:55:49	14:59:06	3.3	T2W_MV_XD_tra	14:59:09	15:01:47	2.6	CoilSurveyScan	15:02:25	15:02:32	0.1	SURVEY
2017	2	Brain	posterior	47.7	13.8	61.5	40.6	7.1	20.9	0.3	2.4	50.4	CoilSurveyScan	08:40:23	08:40:30	0.1	SenseRefScan	08:40:34	08:40:44	0.2	SmartBrain	08:40:47	08:41:23	0.6	FLAIR_longTR	08:42:14	08:42:47	0.5	FLAIR_longTR	08:43:41	08:47:34	3.9	T1_TSE_sag	08:47:44	08:51:34	3.8	T2_TSE_cor	08:52:54	08:57:09	4.3	T2_TSE_sag	08:57:17	09:01:41	4.4	T1_TSE_cor	09:01:50	09:05:51	4	T1W_TSE_Dyn
2017	4	Brain	sense_breast_7m_aci	23.5	14.1	37.6	22	1.5	15.6	6.5	13	43	CoilSurveyScan	11:08:00	11:08:07	0.1	SenseRefScan	11:08:12	11:08:21	0.2	SmartBrain	11:08:25	11:09:00	0.6	DWI_tra 3mm	11:09:43	11:12:15	2.5	FLAIR_3D_sag	11:12:41	11:17:58	5.3	3D_T1_NATIV_mDIXON_sag	11:18:00	11:23:42	5.7	SWIp	11:23:49	11:28:46	5	T2_MV_XD_tra	11:28:49	11:31:27	2.6
2017	4	Brain	nvc_base	33.6	14.1	47.7	29.8	3.8	18	18.2	3.5	55.3	CoilSurveyScan	11:43:39	11:44:13	0.6	Survey	11:44:18	11:44:38	0.3	SenseRefScan	11:46:03	11:46:13	0.2	DWI_tra 3mm	11:46:16	11:48:49	2.6	3D_DIR_sag	11:49:14	11:56:19	7.1	T1_3D_TFE_sag	11:56:22	11:56:23	0	T1_3D_TFE_sag	11:56:45	12:02:26	5.7	T2W_MV_XD_tra	12:03:47	12:06:25	2.6	FLAIR_3D_post KM sag	12:06:28	12:11:32	5.1	3D_T1_KM_mDIXON_sag
2017	1	Brain	sense_wrist_8_aci	34.1	14.1	48.2	31.6	2.6	16.7	6	13.5	53.6	CoilSurveyScan	07:31:07	07:31:38	0.5	SenseRefScan	07:31:43	07:31:53	0.2	SmartBrain	07:31:56	07:32:32	0.6	DWI_tra 3mm	07:33:52	07:36:24	2.5	FLAIR_3D_sag	07:36:27	07:41:41	5.2	SWIp	07:42:18	07:47:15	4.9	3D_T1_NATIV_mDIXON_sag	07:47:17	07:52:52	5.6	T2W_MV_XD_tra	07:53:11	07:55:49	2.6	3D_Brain_VIEW_T2	07:55:52	08:00:08	4.3	FLAIR_3D_sag
2017	9	Brain	anterior	83.1	14.1	97.1	64	19.1	33.1	12.1	10.4	105.7	CoilSurveyScan	16:27:08	16:27:16	0.1	SenseRefScan	16:27:20	16:28:08	0.8	CoilSurveyScan	16:34:18	16:34:25	0.1	SenseRefScan	16:34:30	16:34:40	0.2	SmartBrain	16:34:43	16:35:19	0.6	DWI_tra 3mm	16:36:00	16:38:32	2.5	FLAIR_3D_sag	16:38:35	16:43:49	5.2	TOF_3D_tra	16:44:28	16:48:28	4	SWIp	16:48:31	16:53:27	4.9	T1_FFE_tra
2017	13	Brain	posterior	36.3	14.3	50.6	34.3	2	16.3	6.3	6.8	49.5	CoilSurveyScan	18:18:48	18:18:55	0.1	SenseRefScan	18:19:00	18:19:09	0.2	SmartBrain	18:19:12	18:19:48	0.6	DWI_tra 3mm	18:20:16	18:22:48	2.5	FLAIR_3D_sag	18:22:51	18:28:05	5.2	SWIp	18:28:08	18:33:06	5	T2_mDIXON_cor	18:33:09	18:37:13	4.1	T1_TSE_cor	18:37:17	18:41:34	4.3	T2_MV_XD_tra	18:42:40	18:45:18	2.6	T1_KM_mDixon cor
2017	10	Brain	anterior	28	14.5	42.5	25.1	2.9	17.4	7.1	12.6	47.8	CoilSurveyScan	15:24:39	15:24:47	0.1	SenseRefScan	15:24:51	15:25:01	0.2	SmartBrain	15:25:04	15:25:39	0.6	DWI_tra 3mm	15:26:12	15:28:44	2.5	FLAIR_3D_sag	15:28:47	15:34:01	5.2	SWIp	15:34:05	15:39:01	4.9	T1_FFE_tra	15:39:04	15:42:19	3.3	T2_MV_XD_tra	15:44:19	15:46:58	2.6	3D_T1_KM_mDIXON_sag	15:47:00	15:52:40	5.7
2017	13	Brain	nvc_base	29.5	14.5	44	28.4	1.1	15.6	5.1	10.6	45.1	CoilSurveyScan	16:59:58	17:00:06	0.1	SenseRefScan	17:00:10	17:00:20	0.2	SmartBrain	17:00:23	17:00:59	0.6	DWI_tra 3mm	17:01:27	17:04:09	2.7	FLAIR_3D_sag	17:04:11	17:09:26	5.2	Small DWI_Pons_ZOOM_Tra	17:09:29	17:15:49	6.3	3D_T1_NATIV_mDIXON_sag	17:16:08	17:21:46	5.6	SWIp	17:21:49	17:26:46	4.9	T2_MV_XD_tra	17:26:48	17:29:26	2.6
2017	7	Brain	sense_breast_7m_aci	30.9	14.6	45.5	25.8	5.2	19.7	0.4	7.5	38.8	CoilSurveyScan	13:15:54	13:16:01	0.1	SenseRefScan	13:16:05	13:16:15	0.2	SmartBrain	13:16:19	13:16:54	0.6	DWI_tra 3mm	13:17:25	13:20:00	2.6	FLAIR_3D_sag	13:20:02	13:25:30	5.5	SWIp	13:25:33	13:30:31	5	T1_FFE_tra	13:30:34	13:33:48	3.2	T2W_MV_XD_tra	13:34:34	13:37:12	2.6	3D_T1_KM_mDIXON_sag	13:37:14	13:37:38	0.4	3D_T1_KM_mDIXON_sag
2017	14	Brain	posterior	31.6	14.6	46.2	29.1	2.5	17.1	7.7	8.1	47.4	CoilSurveyScan	18:48:50	18:48:57	0.1	SenseRefScan	18:49:03	18:49:12	0.2	SmartBrain	18:49:15	18:49:51	0.6	DWI_tra 3mm	18:50:34	18:53:06	2.5	FLAIR_3D_sag	18:53:09	18:58:23	5.2	SWIp	18:58:26	19:03:23	4.9	TOF_3D_tra	19:03:40	19:07:41	4	T1_FFE_tra	19:07:44	19:10:59	3.3	T2_MV_XD_tra	19:12:09	19:14:48	2.6	3D_T1_KM_mDIXON_sag
2017	6	Brain	sense_breast_7m_aci	26.7	14.8	41.5	21.7	5	19.8	5	8.3	40	CoilSurveyScan	12:10:25	12:10:33	0.1	SenseRefScan	12:10:38	12:10:47	0.2	SmartBrain	12:10:50	12:11:26	0.6	DWI_tra 3mm	12:12:08	12:14:42	2.6	FLAIR_3D_sag	12:14:45	12:19:59	5.2	3D_T1_NATIV_mDIXON_sag	12:20:02	12:25:46	5.7	SWIp	12:25:49	12:27:16	1.5	CoilSurveyScan	12:30:37	12:30:44	0.1	SenseRefScan	12:30:49	12:30:59	0.2	SmartBrain
2017	13	Brain	sense_ankle_8_aci	30.4	14.9	45.3	27.7	2.7	17.5	5.3	14.5	50.2	CoilSurveyScan	16:56:23	16:56:30	0.1	SenseRefScan	16:56:35	16:56:45	0.2	SmartBrain	16:56:48	16:57:24	0.6	DWI_tra 3mm	16:57:57	17:00:30	2.5	CoilSurveyScan	17:00:31	17:00:35	0.1	SenseRefScan	17:00:39	17:00:49	0.2	FLAIR_3D_sag	17:00:52	17:06:06	5.2	SWIp	17:06:08	17:11:05	4.9	3D_T1_NATIV_mDIXON_sag	17:11:08	17:16:46	5.6	T2W_MV_XD_tra
2017	1	Brain	nvc_base	32.1	15	47.1	25.6	6.6	21.5	0.7	7.3	40.1	CoilSurveyScan	07:34:45	07:35:16	0.5	SenseRefScan	07:35:20	07:35:30	0.2	SmartBrain	07:35:34	07:36:09	0.6	DWI_tra 3mm	07:37:03	07:39:35	2.5	FLAIR_3D_sag	07:39:44	07:45:01	5.3	SWIp	07:45:07	07:50:05	5	T1_FFE_tra	07:50:08	07:53:21	3.2	T2W_MV_XD_tra	07:54:44	07:57:22	2.6	3D_T1_KM_mDIXON_sag	08:01:15	08:06:54	5.7
2017	10	Brain	anterior	30	15.2	45.2	28.8	1.2	16.4	0.3	12.9	43.1	CoilSurveyScan	16:36:36	16:36:43	0.1	SenseRefScan	16:36:48	16:36:57	0.2	SmartBrain	16:37:01	16:37:36	0.6	DWI_tra 3mm	16:38:12	16:40:44	2.5	FLAIR_3D_sag	16:40:46	16:46:01	5.2	3D_DIR_sag	16:46:03	16:52:58	6.9	SWIp	16:53:14	16:58:10	4.9	T2W_MV_XD_tra	16:58:13	17:00:50	2.6	3D_T1_mDIXON_sag	17:00:53	17:06:33	5.7
2017	9	Brain	nvc_base	44.9	15.3	60.2	37.1	7.9	23.1	8.6	10.2	63.7	CoilSurveyScan	16:05:19	16:05:26	0.1	SenseRefScan	16:05:31	16:05:40	0.2	SmartBrain	16:05:44	16:06:19	0.6	DWI_tra 3mm	16:06:46	16:09:18	2.5	FLAIR_3D_sag	16:09:29	16:14:45	5.3	SWIp	16:14:52	16:19:50	5	T2_mDIXON_cor	16:21:01	16:25:55	4.9	CoilSurveyScan	16:28:49	16:28:54	0.1	SenseRefScan	16:28:57	16:29:07	0.2	T2_MV_XD_tra
2017	9	Brain	nvc_base	24.7	15.4	40.1	22	2.7	18.1	4.9	11.5	41.1	CoilSurveyScan	15:31:00	15:31:07	0.1	SenseRefScan	15:31:11	15:31:21	0.2	SmartBrain	15:31:24	15:32:00	0.6	DWI_tra 3mm	15:33:57	15:36:39	2.7	FLAIR_3D_sag	15:36:42	15:41:57	5.2	3D_T1_NATIV_mDIXON_sag	15:42:21	15:47:56	5.6	SWIp	15:47:59	15:52:56	5	T2_MV_XD_tra	15:53:04	15:55:42	2.6
2017	3	Brain	sense_ankle_8_aci	42.4	15.6	58	34.7	7.7	23.3	12.4	6.4	61.1	CoilSurveyScan	08:21:06	08:21:13	0.1	SenseRefScan	08:21:18	08:21:27	0.2	SmartBrain	08:21:31	08:22:06	0.6	T1_TSE_tra	08:23:08	08:27:21	4.2	T2W_MV_XD_tra	08:27:43	08:31:06	3.4	STIR_MV_XD_tra	08:31:09	08:35:24	4.2	CoilSurveyScan	08:35:54	08:35:59	0.1	SenseRefScan	08:36:03	08:36:16	0.2	T2_mDIXON_TSE_tra	08:36:20	08:40:18	4	T2_mDIXON_TSE_sag
2017	4	Brain	posterior	44.4	15.6	60	41.7	2.7	18.3	0.3	15.2	59.9	CoilSurveyScan	09:34:31	09:34:39	0.1	SenseRefScan	09:34:43	09:34:53	0.2	SmartBrain	09:34:57	09:35:32	0.6	DWI_tra 3mm	09:36:01	09:38:34	2.5	FLAIR_3D_sag	09:38:37	09:43:51	5.2	SWIp	09:43:54	09:47:59	4.1	T1_mDixon cor	09:48:02	09:52:19	4.3	T2_mDIXON_cor	09:52:22	09:56:16	3.9	T1_mDixon_tra	09:56:19	10:00:36	4.3	T2_MV_XD_tra
2017	15	Brain	nvc_base	14.7	15.9	30.6	13.9	0.8	16.7	6.7	15.7	37.1	CoilSurveyScan	17:06:04	17:06:11	0.1	SenseRefScan	17:06:15	17:06:25	0.2	SmartBrain	17:06:28	17:07:03	0.6	DWI_tra 3mm	17:07:35	17:10:09	2.6	CoilSurveyScan	17:10:09	17:10:13	0.1	SenseRefScan	17:10:18	17:10:27	0.2	FLAIR_3D_sag	17:10:30	17:15:44	5.2	SWIp	17:15:47	17:20:45	5
2017	12	Brain	nvc_base	48.7	15.9	64.6	38.2	10.5	26.4	13	11.8	73.5	CoilSurveyScan	18:32:42	18:33:16	0.6	SenseRefScan	18:33:21	18:33:31	0.2	SmartBrain	18:33:35	18:34:10	0.6	DWI_tra 3mm	18:35:01	18:37:33	2.5	FLAIR_3D_sag	18:37:51	18:43:06	5.2	SWIp	18:43:09	18:48:05	4.9	T1_FFE_tra	18:48:08	18:51:24	3.3	SWIp	18:51:27	18:52:23	0.9	TOF_3D_tra	18:52:29	18:56:29	4	T2_MV_XD_tra
2017	8	Brain	sense_small_extr_8_aci	39.3	16	55.2	35.9	3.4	19.4	6.6	10.3	56.1	CoilSurveyScan	14:48:12	14:48:20	0.1	SenseRefScan	14:48:24	14:48:34	0.2	SmartBrain	14:48:37	14:49:12	0.6	DWI_tra 3mm	14:49:50	14:52:22	2.5	FLAIR_3D_sag	14:52:24	14:57:39	5.2	SWIp	14:57:41	15:02:38	4.9	TOF_3D_tra	15:03:24	15:07:24	4	T1_FFE_tra	15:07:27	15:10:41	3.2	T2_MV_XD_tra	15:10:44	15:13:22	2.6	PCA_3D_cor_Venc 30
2017	1	Brain	posterior	35	16.1	51.1	32	3	19.1	5.8	6.7	47.4	CoilSurveyScan	07:45:36	07:46:07	0.5	SenseRefScan	07:46:12	07:46:22	0.2	SmartBrain	07:46:25	07:47:01	0.6	FLAIR_longTR	07:48:00	07:52:04	4.1	T1_TSE_sag	07:52:06	07:55:01	2.9	T2_TSE_cor	07:55:53	08:00:08	4.3	T1_TSE_cor	08:00:12	08:04:02	3.8	T1_Dyn_TSE	08:04:06	08:07:24	3.3	T1_KM_TSE_cor	08:07:26	08:11:17	3.8	T1_KM_TSE_sag
2017	1	Brain	sense_knee_16_aci	53.6	16.2	69.8	49.3	4.3	20.5	9.4	10.5	73.5	CoilSurveyScan	07:41:48	07:42:19	0.5	SenseRefScan	07:42:23	07:42:33	0.2	SURVEY	07:42:36	07:43:11	0.6	CoilSurveyScan	07:43:15	07:43:19	0.1	SenseRefScan	07:43:23	07:43:33	0.2	SmartBrain	07:43:37	07:44:14	0.6	DWI_tra 3mm	07:45:31	07:48:05	2.6	CoilSurveyScan	07:48:08	07:48:13	0.1	SenseRefScan	07:48:18	07:48:32	0.2	SenseRefScan
2017	4	Brain	sense_ankle_8_aci	23.5	16.3	39.8	22.3	1.2	17.6	0.5	6.4	30.4	CoilSurveyScan	09:54:49	09:54:57	0.1	SenseRefScan	09:55:02	09:55:11	0.2	SmartBrain	09:55:15	09:55:50	0.6	DWI_tra 3mm	09:56:26	09:59:08	2.7	FLAIR_3D_sag	09:59:19	10:04:36	5.3	3D_T1_NATIV_mDIXON_sag	10:04:39	10:10:20	5.7	SWIp	10:10:34	10:15:39	5.1	T2_MV_XD_tra	10:15:42	10:18:20	2.6
2017	6	Brain	sense_small_extr_8_aci	36.2	16.3	52.5	32.1	4.2	20.5	0.6	10.3	47.1	CoilSurveyScan	12:15:22	12:15:30	0.1	SenseRefScan	12:15:34	12:15:43	0.2	SmartBrain	12:15:47	12:16:22	0.6	DWI_tra 3mm	12:16:50	12:19:22	2.5	FLAIR_3D_sag	12:19:26	12:24:40	5.2	SWIp	12:26:05	12:31:01	4.9	T1_FFE_tra	12:31:04	12:34:22	3.3	T2_MV_XD_tra	12:34:25	12:37:02	2.6	PCA_3D_cor_Venc 30	12:39:00	12:45:52	6.9	3D_T1_KM_mDIXON_sag
2017	7	Brain	sense_breast_7m_aci	57.1	16.4	73.6	48.6	8.6	25	12.2	16	85.3	CoilSurveyScan	12:08:12	12:08:20	0.1	SenseRefScan	12:08:24	12:08:34	0.2	SmartBrain	12:08:37	12:09:13	0.6	DWI_tra 3mm	12:09:57	12:12:29	2.5	FLAIR_3D_sag	12:12:32	12:17:46	5.2	3D_DIR_sag	12:17:49	12:24:44	6.9	SWIp	12:26:36	12:30:41	4.1	TOF_3D_tra	12:30:45	12:34:45	4	T2_mDIXON_cor	12:36:05	12:40:10	4.1	T2_DRIVE_tra
2017	10	Brain	nvc_base	23.1	16.5	39.6	21.8	1.3	17.8	2.1	12.8	38	CoilSurveyScan	14:37:55	14:38:03	0.1	SenseRefScan	14:38:08	14:38:18	0.2	SmartBrain	14:38:21	14:38:56	0.6	DWI_tra 3mm	14:39:54	14:42:26	2.5	FLAIR_3D_sag	14:42:30	14:47:44	5.2	3D_T1_NATIV_mDIXON_sag	14:47:47	14:53:21	5.6	SWIp	14:53:23	14:58:20	5	T2_MV_XD_tra	14:58:24	15:01:01	2.6
2017	7	Brain	posterior	27.4	16.5	43.9	25.3	2.1	18.6	8.1	10.8	46.3	CoilSurveyScan	12:34:41	12:34:49	0.1	SenseRefScan	12:34:54	12:35:03	0.2	SmartBrain	12:35:07	12:35:42	0.6	DWI_tra 3mm	12:36:15	12:38:48	2.5	FLAIR_3D_sag	12:38:51	12:44:05	5.2	SWIp	12:44:08	12:49:05	4.9	T1_FFE_tra	12:49:09	12:52:22	3.2	CoilSurveyScan	12:53:29	12:53:33	0.1	SenseRefScan	12:53:38	12:53:47	0.2	T2_MV_XD_tra
2017	10	Brain	sense_knee_16_aci	27.6	16.6	44.2	25.2	2.4	19	9.7	8.4	45.7	CoilSurveyScan	16:07:10	16:07:18	0.1	SenseRefScan	16:07:22	16:07:32	0.2	SmartBrain	16:07:36	16:08:11	0.6	DWI_tra 3mm	16:08:45	16:11:17	2.5	FLAIR_3D_sag	16:11:42	16:16:59	5.3	SWIp	16:17:04	16:22:01	5	T1_FFE_tra	16:22:05	16:25:19	3.2	T2_MV_XD_tra	16:26:22	16:29:00	2.6	3D_T1_KM_mDIXON_sag	16:29:05	16:34:47	5.7
2017	8	Brain	nvc_base	23.2	16.8	40	21.9	1.3	18.1	16.5	16.5	56.2	CoilSurveyScan	12:43:52	12:44:00	0.1	SenseRefScan	12:44:05	12:44:14	0.2	SmartBrain	12:44:18	12:44:53	0.6	DWI_tra 3mm	12:45:54	12:48:26	2.5	FLAIR_3D_sag	12:48:29	12:53:43	5.2	SWIp	12:53:46	12:58:43	4.9	T2W_MV_XD_tra	12:58:46	13:01:24	2.6	3D_T1_mDIXON_sag	13:01:26	13:07:05	5.6
2017	9	Brain	nvc_base	29.3	17.1	46.3	25.3	3.9	21	10.3	11.9	51.5	CoilSurveyScan	16:08:42	16:08:49	0.1	SenseRefScan	16:08:53	16:09:03	0.2	SmartBrain	16:09:06	16:09:42	0.6	DWI_tra 3mm	16:10:12	16:12:44	2.5	SenseRefScan	16:13:02	16:13:12	0.2	FLAIR_3D_sag	16:13:15	16:18:31	5.3	SWIp	16:18:49	16:23:46	4.9	T1_FFE_tra	16:23:49	16:27:03	3.2	T2W_MV_XD_tra	16:29:35	16:32:13	2.6	3D_T1_KM_mDIXON_sag
2017	5	Brain	nvc_base	28.2	17.3	45.5	25	3.2	20.5	0.3	10.9	39.4	CoilSurveyScan	10:34:31	10:34:39	0.1	SenseRefScan	10:34:43	10:34:53	0.2	SmartBrain	10:34:56	10:35:32	0.6	DWI_tra 3mm	10:36:20	10:38:52	2.5	FLAIR_3D_sag	10:38:54	10:44:09	5.2	SWIp	10:44:12	10:49:09	4.9	T1_FFE_tra	10:49:11	10:52:24	3.2	T2_MV_XD_tra	10:54:31	10:57:10	2.6	3D_T1_KM_mDIXON_sag	10:57:12	11:02:45	5.5
2017	6	Brain	anterior	28.9	17.3	46.1	25.2	3.6	20.9	0.2	6.7	35.8	CoilSurveyScan	10:47:22	10:47:30	0.1	SenseRefScan	10:47:34	10:47:44	0.2	SmartBrain	10:47:47	10:48:23	0.6	DWI_tra 3mm	10:49:51	10:52:30	2.6	FLAIR_3D_sag	10:52:32	10:57:47	5.2	SWIp	10:57:49	11:02:47	5	T1_FFE_tra	11:02:50	11:06:05	3.2	T2_MV_XD_tra	11:07:56	11:10:34	2.6	3D_T1_KM_mDIXON_sag	11:10:37	11:16:15	5.6
2017	5	Brain	anterior	33.4	17.4	50.8	31.3	2.1	19.5	1.6	4.4	39.4	CoilSurveyScan	11:49:20	11:49:28	0.1	SenseRefScan	11:49:32	11:49:41	0.2	SmartBrain	11:49:45	11:50:20	0.6	DWI_tra 3mm	11:51:38	11:54:11	2.5	FLAIR_3D_sag	11:54:14	11:59:46	5.5	CoilSurveyScan	11:59:47	11:59:51	0.1	SenseRefScan	11:59:55	12:00:04	0.2	SURVEY_PCA	12:00:08	12:00:20	0.2	SWIp	12:00:25	12:05:22	4.9	3D_T1_NATIV_mDIXON_sag
2017	1	Brain	nvc_base	30	17.7	47.7	26.3	3.7	21.4	8.4	17.2	55.7	CoilSurveyScan	07:43:41	07:44:12	0.5	SenseRefScan	07:44:16	07:44:26	0.2	SmartBrain	07:44:30	07:45:05	0.6	DWI_tra 3mm	07:45:38	07:48:10	2.5	FLAIR_3D_sag	07:48:13	07:48:15	0	CoilSurveyScan	07:49:33	07:49:38	0.1	SenseRefScan	07:49:42	07:49:51	0.2	SmartBrain	07:49:54	07:50:28	0.6	FLAIR_3D_sag	07:50:53	07:56:08	5.2	SWIp
2017	1	Brain	sense_breast_7m_aci	38	17.9	55.9	34	4	21.8	16.6	17.7	72.3	CoilSurveyScan	07:44:48	07:45:19	0.5	SenseRefScan	07:45:23	07:45:33	0.2	SmartBrain	07:45:37	07:46:12	0.6	DWI_tra 3mm	07:46:52	07:49:24	2.5	CoilSurveyScan	07:49:25	07:49:29	0.1	SenseRefScan	07:49:33	07:49:42	0.2	FLAIR_3D_sag	07:49:45	07:54:59	5.2	SWIp	07:55:26	08:00:23	4.9	T1_FFE_tra	08:00:25	08:03:38	3.2	FLAIR_3D_sag
2017	8	Brain	nvc_base	54.8	18.2	73	48.9	5.9	24.1	5.6	7.8	68.3	CoilSurveyScan	13:18:34	13:18:42	0.1	SenseRefScan	13:18:47	13:18:57	0.2	SmartBrain	13:19:00	13:19:35	0.6	DWI_tra 3mm	13:20:19	13:22:58	2.6	SenseRefScan	13:23:05	13:23:15	0.2	FLAIR_3D_sag	13:23:18	13:28:35	5.3	SWIp	13:28:39	13:33:36	5	TOF_3D_tra	13:33:41	13:37:43	4	T1_FFE_tra	13:37:48	13:41:01	3.2	CoilSurveyScan
2017	7	Brain	anterior	33.4	18.3	51.6	32.3	1.1	19.3	0.3	12.2	45.8	CoilSurveyScan	11:33:11	11:33:19	0.1	SenseRefScan	11:33:23	11:33:32	0.2	SmartBrain	11:33:36	11:34:11	0.6	DWI_tra 3mm	11:34:40	11:37:12	2.5	FLAIR_3D_sag	11:37:15	11:42:30	5.2	T1_3D_TFE_sag	11:42:32	11:48:13	5.7	3D_DIR_sag	11:48:27	11:55:21	6.9	SWIp	11:55:24	12:00:20	4.9	T2W_MV_XD_cor	12:00:24	12:03:52	3.5	T2W_MV_XD_tra
2017	11	Brain	sense_small_extr_8_aci	29.6	18.4	48	25.1	4.4	22.8	5.7	18.1	53.3	CoilSurveyScan	16:29:30	16:29:37	0.1	SenseRefScan	16:29:42	16:29:51	0.2	SmartBrain	16:29:55	16:30:30	0.6	DWI_tra 3mm	16:31:11	16:33:45	2.6	FLAIR_3D_sag	16:33:47	16:39:01	5.2	SWIp	16:39:04	16:44:02	5	T1_FFE_tra	16:44:05	16:47:21	3.3	T2W_MV_XD_tra	16:50:47	16:53:25	2.6	3D_T1_KM_mDIXON_sag	16:53:28	16:59:04	5.6
2017	7	Brain	anterior	36	18.6	54.5	32.5	3.5	22.1	3.8	6.7	46.5	CoilSurveyScan	11:54:49	11:54:57	0.1	SenseRefScan	11:55:01	11:55:10	0.2	SmartBrain	11:55:14	11:55:50	0.6	CoilSurveyScan	11:56:59	11:57:04	0.1	DWI_tra 3mm	11:57:08	11:59:42	2.6	FLAIR_3D_sag	12:00:06	12:05:21	5.2	SenseRefScan	12:05:26	12:05:38	0.2	SWIp	12:05:42	12:10:40	5	T1_FFE_tra	12:10:58	12:14:16	3.3	T2_MV_XD_tra
2017	5	Brain	nvc_base	33.6	18.7	52.3	31.2	2.4	21.1	5.2	9.8	48.6	CoilSurveyScan	11:34:49	11:34:57	0.1	SenseRefScan	11:35:01	11:35:11	0.2	SmartBrain	11:35:14	11:35:50	0.6	DWI_tra 3mm	11:36:18	11:38:50	2.5	FLAIR_3D_sag	11:38:53	11:44:07	5.2	SWIp	11:44:29	11:49:26	4.9	Small DWI_Pons_ZOOM_Tra	11:49:29	11:55:20	5.9	T1_FFE_tra	11:55:23	11:58:38	3.2	T2_MV_XD_tra	11:59:47	12:02:26	2.6	CoilSurveyScan
2017	10	Brain	sense_breast_7m_aci	29.1	18.8	48	21.6	7.5	26.3	12	16.7	57.8	CoilSurveyScan	14:41:17	14:41:25	0.1	SenseRefScan	14:41:29	14:41:39	0.2	SmartBrain	14:41:43	14:42:18	0.6	DWI_tra 3mm	14:43:26	14:46:04	2.6	CoilSurveyScan	14:46:05	14:46:09	0.1	SenseRefScan	14:46:14	14:46:23	0.2	FLAIR_3D_sag	14:46:26	14:51:41	5.2	SWIp	14:51:43	14:56:40	4.9	T1_FFE_tra	14:56:43	14:57:36	0.9	CoilSurveyScan
2017	7	Brain	nvc_base	53.9	19	72.9	48.5	5.4	24.4	6.4	16.3	76.6	CoilSurveyScan	12:51:52	12:52:00	0.1	SenseRefScan	12:52:05	12:52:14	0.2	SmartBrain	12:52:18	12:52:53	0.6	DWI_tra 3mm	12:53:48	12:56:20	2.5	FLAIR_3D_sag	12:56:23	13:01:37	5.2	SWIp	13:01:40	13:06:37	5	Small DWI_Pons_ZOOM_Tra	13:06:41	13:13:01	6.3	T1_FFE_tra	13:13:17	13:16:30	3.2	T2_DRIVE_HR_tra	13:16:33	13:22:03	5.5	T2_mDIXON_cor
2017	5	Brain	nvc_base	27.3	19.1	46.4	25.3	2.1	21.1	5.2	18.8	51.3	CoilSurveyScan	11:21:15	11:21:23	0.1	SenseRefScan	11:21:27	11:21:37	0.2	SmartBrain	11:21:40	11:22:15	0.6	DWI_tra 3mm	11:22:43	11:25:15	2.5	FLAIR_3D_sag	11:25:25	11:30:40	5.2	SWIp	11:30:53	11:35:49	4.9	T1_FFE_tra	11:35:52	11:39:10	3.3	T2_MV_XD_tra	11:40:11	11:42:49	2.6	3D_T1_KM_mDIXON_sag	11:42:52	11:48:36	5.7
2017	4	Brain	nvc_base	34	19.1	53.1	30.5	3.5	22.6	5.1	11	50.2	CoilSurveyScan	10:26:43	10:26:51	0.1	SenseRefScan	10:26:56	10:27:05	0.2	SmartBrain	10:27:09	10:27:44	0.6	DWI_tra 3mm	10:28:13	10:30:44	2.5	FLAIR_3D_sag	10:30:47	10:36:02	5.2	SWIp	10:36:05	10:41:02	5	CoilSurveyScan	10:41:28	10:41:32	0.1	SenseRefScan	10:41:37	10:41:46	0.2	FLAIR_3D_sag	10:41:51	10:46:57	5.1	T1_FFE_tra
2017	10	Brain	sense_breast_7m_aci	71	19.5	90.4	60.6	10.4	29.8	0.3	4.9	76.1	CoilSurveyScan	14:17:13	14:17:20	0.1	SenseRefScan	14:17:25	14:17:35	0.2	SmartBrain	14:17:39	14:18:14	0.6	DWI_tra 3mm	14:19:05	14:21:37	2.5	SWIp	14:21:40	14:26:37	4.9	TOF_3D_tra	14:26:39	14:30:39	4	3D_T1_NATIV_BrainVIEW_BB	14:30:47	14:36:08	5.3	T1_FFE_tra	14:36:11	14:39:25	3.2	3D_T1_NATIV_BrainVIEW_BB	14:40:55	14:46:05	5.2	T2_MV_XD_tra
2017	6	Brain	sense_small_extr_8_aci	42.7	19.9	62.6	22.1	20.6	40.5	0.3	5.5	48.4	CoilSurveyScan	12:55:03	12:55:10	0.1	SenseRefScan	12:55:15	12:55:25	0.2	SmartBrain	12:55:28	12:56:04	0.6	CoilSurveyScan	13:00:09	13:00:14	0.1	SenseRefScan	13:00:18	13:00:27	0.2	SmartBrain	13:00:30	13:01:05	0.6	3D_T1_KM_mDIXON_sag	13:03:01	13:08:48	5.8	CoilSurveyScan	13:11:37	13:11:41	0.1	SenseRefScan	13:11:46	13:11:55	0.2	SmartBrain
2017	5	Brain	sense_knee_16_aci	29.5	20.5	50	28.3	1.2	21.7	12.1	20	61.7	CoilSurveyScan	11:26:31	11:26:38	0.1	SenseRefScan	11:26:42	11:26:52	0.2	SmartBrain	11:26:56	11:27:31	0.6	DWI_tra 3mm	11:28:18	11:30:52	2.6	FLAIR_3D_sag	11:30:55	11:36:10	5.2	3D_T1_NATIV_mDIXON_sag	11:36:13	11:41:56	5.7	SWIp	11:41:59	11:46:56	4.9	Small DWI_Pons_ZOOM_Tra	11:46:59	11:53:20	6.3	T2_MV_XD_tra	11:53:22	11:56:00	2.6
2017	7	Brain	nvc_base	31.9	20.5	52.4	25.4	6.5	27	0.3	9	41.2	CoilSurveyScan	13:13:21	13:13:29	0.1	SenseRefScan	13:13:34	13:13:44	0.2	SmartBrain	13:13:47	13:14:22	0.6	DWI_tra 3mm	13:15:20	13:17:52	2.5	FLAIR_3D_sag	13:17:55	13:23:10	5.2	SWIp	13:23:12	13:28:09	4.9	T1_FFE_tra	13:28:12	13:31:27	3.3	T2_MV_XD_tra	13:36:30	13:39:09	2.6	CoilSurveyScan	13:39:14	13:39:18	0.1	SenseRefScan
2017	6	Brain	nvc_base	50.7	20.9	71.7	41.5	9.2	30.1	3	20.4	74.1	CoilSurveyScan	12:35:47	12:35:59	0.2	SenseRefScan	12:36:03	12:36:13	0.2	SmartBrain	12:36:16	12:36:52	0.6	DWI_tra 3mm	12:38:34	12:41:06	2.5	FLAIR_3D_sag	12:41:09	12:46:23	5.2	SWIp	12:46:26	12:51:23	5	TOF_3D_tra	12:51:26	12:55:26	4	T1_FFE_tra	12:55:48	12:59:06	3.3	T2_MV_XD_tra	12:59:10	13:01:47	2.6	CoilSurveyScan
2017	2	Brain	nvc_base	38.6	21.2	59.8	36.6	2	23.2	0.2	15.4	54.2	CoilSurveyScan	09:47:52	09:47:59	0.1	SenseRefScan	09:48:04	09:48:14	0.2	SmartBrain	09:48:18	09:48:53	0.6	DWI_tra 3mm	09:49:29	09:52:01	2.5	FLAIR_3D_sag	09:52:29	09:57:46	5.3	SWIp	09:57:52	10:02:49	5	Small DWI_Hippo_ZOOM_Tra	10:02:56	10:09:16	6.3	SenseRefScan	10:09:34	10:09:44	0.2	T2_MV_sag	10:09:47	10:14:26	4.6	T2W_MV_XD_Hippocampus_cor
2017	6	Brain	sense_knee_16_aci	22.7	21.3	44	21.8	1	22.2	0.3	11.1	34.1	CoilSurveyScan	10:39:10	10:39:17	0.1	SenseRefScan	10:39:22	10:39:31	0.2	SmartBrain	10:39:35	10:40:11	0.6	DWI_tra 3mm	10:40:40	10:43:12	2.5	FLAIR_3D_sag	10:43:14	10:48:29	5.2	SWIp	10:48:40	10:53:36	4.9	T2W_MV_XD_tra	10:53:39	10:56:17	2.6	3D_T1_mDIXON_sag	10:56:20	11:01:53	5.6
2017	10	Brain	nvc_base	27.9	21.3	49.2	25.2	2.7	24	7.8	21	56.8	CoilSurveyScan	16:01:00	16:01:07	0.1	SenseRefScan	16:01:11	16:01:21	0.2	SmartBrain	16:01:25	16:02:00	0.6	DWI_tra 3mm	16:02:28	16:05:01	2.5	FLAIR_3D_sag	16:05:04	16:10:18	5.2	SWIp	16:10:21	16:15:18	4.9	T1_FFE_tra	16:15:35	16:18:51	3.3	T2W_MV_XD_tra	16:20:31	16:23:09	2.6	3D_T1_KM_mDIXON_sag	16:23:12	16:28:55	5.7
2017	9	Brain	sense_breast_7m_aci	25.5	21.4	46.8	22.7	2.8	24.1	3.3	14.6	43.4	CoilSurveyScan	15:19:50	15:19:58	0.1	SenseRefScan	15:20:03	15:20:13	0.2	SmartBrain	15:20:16	15:20:51	0.6	CoilSurveyScan	15:21:22	15:21:26	0.1	SenseRefScan	15:21:30	15:21:43	0.2	TOF_3D_tra	15:21:47	15:25:51	4.1	CoilSurveyScan	15:25:58	15:26:02	0.1	SenseRefScan	15:26:07	15:26:21	0.2	SenseRefScan	15:26:25	15:26:38	0.2	SURVEY
2017	8	Brain	nvc_base	55.1	21.4	76.4	49.6	5.5	26.8	11.8	10.1	76.9	CoilSurveyScan	12:49:21	12:49:29	0.1	SenseRefScan	12:49:34	12:49:44	0.2	SmartBrain	12:49:47	12:50:23	0.6	DWI_tra 3mm	12:51:25	12:53:57	2.5	FLAIR_3D_sag	12:54:00	12:59:15	5.2	TOF_3D_tra	13:00:36	13:04:37	4	T1_TSE_cor	13:05:26	13:10:48	5.4	T2_mDIXON_cor	13:10:53	13:15:20	4.5	T2_DRIVE_tra	13:15:23	13:20:53	5.5	PCA_3D_cor_Venc 30
2017	7	Brain	posterior	49.4	22.2	71.6	46.2	3.2	25.4	11.2	7.6	68.2	CoilSurveyScan	14:04:17	14:04:25	0.1	SenseRefScan	14:04:29	14:04:39	0.2	SmartBrain	14:04:43	14:05:18	0.6	DWI_tra 3mm	14:05:52	14:08:24	2.5	FLAIR_3D_sag	14:08:27	14:13:41	5.2	Small DWI_Pons_ZOOM_Tra	14:15:16	14:21:37	6.4	T1_SE_tra	14:21:40	14:25:54	4.2	T1_TSE_cor	14:25:57	14:30:33	4.6	T2_mDIXON_cor	14:30:36	14:34:41	4.1	T2_HR_mDIXON_TSE
2017	5	Brain	nvc_base	31	22.5	53.5	25.5	5.5	28	0.6	19.6	51.2	CoilSurveyScan	11:33:47	11:33:55	0.1	SenseRefScan	11:33:59	11:34:08	0.2	SmartBrain	11:34:12	11:34:47	0.6	DWI_tra 3mm	11:35:46	11:38:18	2.5	CoilSurveyScan	11:38:26	11:38:31	0.1	SenseRefScan	11:38:36	11:38:46	0.2	FLAIR_3D_sag	11:38:49	11:44:06	5.3	SWIp	11:44:11	11:49:10	5	T1_FFE_tra	11:49:12	11:52:28	3.3	T2W_MV_XD_tra
2017	16	Brain	anterior	33.9	22.7	56.6	31.5	2.5	25.2	0.2	22.4	56.6	CoilSurveyScan	18:25:14	18:25:21	0.1	SenseRefScan	18:25:26	18:25:36	0.2	SmartBrain	18:25:39	18:26:15	0.6	DWI_tra 3mm	18:26:51	18:29:24	2.5	Small DWI_Pons_ZOOM_Tra	18:29:26	18:29:27	0	FLAIR_3D_sag	18:29:44	18:34:59	5.2	SWIp	18:35:03	18:39:59	4.9	Small DWI_Pons_ZOOM_Tra	18:40:18	18:46:40	6.4	T1_FFE_tra	18:46:42	18:49:56	3.2	T2_MV_XD_tra
2017	6	Brain	anterior	35.9	22.7	58.6	32	3.9	26.6	8.9	21.7	66.5	CoilSurveyScan	12:36:07	12:36:15	0.1	SenseRefScan	12:36:19	12:36:29	0.2	SmartBrain	12:36:32	12:37:08	0.6	DWI_tra 3mm	12:38:10	12:40:52	2.7	FLAIR_3D_sag	12:40:54	12:46:09	5.2	SWIp	12:46:30	12:51:27	4.9	T1_FFE_tra	12:51:30	12:54:47	3.3	T2_DRIVE_HR_sag	12:54:50	13:01:30	6.7	T2_MV_XD_tra	13:03:42	13:06:19	2.6	3D_T1_KM_mDIXON_sag
2017	7	Brain	anterior	33.1	22.9	55.9	29	4.1	26.9	4	16.2	53.4	CoilSurveyScan	13:52:48	13:52:55	0.1	SenseRefScan	13:53:00	13:53:09	0.2	SmartBrain	13:53:13	13:53:48	0.6	DWI_tra 3mm	13:54:43	13:57:15	2.5	FLAIR_3D_sag	13:57:18	14:02:32	5.2	SWIp	14:02:35	14:07:32	4.9	T1_FFE_tra	14:07:47	14:11:01	3.2	TOF_3D_tra	14:11:14	14:15:14	4	T2_MV_XD_tra	14:17:39	14:20:17	2.6	3D_T1_KM_mDIXON_sag
2017	9	Brain	nvc_base	55.8	23	78.9	46.9	9	32	1	14.9	71.7	CoilSurveyScan	14:27:08	14:27:15	0.1	SenseRefScan	14:27:19	14:27:29	0.2	SmartBrain	14:27:33	14:28:08	0.6	CoilSurveyScan	14:28:51	14:28:55	0.1	SenseRefScan	14:28:59	14:29:11	0.2	SmartBrain	14:29:16	14:29:53	0.6	SenseRefScan	14:30:54	14:31:03	0.2	DWIBS_b_0_800	14:31:07	14:37:52	6.8	T2_HR_mDIXON_TSE	14:37:57	14:43:01	5.1	T2_HR_mDIXON_TSE
2017	8	Brain	sense_knee_16_aci	71.5	23	94.4	62.6	8.8	31.8	6.6	14.6	92.7	CoilSurveyScan	11:47:26	11:47:33	0.1	SenseRefScan	11:47:37	11:47:47	0.2	SmartBrain	11:47:51	11:48:26	0.6	DWIBS_b_0_800	11:49:56	11:56:42	6.8	T1_TSE_cor	11:56:59	12:01:14	4.2	T1_TSE_tra	12:01:19	12:01:25	0.1	T1_TSE_tra	12:01:53	12:06:03	4.2	CoilSurveyScan	12:09:12	12:09:17	0.1	SenseRefScan	12:09:21	12:09:30	0.2	T1_TSE_tra
2017	7	Brain	sense_breast_7m_aci	36.5	23.1	59.6	29.9	6.6	29.7	3.2	10.3	49.9	CoilSurveyScan	13:56:25	13:56:33	0.1	SenseRefScan	13:56:37	13:56:47	0.2	SmartBrain	13:56:50	13:57:26	0.6	DWI_tra 3mm	13:58:42	14:01:14	2.5	FLAIR_3D_sag	14:01:40	14:06:57	5.3	SWIp	14:07:02	14:11:59	5	TOF_3D_tra	14:14:35	14:18:38	4	T1_FFE_tra	14:18:43	14:22:26	3.7	T2_MV_XD_tra	14:22:37	14:22:41	0.1	T2_MV_XD_tra
2017	6	Brain	anterior	53.2	23.2	76.3	45.3	7.8	31	0.2	12.7	66	CoilSurveyScan	12:40:16	12:40:23	0.1	SenseRefScan	12:40:28	12:40:38	0.2	SmartBrain	12:40:41	12:41:17	0.6	DWI_tra 3mm	12:42:46	12:45:18	2.5	FLAIR_3D_sag	12:45:21	12:50:35	5.2	TOF_3D_tra	12:50:38	12:54:38	4	SWIp	12:54:41	12:59:37	4.9	T1_FFE_tra	12:59:40	13:02:56	3.3	T2_MV_XD_tra	13:02:59	13:05:37	2.6	CoilSurveyScan
2017	6	Brain	anterior	43	24.5	67.6	38.7	4.3	28.9	0.3	22.9	66.3	CoilSurveyScan	11:21:01	11:21:08	0.1	SenseRefScan	11:21:13	11:21:22	0.2	SmartBrain	11:21:25	11:22:01	0.6	CoilSurveyScan	11:23:10	11:23:15	0.1	DWI_tra 3mm	11:23:20	11:25:54	2.6	FLAIR_3D_sag	11:26:22	11:31:37	5.2	3D_T1_NATIV_mDIXON_sag	11:32:01	11:37:37	5.6	T2_MV_XD_tra	11:37:42	11:40:20	2.6	SenseRefScan	11:41:40	11:41:52	0.2	SWIp
2017	12	Brain	nvc_base	42.4	24.8	67.2	9.8	32.5	57.3	0.5	20.4	63.3	CoilSurveyScan	18:05:40	18:05:44	0.1	SenseRefScan	18:05:49	18:05:58	0.2	T2W_TSE	18:06:01	18:06:37	0.6	T2W_TSE	18:13:28	18:14:03	0.6	T2W_TSE	18:19:14	18:19:44	0.5	T2W_TSE	18:24:16	18:24:44	0.5	FE_EPI	18:39:45	18:40:02	0.3	FE_EPI	18:40:21	18:40:38	0.3	FE_EPI	18:40:55	18:41:01	0.1	CoilSurveyScan
2017	3	Brain	sense_breast_7m_aci	22.3	25.4	47.7	18.5	3.8	29.2	7.7	13.4	43.4	CoilSurveyScan	08:59:04	08:59:12	0.1	SenseRefScan	08:59:18	08:59:46	0.5	SURVEY	08:59:49	09:00:28	0.6	CoilSurveyScan	09:01:18	09:01:22	0.1	SenseRefScan	09:01:26	09:01:50	0.4	CoilSurveyScan	09:01:57	09:02:01	0.1	SenseRefScan	09:02:05	09:02:30	0.4	T2_SSH_BH_tra	09:02:33	09:06:17	3.7	CoilSurveyScan	09:06:21	09:06:25	0.1	SenseRefScan
2017	8	Brain	sense_breast_7m_aci	23.9	26.2	50	22.2	1.7	27.9	0.1	14.7	38.7	CoilSurveyScan	16:02:18	16:02:26	0.1	SenseRefScan	16:02:31	16:02:40	0.2	SmartBrain	16:02:44	16:03:19	0.6	DWI_tra 3mm	16:04:12	16:06:44	2.5	CoilSurveyScan	16:07:00	16:07:04	0.1	SenseRefScan	16:07:08	16:07:17	0.2	FLAIR_3D_sag	16:07:21	16:12:35	5.2	SWIp	16:12:37	16:17:34	4.9	3D_T1_NATIV_mDIXON_sag	16:17:46	16:23:30	5.7	T2W_MV_XD_tra
2017	11	Brain	nvc_base	32.4	27.3	59.7	29.4	2.9	30.3	9.8	25.2	67.4	CoilSurveyScan	17:22:05	17:22:12	0.1	SenseRefScan	17:22:17	17:22:27	0.2	SmartBrain	17:22:30	17:23:05	0.6	DWI_tra 3mm	17:23:31	17:26:03	2.5	SenseRefScan	17:26:24	17:26:35	0.2	FLAIR_3D_sag	17:26:37	17:31:54	5.3	TOF_3D_tra	17:31:57	17:35:59	4	SWIp	17:36:03	17:41:01	5	T1_FFE_tra	17:41:04	17:44:19	3.2	T2_MV_XD_tra
2017	10	Brain	nvc_base	44.3	27.7	72	41.6	2.7	30.4	9.7	23.8	77.8	CoilSurveyScan	16:36:45	16:36:53	0.1	SenseRefScan	16:36:57	16:37:06	0.2	SmartBrain	16:37:10	16:37:45	0.6	DWI_tra 3mm	16:38:24	16:40:56	2.5	FLAIR_3D_sag	16:40:58	16:46:12	5.2	3D_DIR_sag	16:46:16	16:53:10	6.9	SWIp	16:53:13	16:57:18	4.1	T2_mDIXON_cor	16:57:44	17:01:49	4.1	T2_DRIVE_tra	17:01:51	17:07:22	5.5	T2_MV_XD_tra
2017	7	Brain	nvc_base	28	28.2	56.2	25	3.1	31.2	0.3	27.4	55.7	CoilSurveyScan	11:32:42	11:32:50	0.1	SenseRefScan	11:32:54	11:33:04	0.2	SmartBrain	11:33:07	11:33:43	0.6	DWI_tra 3mm	11:34:13	11:36:45	2.5	FLAIR_3D_sag	11:36:47	11:42:02	5.2	SWIp	11:42:05	11:47:02	4.9	T1_FFE_tra	11:47:05	11:50:18	3.2	T2_MV_XD_tra	11:52:32	11:55:10	2.6	3D_T1_KM_mDIXON_sag	11:55:13	12:00:45	5.5
2017	7	Brain	anterior	32.2	28.3	60.5	27.3	4.9	33.2	35.2	18.9	86.4	CoilSurveyScan	12:04:30	12:04:37	0.1	SenseRefScan	12:04:42	12:04:52	0.2	SmartBrain	12:04:55	12:05:30	0.6	DWI_tra 3mm	12:06:53	12:09:28	2.6	FLAIR_3D_sag	12:09:30	12:14:44	5.2	SWIp	12:14:47	12:19:45	5	T1_FFE_tra	12:19:48	12:23:25	3.6	CoilSurveyScan	12:26:33	12:26:38	0.1	SenseRefScan	12:26:42	12:26:52	0.2	T2_MV_XD_tra
2017	9	Brain	nvc_base	27.7	28.6	56.3	26.3	1.5	30.1	4.9	20.7	53.3	CoilSurveyScan	17:58:41	17:58:49	0.1	SenseRefScan	17:58:53	17:59:03	0.2	SmartBrain	17:59:06	17:59:42	0.6	DWI_tra 3mm	18:00:17	18:02:59	2.7	3D_Brain_VIEW_T2	18:03:02	18:07:28	4.4	3D_T1_NATIV_mDIXON_sag	18:07:46	18:13:22	5.6	FLAIR_3D_sag	18:13:25	18:18:29	5.1	SWIp	18:18:48	18:23:45	4.9	T2_MV_XD_tra	18:23:47	18:26:25	2.6
2017	12	Brain	nvc_base	22.5	29.3	51.8	21.8	0.6	29.9	3.5	16.6	42.6	CoilSurveyScan	17:57:01	17:57:09	0.1	SenseRefScan	17:57:12	17:57:22	0.2	SmartBrain	17:57:26	17:58:01	0.6	DWI_tra 3mm	17:58:21	18:00:54	2.5	FLAIR_3D_sag	18:00:56	18:06:11	5.2	SWIp	18:06:14	18:11:10	4.9	3D_T1_NATIV_mDIXON_sag	18:11:13	18:16:50	5.6	T2W_MV_XD_tra	18:16:52	18:19:30	2.6
2017	4	Brain	nvc_base	23.5	29.9	53.4	21.9	1.7	31.5	0.4	20.8	44.7	CoilSurveyScan	10:43:49	10:43:57	0.1	SenseRefScan	10:44:02	10:44:12	0.2	SmartBrain	10:44:15	10:44:50	0.6	DWI_tra 3mm	10:45:47	10:48:19	2.5	FLAIR_3D_sag	10:48:22	10:53:36	5.2	SWIp	10:53:39	10:58:36	5	3D_T1_NATIV_mDIXON_sag	10:58:38	11:04:14	5.6	T2W_MV_XD_tra	11:04:41	11:07:19	2.6
2017	4	Brain	anterior	35.6	30.3	65.9	31.6	3.9	34.2	11.9	29.8	77.3	CoilSurveyScan	09:46:44	09:46:51	0.1	SenseRefScan	09:46:56	09:47:05	0.2	SmartBrain	09:47:09	09:47:44	0.6	DWI_tra 3mm	09:48:43	09:51:15	2.5	SenseRefScan	09:51:36	09:51:46	0.2	FLAIR_3D_sag	09:51:49	09:57:05	5.3	T2_MV_sag	09:57:08	10:01:47	4.6	T1_FFE_tra	10:01:52	10:05:06	3.2	SWIp	10:05:09	10:09:16	4.1	CoilSurveyScan
2017	3	Brain	sense_breast_7m_aci	46.1	30.4	76.5	43.3	2.8	33.2	1	30	77.1	CoilSurveyScan	09:27:19	09:27:27	0.1	SenseRefScan	09:27:31	09:27:40	0.2	SmartBrain	09:27:44	09:28:19	0.6	DWI_tra 3mm	09:28:41	09:31:13	2.5	FLAIR_3D_sag	09:31:16	09:36:30	5.2	SWIp	09:36:34	09:41:30	4.9	T1_FFE_tra	09:41:33	09:44:54	3.3	3D_T1_NATIV_BrainVIEW_BB	09:45:08	09:50:28	5.3	TOF_3D_tra	09:50:32	09:54:32	4	T2_DRIVE_HR_tra
2017	9	Brain	anterior	28.2	30.8	59	25.6	2.6	33.5	1.4	30.2	59.7	CoilSurveyScan	13:42:38	13:42:45	0.1	SenseRefScan	13:42:50	13:42:59	0.2	SmartBrain	13:43:03	13:43:38	0.6	DWI_tra 3mm	13:44:23	13:47:04	2.7	FLAIR_3D_sag	13:47:21	13:52:38	5.3	3D_T1_NATIV_mDIXON_sag	13:52:41	13:58:34	5.9	SWIp	13:58:39	14:01:33	2.9	CoilSurveyScan	14:02:30	14:02:34	0.1	SenseRefScan	14:02:38	14:02:47	0.2	SWIp
2017	10	Brain	nvc_base	33.6	32.9	66.5	29.3	4.3	37.2	0.2	23	56.8	CoilSurveyScan	16:15:32	16:15:40	0.1	SenseRefScan	16:15:44	16:15:53	0.2	SmartBrain	16:15:57	16:16:32	0.6	DWI_tra 3mm	16:17:54	16:20:36	2.7	FLAIR_3D_sag	16:20:38	16:25:52	5.2	SWIp	16:25:55	16:30:52	4.9	TOF_3D_tra	16:31:41	16:35:41	4	T1_FFE_tra	16:35:44	16:38:58	3.2	T2_MV_XD_tra	16:40:49	16:43:28	2.6	3D_T1_KM_mDIXON_sag
2017	4	Brain	sense_breast_7m_aci	30.9	33.8	64.7	25.3	5.6	39.4	10.3	15.9	57	CoilSurveyScan	10:31:12	10:31:19	0.1	SenseRefScan	10:31:24	10:31:34	0.2	SmartBrain	10:31:37	10:32:13	0.6	DWI_tra 3mm	10:33:08	10:35:40	2.5	FLAIR_3D_sag	10:35:42	10:40:57	5.2	SWIp	10:41:00	10:45:57	5	T1_FFE_tra	10:46:00	10:49:18	3.3	T2W_MV_XD_tra	10:53:38	10:56:16	2.6	3D_T1_KM_mDIXON_sag	10:56:19	11:02:05	5.8
2017	7	Brain	posterior	23.9	34.3	58.2	22.1	1.7	36.1	0.2	26.3	50.3	CoilSurveyScan	12:07:15	12:07:22	0.1	SenseRefScan	12:07:27	12:07:37	0.2	SmartBrain	12:07:40	12:08:16	0.6	DWI_tra 3mm	12:08:38	12:11:10	2.5	FLAIR_3D_sag	12:11:12	12:16:27	5.2	TOF_3D_tra	12:16:30	12:20:30	4	SWIp	12:20:33	12:25:30	4.9	CoilSurveyScan	12:25:58	12:26:02	0.1	SenseRefScan	12:26:08	12:26:20	0.2	SURVEY_PCA
2017	7	Brain	anterior	26.7	34.4	61.1	25	1.7	36.1	0.2	25.8	52.8	CoilSurveyScan	13:04:22	13:04:30	0.1	SenseRefScan	13:04:34	13:04:44	0.2	SmartBrain	13:04:47	13:05:23	0.6	DWI_tra 3mm	13:05:57	13:08:29	2.5	FLAIR_3D_sag	13:08:32	13:13:47	5.2	SWIp	13:13:49	13:18:46	4.9	T1_FFE_tra	13:18:50	13:22:03	3.2	T2_MV_XD_tra	13:22:50	13:25:28	2.6	3D_T1_KM_mDIXON_sag	13:25:31	13:31:05	5.6
2017	6	Brain	sense_breast_7m_aci	37.3	35.8	73.1	36	1.3	37.1	0.8	8.9	46.9	CoilSurveyScan	12:35:13	12:35:21	0.1	SenseRefScan	12:35:25	12:35:35	0.2	SmartBrain	12:35:38	12:36:14	0.6	DWI_tra 3mm	12:36:47	12:39:19	2.5	FLAIR_3D_sag	12:39:22	12:44:37	5.2	Small DWI_Hippo_ZOOM_Tra	12:44:41	12:50:33	5.9	SWIp	12:50:50	12:55:46	4.9	T2_MV_sag	12:55:49	13:00:38	4.8	3D_Nativ_T1_mDIXON_sag	13:00:41	13:06:18	5.6	T2W_MV_XD_Hippocampus_cor
2017	6	Brain	posterior	12.2	36	48.3	11.2	1.1	37.1	1.6	27.5	41.4	CoilSurveyScan	13:34:18	13:34:25	0.1	SenseRefScan	13:34:30	13:34:40	0.2	SmartBrain	13:34:43	13:35:18	0.6	DWI_tra 3mm	13:36:10	13:38:42	2.5	FLAIR_3D_sag	13:38:45	13:43:59	5.2	SWIp	13:44:02	13:46:32	2.5
2017	11	Brain	nvc_base	28.6	37	65.7	27.3	1.3	38.3	8.2	33.5	70.3	CoilSurveyScan	16:51:22	16:51:29	0.1	SenseRefScan	16:51:34	16:51:44	0.2	SmartBrain	16:51:47	16:52:23	0.6	DWI_tra 3mm	16:52:51	16:55:24	2.5	FLAIR_3D_sag	16:55:26	17:00:41	5.2	SWIp	17:00:44	17:05:47	5.1	3D_T1_NATIV_mDIXON_sag	17:05:50	17:11:29	5.6	CoilSurveyScan	17:11:53	17:11:57	0.1	SenseRefScan	17:12:01	17:12:11	0.2	T2W_MV_XD_tra
2017	6	Brain	anterior	32.3	38.7	71.1	29.5	2.8	41.6	0.2	5.8	38.4	CoilSurveyScan	12:31:20	12:31:28	0.1	SenseRefScan	12:31:33	12:31:42	0.2	SmartBrain	12:31:45	12:32:20	0.6	DWI_tra 3mm	12:32:51	12:35:23	2.5	FLAIR_3D_sag	12:35:26	12:40:40	5.2	Small DWI_Pons_ZOOM_Tra	12:40:43	12:45:07	4.4	SWIp	12:45:14	12:50:10	4.9	T1_FFE_tra	12:50:13	12:53:29	3.3	T2_MV_XD_tra	12:55:21	12:57:59	2.6	3D_T1_KM_mDIXON_sag
2017	6	Brain	nvc_base	60.2	38.9	99.1	55	5.2	44.1	4.1	31	95.3	CoilSurveyScan	12:17:56	12:18:04	0.1	SenseRefScan	12:18:08	12:18:18	0.2	SmartBrain	12:18:22	12:18:57	0.6	DWI_tra 3mm	12:20:02	12:22:34	2.5	FLAIR_3D_sag	12:22:37	12:27:51	5.2	T1_3D_TFE_sag	12:27:55	12:33:35	5.7	3D_DIR_sag	12:33:38	12:40:32	6.9	SURVEY_PCA_pCASL	12:40:36	12:40:48	0.2	SWIp	12:41:15	12:46:12	4.9	3D_pCASL
2017	13	Brain	posterior	32.1	41	73.1	26.9	5.3	46.2	0.2	34.3	66.6	CoilSurveyScan	17:07:09	17:07:17	0.1	SenseRefScan	17:07:22	17:07:41	0.3	CoilSurveyScan	17:08:41	17:08:47	0.1	SenseRefScan	17:08:52	17:09:01	0.2	SmartBrain	17:09:05	17:09:40	0.6	DWI_tra 3mm	17:10:10	17:12:42	2.5	FLAIR_3D_sag	17:12:45	17:14:17	1.5	FLAIR_3D_sag	17:14:25	17:19:29	5.1	SWIp	17:19:31	17:24:28	4.9	T1_FFE_tra
2017	8	Brain	anterior	23.6	41.9	65.5	22.2	1.4	43.4	6.9	12.1	42.6	CoilSurveyScan	12:41:40	12:41:48	0.1	SenseRefScan	12:41:53	12:42:03	0.2	SmartBrain	12:42:06	12:42:42	0.6	DWI_tra 3mm	12:43:35	12:46:19	2.7	FLAIR_3D_sag	12:46:22	12:51:36	5.2	3D_T1_NATIV_mDIXON_sag	12:51:50	12:57:34	5.7	SWIp	12:57:37	13:02:34	4.9	T2_MV_XD_tra	13:02:37	13:05:15	2.6
2017	4	Brain	nvc_base	29.2	43.4	72.6	25.8	3.4	46.7	0.7	43.1	73	CoilSurveyScan	09:47:23	09:47:30	0.1	SenseRefScan	09:47:36	09:47:45	0.2	SmartBrain	09:47:48	09:48:24	0.6	DWI_tra 3mm	09:49:32	09:52:03	2.5	FLAIR_3D_sag	09:52:21	09:57:36	5.2	SWIp	09:57:38	10:02:35	5	3D_T1_NATIV_mDIXON_sag	10:04:17	10:09:52	5.6	TOF_3D_tra	10:09:54	10:13:55	4	T2W_MV_XD_tra	10:13:58	10:16:35	2.6
2017	9	Brain	nvc_base	31	43.7	74.7	25.1	5.9	49.6	3.5	43.5	78	CoilSurveyScan	15:00:50	15:00:58	0.1	SenseRefScan	15:01:02	15:01:12	0.2	SmartBrain	15:01:16	15:01:51	0.6	DWI_tra 3mm	15:03:16	15:05:48	2.5	FLAIR_3D_sag	15:05:51	15:11:05	5.2	SWIp	15:11:08	15:16:05	4.9	T1_FFE_tra	15:16:08	15:19:22	3.2	T2W_MV_XD_tra	15:23:33	15:26:11	2.6	3D_T1_KM_mDIXON_sag	15:26:14	15:31:50	5.6
2017	6	Brain	anterior	55.3	45.9	101.2	52.3	3	48.9	3.2	18.5	77	CoilSurveyScan	12:33:07	12:33:14	0.1	SenseRefScan	12:33:19	12:33:28	0.2	SmartBrain	12:33:32	12:34:07	0.6	DWI_tra 3mm	12:34:43	12:37:15	2.5	FLAIR_3D_sag	12:37:18	12:42:32	5.2	Small DWI_Pons_ZOOM_Tra	12:42:35	12:48:56	6.3	TOF_3D_tra	12:48:58	12:52:58	4	SWIp	12:53:30	12:58:27	4.9	T1_TSE_cor	12:58:29	13:03:35	5.1	T2_mDIXON_cor
2017	8	Brain	anterior	29.4	49	78.4	25.1	4.3	53.3	0.4	38.6	68.4	CoilSurveyScan	14:50:19	14:50:26	0.1	SenseRefScan	14:50:32	14:50:41	0.2	SmartBrain	14:50:44	14:51:20	0.6	DWI_tra 3mm	14:52:04	14:54:37	2.5	FLAIR_3D_sag	14:54:40	14:59:54	5.2	SWIp	14:59:57	15:04:54	5	T1_FFE_tra	15:04:57	15:08:11	3.2	T2W_MV_XD_tra	15:11:26	15:14:04	2.6	3D_T1_KM_mDIXON_sag	15:14:07	15:19:42	5.6
2017	6	Brain	sense_breast_7m_aci	20.4	50.3	70.7	17.3	3.2	53.5	12	46.9	79.4	CoilSurveyScan	11:11:29	11:11:37	0.1	SenseRefScan	11:11:42	11:12:06	0.4	SURVEY	11:12:09	11:12:45	0.6	CoilSurveyScan	11:13:53	11:13:57	0.1	SenseRefScan	11:14:01	11:14:25	0.4	CoilSurveyScan	11:14:32	11:14:36	0.1	SenseRefScan	11:14:41	11:15:06	0.4	T2_SSH_BH_tra	11:15:09	11:18:49	3.7	CoilSurveyScan	11:19:08	11:19:12	0.1	SenseRefScan
2017	7	Brain	anterior	28.5	50.5	79	25.8	2.7	53.2	0.3	33.9	62.7	CoilSurveyScan	11:24:55	11:25:02	0.1	SenseRefScan	11:25:08	11:25:17	0.2	SmartBrain	11:25:21	11:25:56	0.6	DWI_tra 3mm	11:27:02	11:29:46	2.7	FLAIR_3D_sag	11:29:49	11:35:03	5.2	3D_T1_NATIV_mDIXON_sag	11:35:06	11:35:46	0.7	3D_T1_NATIV_mDIXON_sag	11:35:55	11:41:39	5.7	T2_MV_XD_tra	11:41:42	11:44:20	2.6	SWIp	11:44:25	11:47:20	2.9	SWIp
2017	9	Brain	nvc_base	29.5	51	80.5	25.1	4.3	55.4	0.3	40.5	70.2	CoilSurveyScan	17:05:39	17:05:47	0.1	SenseRefScan	17:05:51	17:06:01	0.2	SmartBrain	17:06:04	17:06:40	0.6	DWI_tra 3mm	17:07:26	17:09:58	2.5	FLAIR_3D_sag	17:10:01	17:15:15	5.2	SWIp	17:15:44	17:20:41	4.9	T1_FFE_tra	17:20:44	17:24:00	3.3	T2W_MV_XD_tra	17:26:50	17:29:28	2.6	3D_T1_KM_mDIXON_sag	17:29:31	17:35:08	5.6
2017	3	Brain	nvc_base	28.6	51.4	80	25.3	3.3	54.7	5.7	16.6	50.9	CoilSurveyScan	10:47:40	10:47:48	0.1	SenseRefScan	10:47:53	10:48:02	0.2	SmartBrain	10:48:06	10:48:41	0.6	DWI_tra 3mm	10:49:02	10:51:33	2.5	FLAIR_3D_sag	10:51:36	10:56:50	5.2	SWIp	10:57:05	11:02:01	4.9	T1_FFE_tra	11:02:04	11:05:18	3.2	CoilSurveyScan	11:07:35	11:07:39	0.1	SenseRefScan	11:07:44	11:07:53	0.2	T2W_MV_XD_tra
2017	6	Brain	nvc_base	33.9	55.8	89.7	31.1	2.8	58.7	0.3	38.6	72.9	CoilSurveyScan	12:34:43	12:34:51	0.1	SenseRefScan	12:34:55	12:35:05	0.2	SmartBrain	12:35:09	12:35:44	0.6	DWI_tra 3mm	12:36:33	12:39:06	2.5	FLAIR_3D_sag	12:39:08	12:44:22	5.2	SWIp	12:44:39	12:49:35	4.9	Small DWI_Pons_ZOOM_Tra	12:49:48	12:55:43	5.9	T1_FFE_tra	12:55:48	12:59:05	3.3	T2_MV_XD_tra	13:00:18	13:02:56	2.6	3D_T1_KM_mDIXON_sag
2017	3	Brain	sense_ankle_8_aci	42.6	56.8	99.4	38.5	4.1	60.9	0.4	15.5	58.6	CoilSurveyScan	09:21:22	09:21:30	0.1	SenseRefScan	09:21:35	09:21:45	0.2	SmartBrain	09:21:48	09:22:24	0.6	DWI_tra 3mm	09:24:04	09:26:37	2.5	CoilSurveyScan	09:26:45	09:26:49	0.1	SenseRefScan	09:26:55	09:27:04	0.2	FLAIR_3D_sag	09:27:08	09:32:24	5.3	T1_3D_TFE_sag	09:32:27	09:38:10	5.7	3D_DIR_sag	09:38:23	09:45:18	6.9	SWIp
2017	9	Brain	sense_breast_7m_aci	31.6	57.6	89.3	29.1	2.5	60.2	2.5	52.2	86.3	CoilSurveyScan	15:19:24	15:19:31	0.1	SenseRefScan	15:19:35	15:19:45	0.2	SmartBrain	15:19:49	15:20:24	0.6	DWI_tra 3mm	15:21:08	15:23:40	2.5	FLAIR_3D_sag	15:23:43	15:28:57	5.2	SWIp	15:29:00	15:33:57	4.9	TOF_3D_tra	15:34:15	15:38:16	4	T1_FFE_tra	15:38:19	15:41:33	3.2	T2_MV_XD_tra	15:42:44	15:45:22	2.6	3D_T1_KM_mDIXON_sag
2017	10	Brain	sense_small_extr_8_aci	27.1	59.5	86.6	25.2	1.9	61.4	6.2	54.7	88	CoilSurveyScan	16:32:00	16:32:08	0.1	SenseRefScan	16:32:13	16:32:23	0.2	SmartBrain	16:32:26	16:33:02	0.6	DWI_tra 3mm	16:33:27	16:35:58	2.5	FLAIR_3D_sag	16:36:01	16:41:16	5.2	SWIp	16:41:19	16:46:15	4.9	T1_FFE_tra	16:46:18	16:49:34	3.3	T2_MV_XD_tra	16:50:45	16:53:24	2.6	3D_T1_KM_mDIXON_sag	16:53:26	16:59:07	5.7
2017	12	Brain	nvc_base	23.9	59.9	83.8	22.5	1.4	61.3	0.2	8.1	32.2	CoilSurveyScan	17:35:58	17:36:06	0.1	SenseRefScan	17:36:10	17:36:20	0.2	SmartBrain	17:36:23	17:36:59	0.6	DWI_tra 3mm	17:37:40	17:40:21	2.7	FLAIR_3D_sag	17:40:24	17:45:38	5.2	CoilSurveyScan	17:45:56	17:46:01	0.1	SenseRefScan	17:46:05	17:46:14	0.2	3D_T1_NATIV_mDIXON_sag	17:46:18	17:51:59	5.7	SWIp	17:52:02	17:56:59	5	T2_MV_XD_tra
2017	8	Brain	anterior	28.6	60.5	89.1	25.2	3.4	63.9	0.4	59.7	88.7	CoilSurveyScan	12:34:08	12:34:16	0.1	SenseRefScan	12:34:21	12:34:31	0.2	SmartBrain	12:34:34	12:35:09	0.6	DWI_tra 3mm	12:36:12	12:38:51	2.6	FLAIR_3D_sag	12:38:54	12:44:08	5.2	SWIp	12:44:11	12:49:08	4.9	T1_FFE_tra	12:49:11	12:52:25	3.2	T2_MV_XD_tra	12:54:25	12:57:03	2.6	3D_T1_KM_mDIXON_sag	12:57:05	13:02:42	5.6
2017	9	Brain	nvc_base	36.6	67.7	104.3	31.3	5.4	73.1	0.1	32.8	69.5	CoilSurveyScan	14:17:34	14:17:42	0.1	SenseRefScan	14:17:46	14:17:57	0.2	SmartBrain	14:18:00	14:18:35	0.6	DWI_tra 3mm	14:19:13	14:21:51	2.6	FLAIR_3D_sag	14:21:53	14:27:08	5.2	SWIp	14:27:11	14:32:22	5.2	T1_FFE_tra	14:32:25	14:36:06	3.7	T2_MV_XD_tra	14:37:46	14:41:40	3.9	CoilSurveyScan	14:44:20	14:44:25	0.1	SenseRefScan
2017	5	Brain	nvc_base	52.4	68.4	120.9	46.6	5.8	74.2	0.4	65.7	118.6	CoilSurveyScan	10:52:35	10:52:43	0.1	SenseRefScan	10:52:48	10:52:58	0.2	SmartBrain	10:53:01	10:53:36	0.6	DWI_tra 3mm	10:54:02	10:56:34	2.5	FLAIR_3D_sag	10:56:37	11:01:52	5.2	Small DWI_Pons_ZOOM_Tra	11:01:54	11:08:15	6.3	SWIp	11:08:18	11:13:14	4.9	TOF_3D_tra	11:14:07	11:18:07	4	T1_FFE_tra	11:18:10	11:21:25	3.2	T2_MV_XD_tra
2017	5	Brain	nvc_base	26.7	69.2	95.8	22.1	4.6	73.7	0.3	66.1	93.1	CoilSurveyScan	10:59:57	11:00:04	0.1	SenseRefScan	11:00:09	11:00:19	0.2	SmartBrain	11:00:22	11:00:58	0.6	DWI_tra 3mm	11:03:10	11:05:51	2.7	SenseRefScan	11:05:53	11:06:03	0.2	FLAIR_3D_sag	11:06:07	11:06:16	0.2	CoilSurveyScan	11:07:55	11:08:00	0.1	SenseRefScan	11:08:04	11:08:13	0.2	FLAIR_3D_sag	11:08:16	11:16:55	8.7	T2_MV_XD_tra
2017	11	Brain	nvc_base	59.2	107.5	166.7	53.4	5.8	113.3	6.5	16.5	82.1	CoilSurveyScan	15:46:01	15:46:09	0.1	SenseRefScan	15:46:13	15:46:23	0.2	SmartBrain	15:46:27	15:47:02	0.6	DWI_tra 3mm	15:47:49	15:50:21	2.5	FLAIR_3D_sag	15:50:24	15:55:38	5.2	SWIp	15:55:41	16:00:38	5	T1_FFE_tra	16:00:41	16:03:54	3.2	TOF_3D_tra	16:04:06	16:08:06	4	T2_MV_XD_tra	16:08:08	16:10:46	2.6	T1_SE_tra
2017	10	Brain	sense_small_extr_8_aci	37.3	112.3	149.5	34.2	3.1	115.3	1	111.9	150.1	CoilSurveyScan	15:30:25	15:30:32	0.1	SenseRefScan	15:30:37	15:30:46	0.2	SmartBrain	15:30:50	15:31:25	0.6	DWI_tra 3mm	15:32:04	15:34:36	2.5	FLAIR_3D_sag	15:34:39	15:39:53	5.2	SWIp	15:39:56	15:44:53	4.9	TOF_3D_tra	15:44:55	15:48:56	4	T1_FFE_tra	15:49:21	15:52:35	3.2	T2_MV_XD_tra	15:53:57	15:56:35	2.6	3D_T1_KM_BrainVIEW_BB_MSDE
2017	3	Brain	sense_ankle_8_aci	23.4	125.1	148.5	21.8	1.5	126.6	7.6	97.5	128.5	CoilSurveyScan	09:15:11	09:15:19	0.1	SenseRefScan	09:15:23	09:15:33	0.2	SmartBrain	09:15:37	09:16:12	0.6	DWI_tra 3mm	09:17:02	09:19:34	2.5	FLAIR_3D_sag	09:19:37	09:24:52	5.2	3D_T1_NATIV_mDIXON_sag	09:25:18	09:30:53	5.6	SWIp	09:30:56	09:35:53	5	T2_MV_XD_tra	09:35:56	09:38:34	2.6
2017	8	Breast	nvc_base	24.7	0	24.7	22.8	1.9	1.9	0.3	206.2	231.2	CoilSurveyScan	15:30:14	15:30:22	0.1	SenseRefScan	15:30:27	15:30:36	0.1	SmartBreast	15:30:38	15:31:28	0.8	STIR_TSE_tra	15:32:15	15:36:00	3.8	T2_TSE_cor	15:36:03	15:39:53	3.8	dyn_T1_2D_FFE	15:40:24	15:47:10	6.8	T1_KM_THRIVE_HR_tra	15:47:22	15:50:34	3.2	T2_MVXD_Axilla	15:50:48	15:54:55	4.1
2017	5	Breast	anterior	37.7	5	42.7	33.3	4.4	9.4	9.3	1.1	48	CoilSurveyScan	11:00:29	11:00:38	0.1	SenseRefScan	11:00:42	11:00:51	0.1	SmartBreast	11:00:53	11:01:43	0.8	STIR_TSE_tra	11:02:48	11:06:33	3.8	T2_TSE_cor	11:06:57	11:11:14	4.3	Silicone_Only Achieva	11:11:36	11:16:57	5.3	Silicone_SUP Achieva	11:17:00	11:20:18	3.3	dyn_T1_2D_FFE_RL	11:21:51	11:29:50	8	T1_KM_THRIVE_HR_tra	11:29:53	11:33:19	3.4	T2_MVXD_Axilla
2017	7	Breast	anterior	26.9	5.6	32.4	23.1	3.8	9.3	5.6	1.8	34.3	CoilSurveyScan	15:32:04	15:32:12	0.1	SenseRefScan	15:32:16	15:32:25	0.1	SmartBreast	15:32:27	15:33:17	0.8	STIR_TSE_tra	15:34:08	15:37:53	3.8	T2_TSE_cor	15:37:56	15:41:45	3.8	dyn_T1_2D_FFE	15:42:01	15:48:57	6.9	T1_KM_THRIVE_HR_tra	15:48:59	15:52:08	3.1	CoilSurveyScan	15:54:29	15:54:34	0.1	SenseRefScan	15:54:39	15:54:48	0.1	T2_MVXD_Axilla
2017	3	Breast	sense_breast_7m_aci	25.2	5.7	30.9	22.9	2.3	8	7.5	0.4	33.1	CoilSurveyScan	08:58:05	08:58:13	0.1	SenseRefScan	08:58:17	08:58:26	0.1	SmartBreast	08:58:28	08:59:18	0.8	STIR_TSE_tra	08:59:44	09:03:29	3.7	T2_TSE_cor	09:03:31	09:07:20	3.8	dyn_T1_2D_FFE	09:07:49	09:14:33	6.7	T1_KM_THRIVE_HR_tra	09:15:16	09:18:30	3.2	CoilSurveyScan	09:18:49	09:18:55	0.1	SenseRefScan	09:19:00	09:19:08	0.1	T2_MVXD_Axilla
2017	2	Breast	posterior	24.9	6.4	31.3	23.1	1.8	8.2	0.6	1.8	27.3	CoilSurveyScan	08:19:04	08:19:13	0.1	SenseRefScan	08:19:17	08:19:26	0.1	SmartBreast	08:19:29	08:20:19	0.8	STIR_TSE_tra	08:20:51	08:24:36	3.8	T2_TSE_cor	08:24:39	08:28:28	3.8	CoilSurveyScan	08:29:15	08:29:20	0.1	SenseRefScan	08:29:24	08:29:32	0.1	dyn_T1_2D_FFE	08:29:34	08:36:20	6.8	T1_KM_THRIVE_HR_tra	08:36:23	08:39:42	3.3	T2_MVXD_Axilla
2017	2	Breast	sense_knee_16_aci	36.7	6.4	43.1	32.9	3.8	10.2	6.6	5.9	49.2	CoilSurveyScan	08:36:03	08:36:10	0.1	SmartBreast	08:36:25	08:36:38	0.2	CoilSurveyScan	08:38:02	08:38:11	0.1	SenseRefScan	08:38:15	08:38:24	0.1	SmartBreast	08:38:26	08:39:16	0.8	STIR_TSE_tra	08:39:50	08:43:36	3.8	T2_TSE_cor	08:43:39	08:47:55	4.3	Silicone_Only Achieva	08:48:10	08:52:49	4.7	Silicone_SUP Achieva	08:52:52	08:56:02	3.2	dyn_T1_2D_FFE_RL
2017	10	Breast	anterior	21.7	6.8	28.5	19.8	1.9	8.7	4	6.6	32.2	CoilSurveyScan	15:59:04	15:59:12	0.1	SenseRefScan	15:59:16	15:59:25	0.1	SmartBreast	15:59:27	16:00:17	0.8	STIR_TSE_tra	16:01:16	16:05:33	4.3	dyn_T1_2D_FFE_RL	16:05:45	16:12:47	7	T1_KM_THRIVE_HR_tra	16:13:15	16:16:28	3.2	T2_MVXD_Axilla	16:16:38	16:20:45	4.1
2017	8	Breast	anterior	25.6	7.4	33	23.6	2	9.4	8.1	0.6	34.4	CoilSurveyScan	15:09:14	15:09:22	0.1	SenseRefScan	15:09:27	15:09:35	0.1	SmartBreast	15:09:38	15:10:28	0.8	STIR_TSE_tra	15:11:08	15:14:54	3.8	T2_TSE_cor	15:14:56	15:19:26	4.5	dyn_T1_2D_FFE	15:19:57	15:26:42	6.7	T1_KM_THRIVE_HR_tra	15:26:44	15:30:05	3.3	T2_MVXD_Axilla	15:30:43	15:34:50	4.1
2017	1	Breast	sense_knee_16_aci	25.7	7.5	33.2	23.5	2.3	9.8	14.8	0.7	41.2	CoilSurveyScan	07:38:00	07:38:32	0.5	SenseRefScan	07:38:37	07:38:46	0.1	SmartBreast	07:38:48	07:39:38	0.8	STIR_TSE_tra	07:40:07	07:43:52	3.7	T2_TSE_cor	07:43:55	07:47:43	3.8	dyn_T1_2D_FFE	07:48:46	07:55:32	6.8	T1_KM_THRIVE_HR_tra	07:55:47	07:59:07	3.3	CoilSurveyScan	07:59:17	07:59:22	0.1	SenseRefScan	07:59:28	07:59:36	0.1	T2_MVXD_Axilla
2017	11	Breast	nvc_base	33	7.5	40.5	29.2	3.8	11.4	10.8	7	50.8	CoilSurveyScan	15:54:11	15:54:19	0.1	SenseRefScan	15:54:24	15:54:32	0.1	SmartBreast	15:54:35	15:55:25	0.8	STIR_TSE_tra	15:56:09	15:59:54	3.8	T2_TSE_cor	15:59:57	16:05:31	5.6	T2_TSE_cor	16:07:41	16:12:20	4.6	dyn_T1_2D_FFE	16:12:41	16:19:24	6.7	T1_KM_THRIVE_HR_tra	16:19:27	16:22:42	3.2	T2_MVXD_Axilla	16:23:03	16:27:10	4.1
2017	4	Breast	sense_ankle_8_aci	25.4	8	33.5	22.8	2.6	10.6	0.6	0.8	26.8	CoilSurveyScan	09:56:13	09:56:21	0.1	SenseRefScan	09:56:25	09:56:33	0.1	SmartBreast	09:56:36	09:57:25	0.8	STIR_TSE_tra	09:58:41	10:02:26	3.7	T2_TSE_cor	10:02:44	10:06:33	3.8	dyn_T1_2D_FFE	10:07:14	10:14:08	6.9	T1_KM_THRIVE_HR_tra	10:14:11	10:17:19	3.1	T2_MVXD_Axilla	10:17:31	10:21:38	4.1
2017	8	Breast	sense_small_extr_8_aci	29	8.1	37.1	25.1	3.9	12	11	7.8	47.8	CoilSurveyScan	14:39:04	14:39:13	0.1	SenseRefScan	14:39:18	14:39:26	0.1	SmartBreast	14:39:28	14:40:19	0.8	STIR_TSE_tra	14:41:09	14:45:25	4.3	T2_TSE_cor	14:45:28	14:50:50	5.4	dyn_T1_2D_FFE	14:53:04	15:00:03	7	T1_KM_THRIVE_HR_tra	15:00:06	15:03:20	3.2	T2_MVXD_Axilla	15:03:57	15:08:04	4.1
2017	2	Breast	nvc_base	26	8.2	34.2	24.4	1.6	9.9	0.1	8	34.2	CoilSurveyScan	08:40:39	08:40:47	0.1	SenseRefScan	08:40:53	08:41:01	0.1	SmartBreast	08:41:04	08:41:54	0.8	STIR_TSE_tra	08:42:26	08:46:11	3.8	T2_TSE_cor	08:46:14	08:50:43	4.5	dyn_T1_2D_FFE_RL	08:51:21	08:58:49	7.5	T1_KM_THRIVE_HR_tra	08:58:51	09:02:04	3.2	CoilSurveyScan	09:02:11	09:02:16	0.1	SenseRefScan	09:02:22	09:02:31	0.1	T2_MVXD_Axilla
2017	6	Breast	sense_wrist_8_aci	33.1	8.2	41.3	31.7	1.4	9.6	6.9	7.6	47.6	CoilSurveyScan	11:08:57	11:09:05	0.1	SenseRefScan	11:09:09	11:09:18	0.1	SmartBreast	11:09:20	11:10:10	0.8	STIR_TSE_tra	11:11:02	11:14:46	3.7	T2_TSE_cor	11:14:50	11:18:39	3.8	Silicone_Only Achieva	11:18:47	11:23:42	4.9	Silicone_SUP Achieva	11:23:45	11:27:17	3.5	dyn_T1_2D_FFE	11:27:24	11:34:27	7.1	T1_KM_THRIVE_HR_tra	11:34:30	11:37:57	3.5	T2_MVXD_Axilla
2017	2	Breast	sense_ankle_8_aci	22.2	8.3	30.5	18.9	3.3	11.6	3.7	8.1	34	CoilSurveyScan	08:22:20	08:22:28	0.1	SenseRefScan	08:22:32	08:22:41	0.1	SmartBreast	08:22:43	08:23:32	0.8	STIR_TSE_tra	08:24:00	08:27:44	3.7	dyn_T1_2D_FFE	08:28:24	08:35:07	6.7	T1_KM_THRIVE_HR_tra	08:35:10	08:38:24	3.2	T2_MVXD_Axilla	08:40:26	08:44:33	4.1
2017	11	Breast	anterior	27.3	8.3	35.6	24	3.3	11.6	8.3	1.1	36.7	CoilSurveyScan	15:50:55	15:51:03	0.1	SenseRefScan	15:51:07	15:51:16	0.1	SmartBreast	15:51:18	15:52:08	0.8	STIR_TSE_tra	15:52:46	15:57:20	4.6	T2_TSE_cor	15:57:46	16:01:36	3.8	dyn_T1_2D_FFE_RL	16:03:37	16:10:35	7	T1_KM_THRIVE_HR_tra	16:10:38	16:14:06	3.5	T2_MVXD_Axilla	16:14:10	16:18:12	4
2017	7	Breast	anterior	26.2	8.4	34.6	23.5	2.6	11.1	13.3	4.1	43.6	CoilSurveyScan	13:22:58	13:23:07	0.1	SenseRefScan	13:23:11	13:23:20	0.1	SmartBreast	13:23:22	13:24:13	0.8	STIR_TSE_tra	13:24:54	13:28:39	3.8	T2_TSE_cor	13:29:09	13:32:59	3.8	dyn_T1_2D_FFE	13:33:40	13:40:58	7.3	T1_KM_THRIVE_HR_tra	13:41:22	13:44:47	3.4	T2_MVXD_Axilla	13:45:01	13:49:08	4.1
2017	10	Breast	sense_breast_7m_aci	21	8.5	29.5	19.3	1.8	10.3	9.1	0.8	31	CoilSurveyScan	15:45:27	15:45:35	0.1	SenseRefScan	15:45:39	15:45:48	0.1	SmartBreast	15:45:50	15:46:40	0.8	STIR_TSE_tra	15:47:21	15:51:06	3.7	dyn_T1_2D_FFE_RL	15:51:40	15:58:47	7.1	T1_KM_THRIVE_HR_tra	15:58:49	16:02:01	3.2	T2_MVXD_Axilla	16:02:23	16:06:30	4.1
2017	11	Breast	anterior	25.4	8.5	33.9	22.8	2.6	11.1	3.3	7.7	36.3	CoilSurveyScan	15:21:34	15:21:43	0.1	SenseRefScan	15:21:47	15:21:50	0	SenseRefScan	15:22:11	15:22:20	0.2	SmartBreast	15:22:23	15:23:13	0.8	STIR_TSE_tra	15:23:58	15:27:43	3.8	T2_TSE_cor	15:27:46	15:31:35	3.8	dyn_T1_2D_FFE	15:32:11	15:38:53	6.7	T1_KM_THRIVE_HR_tra	15:38:56	15:42:08	3.2	T2_MVXD_Axilla	15:42:49	15:46:57	4.1
2017	2	Breast	sense_breast_7m_aci	25.6	8.6	34.2	23.8	1.8	10.5	4.2	0.9	30.7	CoilSurveyScan	08:41:20	08:41:27	0.1	SenseRefScan	08:41:32	08:41:41	0.1	SmartBreast	08:41:43	08:42:33	0.8	STIR_TSE_tra	08:43:12	08:46:57	3.7	T2_TSE_cor	08:47:00	08:50:49	3.8	dyn_T1_2D_FFE	08:51:13	08:58:48	7.6	T1_KM_THRIVE_HR_tra	08:58:51	09:02:20	3.5	T2_MVXD_Axilla	09:02:52	09:06:55	4
2017	4	Breast	posterior	34.8	8.7	43.5	31.9	2.9	11.5	0.3	1.8	36.8	CoilSurveyScan	09:28:06	09:28:14	0.1	SenseRefScan	09:28:19	09:28:28	0.1	SmartBreast	09:28:30	09:29:21	0.8	STIR_TSE_tra	09:30:00	09:33:45	3.8	T2_TSE_cor	09:33:58	09:38:14	4.3	Silicone_Only Achieva	09:38:41	09:43:24	4.7	Silicone_SUP Achieva	09:43:27	09:46:53	3.4	dyn_T1_2D_FFE_RL	09:47:57	09:54:55	7	T1_KM_THRIVE_HR_tra	09:54:57	09:58:31	3.6	T2_MVXD_Axilla
2017	4	Breast	sense_breast_7m_aci	27.2	8.8	36.1	25.7	1.6	10.4	5.3	8.5	41.1	CoilSurveyScan	09:29:00	09:29:07	0.1	SenseRefScan	09:29:12	09:29:20	0.1	SmartBreast	09:29:23	09:30:12	0.8	STIR_TSE_tra	09:30:37	09:34:22	3.7	T2_TSE_cor	09:34:24	09:37:13	2.8	T2_TSE_cor	09:37:20	09:41:06	3.8	dyn_T1_2D_FFE_RL	09:41:49	09:48:49	7	T1_KM_THRIVE_HR_tra	09:48:51	09:52:06	3.2	T2_MVXD_Axilla	09:52:13	09:56:15	4
2017	8	Breast	anterior	34.5	8.8	43.3	31.2	3.3	12.1	7	6.5	48	CoilSurveyScan	13:22:18	13:22:26	0.1	SenseRefScan	13:22:30	13:22:38	0.1	SmartBreast	13:22:41	13:23:31	0.8	STIR_TSE_tra	13:24:21	13:28:06	3.8	T2_TSE_cor	13:28:30	13:32:20	3.8	dyn_T1_2D_FFE_RL	13:32:28	13:40:08	7.7	T1_KM_THRIVE_HR_tra	13:40:34	13:43:59	3.4	T2_MVXD_Axilla	13:44:08	13:48:15	4.1	T1_KM_THRIVE_HR_tra	13:48:20	13:51:44	3.4	T1_KM_THRIVE_HR_tra
2017	11	Breast	sense_breast_7m_aci	21.4	9	30.4	20.1	1.3	10.3	0.2	8.7	30.3	CoilSurveyScan	16:27:34	16:27:42	0.1	SenseRefScan	16:27:47	16:27:56	0.1	SmartBreast	16:27:59	16:28:49	0.8	STIR_TSE_tra	16:29:22	16:33:38	4.3	dyn_T1_2D_FFE_RL	16:34:02	16:41:29	7.5	T1_KM_THRIVE_HR_tra	16:41:32	16:44:42	3.2	T2_MVXD_Axilla	16:44:50	16:48:56	4.1
2017	2	Breast	nvc_base	23.2	9	32.2	20.6	2.6	11.6	9.2	4	36.4	CoilSurveyScan	09:02:15	09:02:24	0.1	SenseRefScan	09:02:28	09:02:37	0.1	SmartBreast	09:02:39	09:03:30	0.8	STIR_TSE_tra	09:04:27	09:08:12	3.8	dyn_T1_2D_FFE_RL	09:09:20	09:17:19	8	T1_KM_THRIVE_HR_tra	09:17:22	09:20:43	3.4	CoilSurveyScan	09:20:56	09:21:01	0.1	SenseRefScan	09:21:07	09:21:16	0.1	T2_MVXD_Axilla	09:21:18	09:25:25	4.1
2017	6	Breast	sense_breast_7m_aci	25	9	34	22.9	2.1	11.1	3.9	8.3	37.3	CoilSurveyScan	11:43:13	11:43:20	0.1	SenseRefScan	11:43:25	11:43:33	0.1	SmartBreast	11:43:36	11:44:25	0.8	STIR_TSE_tra	11:45:15	11:48:59	3.7	T2_TSE_cor	11:49:02	11:52:51	3.8	CoilSurveyScan	11:53:35	11:53:40	0.1	SenseRefScan	11:53:44	11:53:52	0.1	dyn_T1_2D_FFE	11:53:54	12:00:41	6.8	T1_KM_THRIVE_HR_tra	12:00:43	12:03:52	3.1	T2_MVXD_Axilla
2017	13	Breast	anterior	21	9.1	30.1	19.2	1.8	10.9	0.2	8.2	29.5	CoilSurveyScan	16:14:34	16:14:43	0.1	SenseRefScan	16:14:46	16:14:55	0.1	SmartBreast	16:14:58	16:15:48	0.8	STIR_TSE_tra	16:16:35	16:20:20	3.8	dyn_T1_2D_FFE	16:20:46	16:27:32	6.8	T1_KM_THRIVE_HR_tra	16:27:35	16:30:47	3.2	CoilSurveyScan	16:31:08	16:31:14	0.1	SenseRefScan	16:31:19	16:31:28	0.1	T2_MVXD_Axilla	16:31:30	16:35:36	4.1
2017	14	Breast	nvc_base	21.7	9.3	31	19.3	2.3	11.6	0.2	8.8	30.8	CoilSurveyScan	17:29:14	17:29:22	0.1	SenseRefScan	17:29:26	17:29:35	0.1	SmartBreast	17:29:37	17:30:27	0.8	STIR_TSE_tra	17:31:11	17:34:57	3.8	dyn_T1_2D_FFE	17:36:05	17:43:02	7	T1_KM_THRIVE_HR_tra	17:43:04	17:46:14	3.2	CoilSurveyScan	17:46:26	17:46:32	0.1	SenseRefScan	17:46:38	17:46:47	0.1	T2_MVXD_Axilla	17:46:49	17:50:55	4.1
2017	6	Breast	anterior	22.7	9.5	32.3	21.3	1.4	11	1	9.1	32.8	CoilSurveyScan	11:28:00	11:28:08	0.1	SenseRefScan	11:28:12	11:28:21	0.1	SmartBreast	11:28:23	11:29:13	0.8	STIR_TSE_tra	11:29:41	11:33:57	4.3	dyn_T1_2D_FFE_RL	11:34:31	11:36:07	1.6	dyn_T1_2D_FFE_RL	11:36:13	11:43:08	6.9	T1_KM_THRIVE_HR_tra	11:43:11	11:46:25	3.2	T2_MVXD_Axilla	11:46:37	11:50:44	4.1
2017	12	Breast	nvc_base	37.2	9.5	46.7	32.8	4.5	14	8.8	1.1	47.1	CoilSurveyScan	15:33:06	15:33:14	0.1	SenseRefScan	15:33:19	15:33:27	0.1	SmartBreast	15:33:30	15:34:20	0.8	STIR_TSE_tra	15:34:54	15:38:39	3.8	T2_TSE_cor	15:40:34	15:44:51	4.3	Silicone_Only Achieva	15:45:10	15:49:59	4.8	Silicone_SUP Achieva	15:50:02	15:53:16	3.2	dyn_T1_2D_FFE_RL	15:53:44	16:01:44	8	T1_KM_THRIVE_HR_tra	16:01:46	16:05:14	3.5	T2_MVXD_Axilla
2017	8	Breast	anterior	21.5	9.6	31.1	19.2	2.3	11.8	5.2	7	33.8	CoilSurveyScan	14:48:18	14:48:26	0.1	SenseRefScan	14:48:30	14:48:39	0.1	SmartBreast	14:48:41	14:49:32	0.8	STIR_TSE_tra	14:50:18	14:54:03	3.8	dyn_T1_2D_FFE	14:55:04	15:01:54	6.8	T1_KM_THRIVE_HR_tra	15:01:57	15:05:21	3.4	T2_MVXD_Axilla	15:05:43	15:09:50	4.1
2017	3	Breast	sense_breast_7m_aci	22.9	9.6	32.5	20	2.9	12.5	6.5	6.9	36.3	CoilSurveyScan	09:03:54	09:04:01	0.1	SenseRefScan	09:04:06	09:04:14	0.1	SmartBreast	09:04:17	09:05:07	0.8	CoilSurveyScan	09:06:24	09:06:29	0.1	SmartBreast	09:06:33	09:07:23	0.8	STIR_TSE_tra	09:07:55	09:11:40	3.7	dyn_T1_2D_FFE_RL	09:12:16	09:19:18	7	T1_KM_THRIVE_HR_tra	09:19:30	09:22:42	3.2	T2_MVXD_Axilla	09:22:46	09:26:48	4
2017	1	Breast	sense_knee_16_aci	26.6	9.6	36.2	24.8	1.8	11.4	13.3	5.3	45.2	CoilSurveyScan	08:05:10	08:05:42	0.5	SenseRefScan	08:05:46	08:05:54	0.1	SmartBreast	08:05:57	08:06:47	0.8	STIR_TSE_tra	08:07:32	08:11:17	3.7	T2_TSE_cor	08:11:38	08:15:28	3.8	dyn_T1_2D_FFE_RL	08:15:54	08:23:39	7.8	T1_KM_THRIVE_HR_tra	08:23:42	08:27:39	3.9	T2_MVXD_Axilla	08:27:44	08:31:46	4
2017	8	Breast	nvc_base	29.3	9.7	39	24.3	5	14.7	10.7	1.1	41	CoilSurveyScan	13:21:41	13:21:49	0.1	SenseRefScan	13:21:53	13:22:02	0.1	SmartBreast	13:22:04	13:22:54	0.8	STIR_TSE_tra	13:24:25	13:28:10	3.8	T2_TSE_cor	13:28:39	13:33:09	4.5	dyn_T1_2D_FFE_RL	13:33:49	13:41:05	7.3	T1_KM_THRIVE_HR_tra	13:41:08	13:44:28	3.3	CoilSurveyScan	13:44:53	13:44:58	0.1	SenseRefScan	13:45:03	13:45:11	0.1	T2_MVXD_Axilla
2017	2	Breast	anterior	35.8	9.8	45.6	24.4	11.4	21.2	8.8	8.8	53.4	CoilSurveyScan	08:41:43	08:41:52	0.1	SenseRefScan	08:41:56	08:42:05	0.1	SmartBreast	08:42:08	08:42:36	0.5	CoilSurveyScan	08:51:13	08:51:21	0.1	SenseRefScan	08:51:25	08:51:34	0.1	SmartBreast	08:51:36	08:52:27	0.8	STIR_TSE_tra	08:52:57	08:56:42	3.8	T2_TSE_cor	08:56:45	08:56:48	0	T2_TSE_cor	08:57:01	09:01:44	4.7	dyn_T1_2D_FFE
2017	6	Breast	sense_shoulder8_dci	30.1	9.9	40	24.3	5.8	15.7	2.4	1.2	33.7	CoilSurveyScan	14:47:13	14:47:21	0.1	SenseRefScan	14:47:26	14:47:34	0.1	SmartBreast	14:47:37	14:48:27	0.8	SmartBreast	14:52:31	14:53:22	0.8	STIR_TSE_tra	14:53:54	14:57:40	3.8	T2_TSE_cor	14:57:42	15:02:12	4.5	dyn_T1_2D_FFE	15:02:45	15:09:30	6.7	T1_KM_THRIVE_HR_tra	15:09:32	15:12:48	3.3	T2_MVXD_Axilla	15:13:13	15:17:20	4.1
2017	9	Breast	anterior	28.1	10.1	38.2	23.2	4.9	15	10	1	39	CoilSurveyScan	15:07:14	15:07:22	0.1	SenseRefScan	15:07:26	15:07:35	0.1	SmartBreast	15:07:37	15:08:27	0.8	STIR_TSE_tra	15:09:27	15:13:12	3.8	dyn_T1_2D_FFE_RL	15:14:52	15:21:55	7.1	T1_KM_THRIVE_HR_tra	15:22:07	15:25:19	3.2	T2_MVXD_Axilla	15:25:23	15:29:25	4	T2_MVXD_Axilla	15:31:15	15:35:18	4.1
2017	2	Breast	sense_knee_16_aci	21	10.2	31.1	19	2	12.1	8.5	5.3	34.7	CoilSurveyScan	08:17:15	08:17:23	0.1	SenseRefScan	08:17:27	08:17:36	0.1	SmartBreast	08:17:37	08:18:27	0.8	STIR_TSE_tra	08:19:15	08:23:00	3.7	dyn_T1_2D_FFE	08:23:44	08:30:32	6.8	T1_KM_THRIVE_HR_tra	08:30:34	08:33:50	3.3	T2_MVXD_Axilla	08:34:06	08:38:13	4.1
2017	4	Breast	posterior	24.6	10.5	35.1	23.2	1.4	11.9	0.3	10.2	35.1	CoilSurveyScan	10:57:01	10:57:09	0.1	SenseRefScan	10:57:14	10:57:22	0.1	SmartBreast	10:57:25	10:58:15	0.8	STIR_TSE_tra	10:58:43	11:02:29	3.8	T2_TSE_cor	11:02:31	11:06:34	4	dyn_T1_2D_FFE	11:06:59	11:13:43	6.7	T1_KM_THRIVE_HR_tra	11:13:45	11:16:56	3.2	CoilSurveyScan	11:17:08	11:17:13	0.1	SenseRefScan	11:17:20	11:17:29	0.1	T2_MVXD_Axilla
2017	1	Breast	nvc_base	28.6	10.6	39.2	24.1	4.5	15.2	15.1	10.4	54.1	CoilSurveyScan	08:50:08	08:50:40	0.5	SenseRefScan	08:50:45	08:50:53	0.1	SmartBreast	08:50:56	08:51:45	0.8	STIR_TSE_tra	08:53:04	08:56:48	3.7	T2_TSE_cor	08:57:00	09:01:21	4.4	dyn_T1_2D_FFE_RL	09:03:02	09:10:08	7.1	T1_KM_THRIVE_HR_tra	09:10:25	09:13:41	3.3	T2_MVXD_Axilla	09:14:37	09:18:43	4.1
2017	5	Breast	nvc_base	36.7	10.6	47.3	33.7	2.9	13.5	0.4	5.5	42.6	CoilSurveyScan	11:23:08	11:23:16	0.1	SenseRefScan	11:23:20	11:23:29	0.1	SmartBreast	11:23:31	11:24:22	0.8	STIR_TSE_tra	11:25:36	11:29:39	4	T2_TSE_cor	11:29:42	11:34:38	4.9	Silicone_Only Achieva	11:34:45	11:39:24	4.7	Silicone_SUP Achieva	11:39:27	11:42:37	3.2	dyn_T1_2D_FFE_RL	11:43:26	11:51:42	8.3	T1_KM_THRIVE_HR_tra	11:51:45	11:54:58	3.2	CoilSurveyScan
2017	11	Breast	sense_breast_7m_aci	22.9	11	33.9	20	3	13.9	8	10.8	41.7	CoilSurveyScan	16:07:25	16:07:33	0.1	SenseRefScan	16:07:37	16:07:45	0.1	SmartBreast	16:07:47	16:08:36	0.8	STIR_TSE_tra	16:09:57	16:13:42	3.7	dyn_T1_2D_FFE	16:14:29	16:22:02	7.5	T1_KM_THRIVE_HR_tra	16:22:04	16:25:31	3.4	T2_MVXD_Axilla	16:26:12	16:30:19	4.1
2017	1	Breast	nvc_base	37.6	11.1	48.7	31.7	5.9	17	25	10.8	73.4	CoilSurveyScan	07:55:07	07:55:39	0.5	SenseRefScan	07:55:43	07:55:52	0.1	SmartBreast	07:55:54	07:56:45	0.8	STIR_TSE_tra	07:57:51	08:01:41	3.8	STIR_TSE_tra	08:01:43	08:01:44	0	STIR_TSE_tra	08:02:49	08:07:02	4.2	dyn_T1_2D_FFE_RL	08:07:07	08:08:51	1.7	CoilSurveyScan	08:11:38	08:11:47	0.1	SenseRefScan	08:11:52	08:12:01	0.1	SmartBreast
2017	2	Breast	sense_ankle_8_aci	25.2	11.2	36.4	23.1	2.1	13.3	0.3	5.7	31.2	CoilSurveyScan	08:20:37	08:20:45	0.1	SenseRefScan	08:20:50	08:20:58	0.1	SmartBreast	08:21:01	08:21:51	0.8	STIR_TSE_tra	08:22:40	08:26:25	3.7	T2_TSE_cor	08:26:28	08:30:16	3.8	dyn_T1_2D_FFE	08:31:03	08:38:06	7.1	T1_KM_THRIVE_HR_tra	08:38:09	08:41:27	3.3	T2_MVXD_Axilla	08:41:43	08:45:50	4.1
2017	4	Breast	sense_shoulder8_dci	21.4	11.4	32.8	19.5	1.8	13.3	0.5	11	32.8	CoilSurveyScan	09:42:09	09:42:17	0.1	SenseRefScan	09:42:22	09:42:31	0.1	SmartBreast	09:42:33	09:43:23	0.8	STIR_TSE_tra	09:44:02	09:47:47	3.8	dyn_T1_2D_FFE	09:47:52	09:54:56	7.1	T1_KM_THRIVE_HR_tra	09:55:00	09:58:14	3.2	CoilSurveyScan	09:59:02	09:59:08	0.1	SenseRefScan	09:59:13	09:59:22	0.1	T2_MVXD_Axilla	09:59:25	10:03:31	4.1
2017	8	Breast	sense_breast_7m_aci	32.1	11.8	43.9	28.2	3.9	15.7	1.5	6.4	40	CoilSurveyScan	13:12:27	13:12:35	0.1	SenseRefScan	13:12:40	13:12:48	0.1	SmartBreast	13:12:50	13:13:39	0.8	STIR_TSE_tra	13:15:09	13:19:25	4.3	T2_TSE_cor	13:20:08	13:24:24	4.3	dyn_T1_2D_FFE_RL	13:25:08	13:28:56	3.8	dyn_T1_2D_FFE_RL	13:29:37	13:36:31	6.9	T1_KM_THRIVE_HR_tra	13:36:34	13:40:18	3.7	T2_MVXD_Axilla	13:40:26	13:44:33	4.1
2017	11	Breast	nvc_base	25.7	12.2	37.9	23.5	2.2	14.4	3.7	11.3	40.7	CoilSurveyScan	15:17:34	15:17:42	0.1	SenseRefScan	15:17:46	15:17:55	0.1	SmartBreast	15:17:57	15:18:47	0.8	STIR_TSE_tra	15:19:48	15:23:33	3.8	T2_TSE_cor	15:23:36	15:27:26	3.8	dyn_T1_2D_FFE_RL	15:28:06	15:35:20	7.2	T1_KM_THRIVE_HR_tra	15:35:22	15:38:37	3.2	CoilSurveyScan	15:38:44	15:38:49	0.1	SenseRefScan	15:38:56	15:39:05	0.1	T2_MVXD_Axilla
2017	9	Breast	anterior	31	12.2	43.1	27.2	3.8	15.9	1.4	11.7	44.1	CoilSurveyScan	15:37:57	15:38:05	0.1	SenseRefScan	15:38:09	15:38:18	0.1	SmartBreast	15:38:20	15:39:10	0.8	STIR_TSE_tra	15:40:55	15:44:41	3.8	T2_TSE_cor	15:44:43	15:48:33	3.8	STIR_TSE_tra	15:49:40	15:53:26	3.8	dyn_T1_2D_FFE_RL	15:53:54	16:01:12	7.3	T1_KM_THRIVE_HR_tra	16:01:15	16:04:34	3.3	T2_MVXD_Axilla	16:04:48	16:08:55	4.1
2017	9	Breast	sense_knee_16_aci	33.6	12.2	45.8	31	2.6	14.7	0.3	11.4	45.3	CoilSurveyScan	15:29:27	15:29:35	0.1	SenseRefScan	15:29:39	15:29:47	0.1	SmartBreast	15:29:50	15:30:40	0.8	STIR_TSE_tra	15:31:22	15:35:07	3.7	T2_TSE_cor	15:35:10	15:38:59	3.8	Silicone_Only Achieva	15:39:04	15:43:55	4.9	Silicone_SUP Achieva	15:43:59	15:47:08	3.2	dyn_T1_2D_FFE_RL	15:48:00	15:55:00	7	T1_KM_THRIVE_HR_tra	15:55:33	15:58:47	3.2	T2_MVXD_Axilla
2017	9	Breast	nvc_base	25.3	12.7	38	23.3	2	14.8	0.8	0.7	26.8	CoilSurveyScan	14:03:15	14:03:29	0.2	SenseRefScan	14:03:33	14:03:42	0.1	SmartBreast	14:03:44	14:04:34	0.8	STIR_TSE_tra	14:04:59	14:08:44	3.8	T2_TSE_cor	14:08:51	14:12:40	3.8	dyn_T1_2D_FFE	14:13:02	14:20:04	7	T1_KM_THRIVE_HR_tra	14:20:06	14:23:25	3.3	T2_MVXD_Axilla	14:24:26	14:28:33	4.1
2017	11	Breast	nvc_base	24.3	12.8	37.1	21.3	3	15.8	8.5	9	41.8	CoilSurveyScan	14:22:15	14:22:23	0.1	SenseRefScan	14:22:27	14:22:36	0.1	SmartBreast	14:22:38	14:23:28	0.8	STIR_TSE_tra	14:24:24	14:28:40	4.3	dyn_T1_2D_FFE_RL	14:29:43	14:37:23	7.7	T1_KM_THRIVE_HR_tra	14:37:26	14:40:53	3.5	T2_MVXD_Axilla	14:41:00	14:41:02	0	CoilSurveyScan	14:41:31	14:41:37	0.1	SenseRefScan	14:41:41	14:41:49	0.1	T1_KM_THRIVE_HR_tra
2017	7	Breast	anterior	25.9	12.8	38.7	24.2	1.7	14.4	16.6	11.2	53.7	CoilSurveyScan	12:33:48	12:33:56	0.1	SenseRefScan	12:34:00	12:34:09	0.1	SmartBreast	12:34:12	12:35:01	0.8	STIR_TSE_tra	12:35:34	12:39:50	4.3	T2_TSE_cor	12:39:53	12:44:35	4.7	dyn_T1_2D_FFE_RL	12:45:25	12:52:19	6.9	T1_KM_THRIVE_HR_tra	12:52:21	12:55:35	3.2	T2_MVXD_Axilla	12:55:39	12:59:42	4
2017	8	Breast	anterior	25.7	12.9	38.6	23.5	2.3	15.1	6.4	9.6	41.6	CoilSurveyScan	14:41:15	14:41:23	0.1	SenseRefScan	14:41:27	14:41:36	0.1	SmartBreast	14:41:38	14:42:28	0.8	STIR_TSE_tra	14:43:05	14:46:51	3.8	T2_TSE_cor	14:47:09	14:50:59	3.8	dyn_T1_2D_FFE	14:51:36	14:58:20	6.7	T1_KM_THRIVE_HR_tra	14:58:24	15:02:20	3.9	T2_MVXD_Axilla	15:02:54	15:06:57	4.1
2017	1	Breast	nvc_base	26.1	13	39	24.3	1.8	14.7	14.4	3.6	44	CoilSurveyScan	08:01:24	08:01:56	0.5	SenseRefScan	08:02:01	08:02:09	0.1	SmartBreast	08:02:11	08:03:01	0.8	STIR_TSE_tra	08:03:43	08:07:27	3.7	T2_TSE_cor	08:07:31	08:12:14	4.7	dyn_T1_2D_FFE_RL	08:12:56	08:19:53	6.9	T1_KM_THRIVE_HR_tra	08:19:55	08:23:12	3.3	T2_MVXD_Axilla	08:23:21	08:27:28	4.1
2017	2	Breast	nvc_base	33.6	13.1	46.6	31.2	2.4	15.5	6.9	0.5	41	CoilSurveyScan	08:41:52	08:42:00	0.1	SenseRefScan	08:42:05	08:42:13	0.1	SmartBreast	08:42:16	08:43:06	0.8	STIR_TSE_tra	08:43:32	08:47:18	3.8	T2_TSE_cor	08:47:21	08:51:37	4.3	Silicone_Only Achieva	08:51:42	08:56:26	4.7	Silicone_SUP Achieva	08:56:28	08:59:41	3.2	dyn_T1_2D_FFE	09:01:09	09:07:53	6.7	T1_KM_THRIVE_HR_tra	09:07:56	09:11:10	3.2	T2_MVXD_Axilla
2017	2	Breast	sense_small_extr_8_aci	21.9	13.2	35.1	19.7	2.2	15.4	7.9	6.7	36.6	CoilSurveyScan	08:28:46	08:28:54	0.1	SenseRefScan	08:28:58	08:29:07	0.1	SmartBreast	08:29:09	08:29:59	0.8	STIR_TSE_tra	08:30:47	08:35:03	4.3	dyn_T1_2D_FFE_RL	08:35:36	08:42:38	7	T1_KM_THRIVE_HR_tra	08:43:09	08:46:23	3.2	T2_MVXD_Axilla	08:46:34	08:50:41	4.1
2017	4	Breast	sense_wrist_8_aci	38.8	13.5	52.3	35.8	2.9	16.4	9.7	10.7	59.2	CoilSurveyScan	10:02:05	10:02:13	0.1	SenseRefScan	10:02:17	10:02:26	0.1	SmartBreast	10:02:29	10:03:18	0.8	STIR_TSE_tra	10:04:00	10:07:45	3.7	T2_TSE_cor	10:08:16	10:12:32	4.3	Silicone_Only Achieva	10:12:40	10:17:28	4.8	Silicone_SUP Achieva	10:17:30	10:20:48	3.3	Silicone_SUP Achieva	10:21:45	10:24:59	3.2	dyn_T1_2D_FFE_RL	10:25:20	10:33:18	8	T1_KM_THRIVE_HR_tra
2017	5	Breast	anterior	29	14.1	43.1	25.2	3.8	17.9	6.9	2	37.9	CoilSurveyScan	10:28:26	10:28:34	0.1	SenseRefScan	10:28:39	10:28:48	0.1	SmartBreast	10:28:50	10:29:40	0.8	STIR_TSE_tra	10:30:53	10:34:39	3.8	T2_TSE_cor	10:34:41	10:40:39	6	dyn_T1_2D_FFE	10:41:23	10:48:10	6.8	T1_KM_THRIVE_HR_tra	10:48:12	10:51:24	3.2	CoilSurveyScan	10:51:54	10:52:00	0.1	SenseRefScan	10:52:04	10:52:13	0.1	T2_MVXD_Axilla
2017	7	Breast	nvc_base	21.6	14.3	35.9	19.4	2.2	16.5	10.1	0.7	32.3	CoilSurveyScan	15:26:24	15:26:38	0.2	SenseRefScan	15:26:42	15:26:50	0.1	SmartBreast	15:26:53	15:27:43	0.8	STIR_TSE_tra	15:28:40	15:32:29	3.8	dyn_T1_2D_FFE_RL	15:33:28	15:40:24	6.9	T1_KM_THRIVE_HR_tra	15:40:27	15:43:48	3.4	T2_MVXD_Axilla	15:43:56	15:47:58	4
2017	4	Breast	nvc_base	34.5	14.6	49.1	31.2	3.2	17.8	5.7	13.6	53.8	CoilSurveyScan	10:21:02	10:21:11	0.1	SenseRefScan	10:21:15	10:21:24	0.1	SmartBreast	10:21:26	10:22:16	0.8	STIR_TSE_tra	10:23:26	10:27:11	3.8	T2_TSE_cor	10:27:14	10:31:03	3.8	Silicone_Only Achieva	10:31:12	10:35:54	4.7	Silicone_SUP Achieva	10:35:58	10:39:17	3.3	dyn_T1_2D_FFE_RL	10:40:14	10:47:13	7	T1_KM_THRIVE_HR_tra	10:47:15	10:50:40	3.4	T2_MVXD_Axilla
2017	10	Breast	anterior	25.3	15.1	40.4	23.4	2	17.1	6.9	1.1	33.3	CoilSurveyScan	15:50:48	15:50:56	0.1	SenseRefScan	15:51:00	15:51:08	0.1	SmartBreast	15:51:11	15:52:01	0.8	STIR_TSE_tra	15:52:44	15:56:29	3.8	T2_TSE_cor	15:56:32	16:00:22	3.8	dyn_T1_2D_FFE_RL	16:01:11	16:08:28	7.3	T1_KM_THRIVE_HR_tra	16:08:31	16:11:48	3.3	T2_MVXD_Axilla	16:12:01	16:16:08	4.1
2017	2	Breast	nvc_base	27.2	15.4	42.6	24.6	2.5	17.9	9.3	14.1	50.5	CoilSurveyScan	08:36:40	08:36:48	0.1	SenseRefScan	08:36:53	08:37:01	0.1	SmartBreast	08:37:04	08:37:54	0.8	STIR_TSE_tra	08:38:33	08:42:49	4.3	T2_TSE_cor	08:42:52	08:47:21	4.5	CoilSurveyScan	08:48:28	08:48:34	0.1	SenseRefScan	08:48:38	08:48:47	0.1	dyn_T1_2D_FFE	08:48:49	08:55:45	6.9	T1_KM_THRIVE_HR_tra	08:55:47	08:58:59	3.2	CoilSurveyScan
2017	10	Breast	anterior	24.7	15.6	40.3	22.8	1.9	17.5	12.8	4.5	42	CoilSurveyScan	15:20:35	15:20:44	0.1	SenseRefScan	15:20:48	15:20:57	0.1	SmartBreast	15:20:59	15:21:50	0.8	STIR_TSE_tra	15:22:25	15:26:11	3.8	T2_TSE_cor	15:26:14	15:30:03	3.8	dyn_T1_2D_FFE	15:30:35	15:37:19	6.7	T1_KM_THRIVE_HR_tra	15:37:22	15:40:38	3.3	T2_MVXD_Axilla	15:41:10	15:45:17	4.1
2017	4	Breast	anterior	24.7	15.7	40.4	22.9	1.9	17.5	7.3	6.1	38.1	CoilSurveyScan	09:38:52	09:39:00	0.1	SenseRefScan	09:39:05	09:39:14	0.1	SmartBreast	09:39:16	09:40:06	0.8	STIR_TSE_tra	09:40:37	09:44:23	3.8	T2_TSE_cor	09:44:26	09:48:15	3.8	dyn_T1_2D_FFE	09:49:12	09:56:00	6.8	T1_KM_THRIVE_HR_tra	09:56:02	09:59:22	3.3	T2_MVXD_Axilla	09:59:32	10:03:35	4
2017	8	Breast	anterior	37.7	15.7	53.4	34.8	2.9	18.6	6	10.4	54.2	CoilSurveyScan	14:57:52	14:58:00	0.1	SenseRefScan	14:58:04	14:58:13	0.1	SmartBreast	14:58:14	14:59:05	0.8	STIR_TSE_tra	14:59:35	15:03:20	3.8	T2_TSE_cor	15:03:26	15:07:56	4.5	Silicone_Only Achieva	15:08:10	15:12:54	4.7	Silicone_SUP Achieva	15:12:56	15:16:07	3.2	Silicone_SUP Achieva	15:16:51	15:20:03	3.2	dyn_T1_2D_FFE_RL	15:20:59	15:27:55	6.9	T1_KM_THRIVE_HR_tra
2017	7	Breast	anterior	33.2	15.8	49	28.4	4.8	20.6	11.2	2.6	47	CoilSurveyScan	11:50:31	11:50:39	0.1	SenseRefScan	11:50:43	11:50:52	0.1	SmartBreast	11:50:54	11:51:44	0.8	SmartBreast	11:53:44	11:54:35	0.8	STIR_TSE_tra	11:56:02	11:59:48	3.8	T2_TSE_cor	11:59:50	12:03:40	3.8	DWIBS	12:04:17	12:18:51	14.6	CoilSurveyScan	12:19:15	12:19:21	0.1	SenseRefScan	12:19:26	12:19:34	0.1	T2_MVXD_Axilla
2017	7	Breast	nvc_base	28.3	15.9	44.2	23.1	5.2	21.1	7.8	11.2	47.3	CoilSurveyScan	13:57:00	13:57:08	0.1	SenseRefScan	13:57:13	13:57:21	0.1	SmartBreast	13:57:24	13:58:14	0.8	STIR_TSE_tra	14:00:44	14:04:29	3.8	T2_TSE_cor	14:04:35	14:08:24	3.8	dyn_T1_2D_FFE	14:10:35	14:17:20	6.7	T1_KM_THRIVE_HR_tra	14:17:22	14:20:40	3.3	CoilSurveyScan	14:20:49	14:20:54	0.1	SenseRefScan	14:20:58	14:21:09	0.2	T2_MVXD_Axilla
2017	2	Breast	sense_knee_16_aci	24.5	16.1	40.7	22.7	1.8	18	13.8	8.6	46.8	CoilSurveyScan	08:17:26	08:17:34	0.1	SenseRefScan	08:17:38	08:17:46	0.1	SmartBreast	08:17:49	08:18:39	0.8	STIR_TSE_tra	08:19:18	08:23:03	3.7	T2_TSE_cor	08:23:05	08:26:54	3.8	dyn_T1_2D_FFE	08:27:33	08:34:17	6.7	T1_KM_THRIVE_HR_tra	08:34:19	08:37:30	3.2	T2_MVXD_Axilla	08:37:50	08:41:57	4.1
2017	2	Breast	posterior	22.3	16.5	38.8	19.8	2.5	19	0.2	12.2	34.6	CoilSurveyScan	08:32:14	08:32:22	0.1	SenseRefScan	08:32:27	08:32:36	0.1	SmartBreast	08:32:38	08:33:28	0.8	STIR_TSE_tra	08:34:11	08:38:28	4.3	dyn_T1_2D_FFE_RL	08:39:54	08:46:55	7	T1_KM_THRIVE_HR_tra	08:46:58	08:50:12	3.2	T2_MVXD_Axilla	08:50:25	08:54:32	4.1
2017	2	Breast	sense_knee_16_aci	26.8	16.9	43.7	24.4	2.3	19.3	6.5	9.2	42.5	CoilSurveyScan	08:15:22	08:15:30	0.1	SenseRefScan	08:15:35	08:15:43	0.1	SmartBreast	08:15:46	08:16:36	0.8	STIR_TSE_tra	08:17:17	08:21:02	3.7	T2_TSE_cor	08:21:38	08:27:00	5.4	dyn_T1_2D_FFE	08:27:41	08:34:31	6.8	T1_KM_THRIVE_HR_tra	08:34:33	08:37:50	3.3	T2_MVXD_Axilla	08:38:02	08:42:08	4.1
2017	2	Breast	nvc_base	21.5	17	38.5	19.8	1.7	18.7	0.4	10.9	32.8	CoilSurveyScan	08:31:23	08:31:31	0.1	SenseRefScan	08:31:35	08:31:44	0.1	SmartBreast	08:31:46	08:32:36	0.8	STIR_TSE_tra	08:33:11	08:37:27	4.3	dyn_T1_2D_FFE_RL	08:38:13	08:45:11	7	T1_KM_THRIVE_HR_tra	08:45:13	08:48:33	3.3	T2_MVXD_Axilla	08:48:46	08:52:52	4.1
2017	6	Breast	anterior	27.7	18	45.7	24	3.7	21.7	5.7	10.3	43.7	CoilSurveyScan	11:42:53	11:43:01	0.1	SenseRefScan	11:43:05	11:43:14	0.1	SmartBreast	11:43:16	11:44:06	0.8	STIR_TSE_tra	11:44:55	11:48:41	3.8	T2_TSE_cor	11:49:29	11:53:19	3.8	dyn_T1_2D_FFE_RL	11:55:12	12:03:00	7.8	T1_KM_THRIVE_HR_tra	12:03:03	12:06:29	3.4	T2_MVXD_Axilla	12:06:33	12:10:35	4
2017	5	Breast	sense_breast_7m_aci	23.1	18.4	41.5	19.4	3.8	22.2	10.5	17.5	51.2	CoilSurveyScan	11:53:41	11:53:49	0.1	SenseRefScan	11:53:53	11:54:01	0.1	SmartBreast	11:54:04	11:54:54	0.8	STIR_TSE_tra	11:55:35	11:59:20	3.8	dyn_T1_2D_FFE_RL	12:01:47	12:08:43	6.9	T1_KM_THRIVE_HR_tra	12:09:04	12:12:17	3.2	CoilSurveyScan	12:12:20	12:12:25	0.1	SenseRefScan	12:12:31	12:12:39	0.1	T2_MVXD_Axilla	12:12:42	12:16:49	4.1
2017	9	Breast	anterior	21.9	18.6	40.5	19.5	2.4	21	12	9.9	43.9	CoilSurveyScan	15:34:41	15:34:49	0.1	SenseRefScan	15:34:53	15:35:02	0.1	SmartBreast	15:35:04	15:35:54	0.8	STIR_TSE_tra	15:36:33	15:40:18	3.8	dyn_T1_2D_FFE	15:41:29	15:48:34	7.1	T1_KM_THRIVE_HR_tra	15:48:37	15:51:47	3.2	CoilSurveyScan	15:52:07	15:52:13	0.1	SenseRefScan	15:52:18	15:52:27	0.1	T2_MVXD_Axilla	15:52:29	15:56:36	4.1
2017	9	Breast	anterior	14.2	18.7	32.8	12	2.2	20.8	7.9	18.3	40.4	CoilSurveyScan	13:44:24	13:44:32	0.1	SenseRefScan	13:44:37	13:44:46	0.1	SmartBreast	13:44:48	13:45:38	0.8	STIR_TSE_tra	13:46:44	13:51:00	4.3	dyn_T1_2D_FFE	13:51:58	13:58:34	6.6
2017	12	Breast	sense_breast_7m_aci	21.5	18.9	40.4	19.3	2.3	21.1	3.8	14.3	39.6	CoilSurveyScan	14:59:20	14:59:28	0.1	SenseRefScan	14:59:32	14:59:40	0.1	SmartBreast	14:59:42	15:00:32	0.8	STIR_TSE_tra	15:01:25	15:05:10	3.7	dyn_T1_2D_FFE	15:06:06	15:12:57	6.9	T1_KM_THRIVE_HR_tra	15:13:00	15:16:28	3.5	T2_MVXD_Axilla	15:16:44	15:20:51	4.1
2017	9	Breast	nvc_base	22.5	19.9	42.4	19.1	3.4	23.3	10.6	17.7	50.7	CoilSurveyScan	14:59:39	14:59:47	0.1	SenseRefScan	14:59:51	15:00:00	0.1	SmartBreast	15:00:02	15:00:53	0.8	STIR_TSE_tra	15:01:40	15:05:25	3.8	dyn_T1_2D_FFE	15:07:24	15:14:18	6.9	T1_KM_THRIVE_HR_tra	15:14:32	15:17:46	3.2	T2_MVXD_Axilla	15:18:03	15:22:09	4.1
2017	6	Breast	anterior	22.2	20	42.1	19.3	2.9	22.9	0.5	7.8	30.4	CoilSurveyScan	11:26:03	11:26:12	0.1	SenseRefScan	11:26:16	11:26:25	0.1	SmartBreast	11:26:27	11:27:17	0.8	STIR_TSE_tra	11:28:12	11:31:58	3.8	dyn_T1_2D_FFE_RL	11:33:30	11:40:28	7	T1_KM_THRIVE_HR_tra	11:40:30	11:43:48	3.3	T2_MVXD_Axilla	11:44:06	11:48:14	4.1
2017	7	Breast	sense_breast_7m_aci	24.3	20	44.2	22.8	1.4	21.4	7.7	19.7	51.6	CoilSurveyScan	12:28:36	12:28:44	0.1	SenseRefScan	12:28:48	12:28:56	0.1	SmartBreast	12:28:59	12:29:49	0.8	STIR_TSE_tra	12:30:13	12:33:58	3.7	T2_TSE_cor	12:34:00	12:37:49	3.8	dyn_T1_2D_FFE	12:38:28	12:45:14	6.8	T1_KM_THRIVE_HR_tra	12:45:16	12:48:34	3.3	T2_MVXD_Axilla	12:48:45	12:52:52	4.1
2017	2	Breast	nvc_base	20.8	21.6	42.4	19.2	1.6	23.2	5.6	9.8	36.2	CoilSurveyScan	08:51:37	08:51:45	0.1	SenseRefScan	08:51:49	08:51:58	0.1	SmartBreast	08:52:00	08:52:51	0.8	STIR_TSE_tra	08:53:20	08:57:05	3.8	dyn_T1_2D_FFE_RL	08:57:53	09:04:55	7	T1_KM_THRIVE_HR_tra	09:04:58	09:08:10	3.2	T2_MVXD_Axilla	09:08:20	09:12:27	4.1
2017	10	Breast	nvc_base	25.9	22	47.9	24	1.8	23.9	1.3	17.7	45	CoilSurveyScan	15:25:36	15:25:44	0.1	SenseRefScan	15:25:49	15:25:58	0.1	SmartBreast	15:26:00	15:26:50	0.8	STIR_TSE_tra	15:27:32	15:31:18	3.8	T2_TSE_cor	15:31:20	15:35:50	4.5	dyn_T1_2D_FFE	15:36:34	15:43:42	7.1	T1_KM_THRIVE_HR_tra	15:43:45	15:47:14	3.5	T2_MVXD_Axilla	15:47:26	15:51:29	4
2017	6	Breast	nvc_base	26.2	22.2	48.4	22.8	3.5	25.6	6.3	21.2	53.7	CoilSurveyScan	12:27:31	12:27:39	0.1	SenseRefScan	12:27:44	12:27:52	0.1	SmartBreast	12:27:55	12:28:45	0.8	STIR_TSE_tra	12:29:25	12:33:10	3.8	T2_TSE_cor	12:33:28	12:37:18	3.8	dyn_T1_2D_FFE	12:39:19	12:46:05	6.8	T1_KM_THRIVE_HR_tra	12:46:08	12:49:17	3.2	T2_MVXD_Axilla	12:49:36	12:53:43	4.1
2017	6	Breast	posterior	28.8	22.4	51.1	24.4	4.3	26.7	15	19.2	63	CoilSurveyScan	13:05:16	13:05:25	0.1	SenseRefScan	13:05:29	13:05:38	0.1	SmartBreast	13:05:40	13:06:30	0.8	STIR_TSE_tra	13:08:10	13:12:26	4.3	T2_TSE_cor	13:12:35	13:17:17	4.7	dyn_T1_2D_FFE_RL	13:18:49	13:25:46	7	T1_KM_THRIVE_HR_tra	13:25:49	13:29:10	3.4	T2_MVXD_Axilla	13:29:59	13:34:02	4
2017	10	Breast	anterior	24.4	23.1	47.5	22	2.4	25.5	9.3	15.1	48.9	CoilSurveyScan	15:19:52	15:20:01	0.1	SenseRefScan	15:20:05	15:20:14	0.1	SmartBreast	15:20:16	15:21:06	0.8	STIR_TSE_tra	15:21:49	15:24:37	2.8	STIR_TSE_tra	15:24:55	15:28:40	3.8	dyn_T1_2D_FFE	15:29:39	15:36:28	6.8	T1_KM_THRIVE_HR_tra	15:36:30	15:39:41	3.2	CoilSurveyScan	15:39:50	15:39:56	0.1	SenseRefScan	15:40:02	15:40:10	0.1	T2_MVXD_Axilla
2017	11	Breast	nvc_base	27.3	23.3	50.6	23.8	3.4	26.7	2.1	18.6	47.9	CoilSurveyScan	15:29:14	15:29:23	0.1	SenseRefScan	15:29:27	15:29:36	0.1	SmartBreast	15:29:38	15:30:28	0.8	STIR_TSE_tra	15:31:38	15:35:23	3.8	T2_TSE_cor	15:35:48	15:39:38	3.8	dyn_T1_2D_FFE_RL	15:41:13	15:48:48	7.6	T1_KM_THRIVE_HR_tra	15:48:50	15:52:16	3.4	T2_MVXD_Axilla	15:52:25	15:56:31	4.1
2017	9	Breast	sense_breast_7m_aci	27.6	24.2	51.8	24.6	3	27.1	19.9	18.8	66.3	CoilSurveyScan	15:00:32	15:00:40	0.1	SenseRefScan	15:00:43	15:00:52	0.1	SmartBreast	15:00:55	15:01:44	0.8	STIR_TSE_tra	15:02:35	15:06:51	4.3	T2_TSE_cor	15:07:13	15:11:56	4.7	dyn_T1_2D_FFE_RL	15:13:03	15:20:02	7	T1_KM_THRIVE_HR_tra	15:20:05	15:23:32	3.5	T2_MVXD_Axilla	15:24:02	15:28:08	4.1
2017	2	Breast	sense_breast_7m_aci	46.9	24.4	71.3	39.2	7.7	32.1	0.2	1.9	48.9	CoilSurveyScan	09:29:22	09:29:29	0.1	SenseRefScan	09:29:34	09:29:42	0.1	SmartBreast	09:29:44	09:30:34	0.8	STIR_TSE_tra	09:31:38	09:35:23	3.7	T2_TSE_cor	09:36:55	09:41:59	5.1	Silicone_Only Achieva	09:42:34	09:45:23	2.8	Silicone_Only Achieva	09:45:47	09:50:21	4.6	Silicone_SUP Achieva	09:50:24	09:50:49	0.4	Silicone_SUP Achieva	09:51:07	09:54:27	3.3	dyn_T1_2D_FFE_RL
2017	1	Breast	nvc_base	23.8	25.5	49.2	19.5	4.3	29.8	6.9	25.2	55.9	CoilSurveyScan	07:57:02	07:57:33	0.5	SenseRefScan	07:57:38	07:57:46	0.1	SmartBreast	07:57:49	07:58:38	0.8	STIR_TSE_tra	07:59:37	08:03:21	3.7	dyn_T1_2D_FFE_RL	08:06:18	08:13:11	6.9	T1_KM_THRIVE_HR_tra	08:13:14	08:16:27	3.2	T2_MVXD_Axilla	08:16:41	08:20:47	4.1
2017	4	Breast	anterior	72	25.7	97.6	11.7	60.3	86	26.3	15.1	113.3	CoilSurveyScan	10:16:03	10:16:11	0.1	SURVEY	10:16:15	10:16:41	0.4	SenseRefScan	10:18:39	10:18:49	0.2	dyn_T1W_FFE_3D	10:18:51	10:22:06	3.2	CoilSurveyScan	10:32:57	10:33:02	0.1	SenseRefScan	10:33:05	10:33:13	0.1	Confirmation	10:33:15	10:34:20	1.1	CoilSurveyScan	10:47:20	10:47:25	0.1	SenseRefScan	10:47:28	10:47:36	0.1	Confirmation
2017	5	Breast	anterior	28.7	26.3	55.1	26.5	2.2	28.6	3.1	17.4	49.2	CoilSurveyScan	11:01:24	11:01:32	0.1	SenseRefScan	11:01:36	11:01:44	0.1	SmartBreast	11:01:47	11:02:37	0.8	STIR_TSE_tra	11:03:26	11:07:43	4.3	T2_TSE_cor	11:07:45	11:13:59	6.2	dyn_T1_2D_FFE_RL	11:15:05	11:22:37	7.5	T1_KM_THRIVE_HR_tra	11:22:40	11:25:54	3.2	T2_MVXD_Axilla	11:26:00	11:30:07	4.1
2017	8	Breast	sense_breast_7m_aci	36.7	26.3	63	34.3	2.4	28.7	4.3	6.3	47.3	CoilSurveyScan	13:57:34	13:57:42	0.1	SenseRefScan	13:57:45	13:57:54	0.1	SmartBreast	13:57:56	13:58:46	0.8	STIR_TSE_tra	13:59:46	14:03:30	3.7	T2_TSE_cor	14:03:33	14:07:22	3.8	Silicone_Only Achieva	14:07:47	14:12:31	4.7	Silicone_SUP Achieva	14:12:34	14:15:45	3.2	dyn_T1_2D_FFE_RL	14:16:23	14:23:40	7.3	T1_KM_THRIVE_HR_tra	14:23:43	14:26:57	3.2	T2_MVXD_Axilla
2017	5	Breast	anterior	33	29.4	62.4	31.4	1.6	31	0.4	9.9	43.3	CoilSurveyScan	11:57:45	11:57:53	0.1	SenseRefScan	11:57:57	11:58:06	0.1	SmartBreast	11:58:08	11:58:58	0.8	STIR_TSE_tra	11:59:25	12:03:10	3.8	T2_TSE_cor	12:03:13	12:07:03	3.8	Silicone_Only Achieva	12:07:19	12:12:00	4.7	Silicone_SUP Achieva	12:12:03	12:15:15	3.2	dyn_T1_2D_FFE_RL	12:15:40	12:23:09	7.5	T1_KM_THRIVE_HR_tra	12:23:12	12:26:26	3.2	T2_MVXD_Axilla
2017	2	Breast	sense_breast_7m_aci	25.5	29.9	55.4	22.8	2.7	32.5	9.4	16.5	51.4	CoilSurveyScan	08:40:25	08:40:33	0.1	SenseRefScan	08:40:37	08:40:45	0.1	SmartBreast	08:40:48	08:41:38	0.8	STIR_TSE_tra	08:42:51	08:46:36	3.7	T2_TSE_cor	08:46:39	08:50:28	3.8	dyn_T1_2D_FFE	08:51:17	08:58:08	6.9	T1_KM_THRIVE_HR_tra	08:58:11	09:01:22	3.2	T2_MVXD_Axilla	09:01:48	09:05:55	4.1
2017	7	Breast	posterior	35.7	30	65.7	33.3	2.4	32.4	9.5	17.4	62.7	CoilSurveyScan	13:59:06	13:59:14	0.1	SenseRefScan	13:59:18	13:59:27	0.1	SmartBreast	13:59:30	14:00:20	0.8	STIR_TSE_tra	14:01:24	14:05:41	4.3	T2_TSE_cor	14:05:44	14:10:14	4.5	Silicone_Only Achieva	14:10:32	14:15:13	4.7	Silicone_SUP Achieva	14:15:16	14:18:53	3.6	dyn_T1_2D_FFE_RL	14:19:36	14:27:19	7.7	T1_KM_THRIVE_HR_tra	14:27:21	14:30:41	3.3	T2_MVXD_Axilla
2017	5	Breast	sense_breast_7m_aci	20.9	31.3	52.2	19	1.9	33.2	0.4	7.8	29.1	CoilSurveyScan	10:14:55	10:15:03	0.1	SenseRefScan	10:15:06	10:15:15	0.1	SmartBreast	10:15:16	10:16:06	0.8	STIR_TSE_tra	10:17:10	10:20:55	3.7	dyn_T1_2D_FFE	10:21:19	10:28:15	6.9	T1_KM_THRIVE_HR_tra	10:28:18	10:31:29	3.2	T2_MVXD_Axilla	10:31:48	10:35:50	4
2017	4	Breast	nvc_base	27.2	32.6	59.8	24.4	2.8	35.4	6.7	32.2	66.1	CoilSurveyScan	09:45:22	09:45:30	0.1	SenseRefScan	09:45:35	09:45:44	0.1	SmartBreast	09:45:46	09:46:36	0.8	STIR_TSE_tra	09:48:06	09:51:51	3.8	T2_TSE_cor	09:52:19	09:56:09	3.8	dyn_T1_2D_FFE	09:56:27	10:04:22	7.9	T1_KM_THRIVE_HR_tra	10:04:25	10:08:04	3.7	T2_MVXD_Axilla	10:08:28	10:12:35	4.1
2017	9	Breast	nvc_base	41.6	33.5	75.1	9.3	32.3	65.8	11.3	32.3	85.2	CoilSurveyScan	14:05:46	14:05:55	0.1	SURVEY	14:05:59	14:06:25	0.4	SenseRefScan	14:07:43	14:07:52	0.2	dyn_T1W_FFE_3D	14:07:55	14:11:12	3.3	CoilSurveyScan	14:17:19	14:17:25	0.1	SenseRefScan	14:17:30	14:17:38	0.1	Confirmation	14:17:40	14:18:49	1.1	CoilSurveyScan	14:30:47	14:30:52	0.1	SenseRefScan	14:30:56	14:31:04	0.1	Confirmation
2017	7	Breast	sense_breast_7m_aci	25.2	33.9	59.2	23.2	2	35.9	8.6	23.9	57.7	CoilSurveyScan	15:27:13	15:27:21	0.1	SenseRefScan	15:27:25	15:27:33	0.1	SmartBreast	15:27:36	15:28:25	0.8	STIR_TSE_tra	15:29:17	15:33:01	3.7	T2_TSE_cor	15:33:04	15:36:53	3.8	dyn_T1_2D_FFE_RL	15:37:43	15:44:43	7	T1_KM_THRIVE_HR_tra	15:44:45	15:48:19	3.6	T2_MVXD_Axilla	15:48:24	15:52:26	4
2017	1	Breast	sense_ankle_8_aci	27.6	34.2	61.8	25	2.6	36.8	1.6	32.9	62.1	CoilSurveyScan	07:44:44	07:45:20	0.6	SenseRefScan	07:45:25	07:45:33	0.1	SmartBreast	07:45:36	07:46:26	0.8	STIR_TSE_tra	07:47:31	07:51:47	4.3	T2_TSE_cor	07:52:03	07:56:20	4.3	dyn_T1_2D_FFE_RL	07:56:55	08:03:54	7	T1_KM_THRIVE_HR_tra	08:04:08	08:07:27	3.3	CoilSurveyScan	08:07:34	08:07:39	0.1	SenseRefScan	08:07:45	08:07:53	0.1	T2_MVXD_Axilla
2017	3	Breast	sense_breast_7m_aci	22.3	34.8	57.1	19.7	2.6	37.4	11.7	24.5	58.5	CoilSurveyScan	09:34:04	09:34:11	0.1	SenseRefScan	09:34:15	09:34:24	0.1	SmartBreast	09:34:26	09:35:16	0.8	STIR_TSE_tra	09:36:43	09:40:59	4.3	dyn_T1_2D_FFE_RL	09:41:35	09:48:36	7	T1_KM_THRIVE_HR_tra	09:48:39	09:51:51	3.2	T2_MVXD_Axilla	09:52:15	09:56:22	4.1
2017	8	Breast	sense_shoulder8_dci	27.9	36	63.9	25.4	2.5	38.5	6.4	25.6	59.9	CoilSurveyScan	14:28:02	14:28:10	0.1	SenseRefScan	14:28:14	14:28:23	0.1	SmartBreast	14:28:25	14:29:15	0.8	STIR_TSE_tra	14:30:06	14:33:52	3.8	T2_TSE_cor	14:33:54	14:39:52	6	dyn_T1_2D_FFE	14:40:20	14:47:07	6.8	T1_KM_THRIVE_HR_tra	14:47:10	14:50:38	3.5	CoilSurveyScan	14:51:30	14:51:36	0.1	SenseRefScan	14:51:41	14:51:49	0.1	T2_MVXD_Axilla
2017	3	Breast	sense_small_extr_8_aci	27.5	37.1	64.6	25.4	2.1	39.1	0.3	30.5	58.3	CoilSurveyScan	10:03:25	10:03:33	0.1	SenseRefScan	10:03:38	10:03:46	0.1	SmartBreast	10:03:49	10:04:39	0.8	STIR_TSE_tra	10:05:37	10:09:53	4.3	T2_TSE_cor	10:09:56	10:15:36	5.7	dyn_T1_2D_FFE_RL	10:16:11	10:23:11	7	T1_KM_THRIVE_HR_tra	10:23:13	10:26:28	3.3	T2_MVXD_Axilla	10:26:48	10:30:55	4.1
2017	2	Breast	sense_ankle_8_aci	22.6	37.3	59.9	20.5	2.1	39.4	0.5	22	45.1	CoilSurveyScan	08:30:20	08:30:28	0.1	SenseRefScan	08:30:33	08:30:41	0.1	SmartBreast	08:30:44	08:31:34	0.8	STIR_TSE_tra	08:32:51	08:37:07	4.3	dyn_T1_2D_FFE_RL	08:37:39	08:45:16	7.6	T1_KM_THRIVE_HR_tra	08:45:18	08:48:48	3.5	T2_MVXD_Axilla	08:48:52	08:52:55	4
2017	6	Breast	nvc_base	21.1	37.7	58.8	19.1	2.1	39.7	0.3	17.3	38.7	CoilSurveyScan	12:07:41	12:07:49	0.1	SenseRefScan	12:07:54	12:08:03	0.1	SmartBreast	12:08:05	12:08:55	0.8	STIR_TSE_tra	12:09:52	12:13:37	3.8	dyn_T1_2D_FFE	12:14:18	12:21:04	6.8	T1_KM_THRIVE_HR_tra	12:21:06	12:24:26	3.3	T2_MVXD_Axilla	12:24:42	12:28:49	4.1
2017	7	Breast	anterior	30.7	38.8	69.4	28.3	2.3	41.1	14	34.9	79.6	CoilSurveyScan	14:05:52	14:06:00	0.1	SenseRefScan	14:06:05	14:06:14	0.1	SmartBreast	14:06:16	14:07:06	0.8	STIR_TSE_tra	14:07:59	14:12:15	4.3	T2_TSE_cor	14:12:18	14:16:48	4.5	dyn_T1_2D_FFE_RL	14:16:58	14:17:01	0	dyn_T1_2D_FFE_RL	14:17:15	14:24:57	7.7	T1_KM_THRIVE_HR_tra	14:25:17	14:28:32	3.3	T2_MVXD_Axilla	14:28:36	14:32:38	4	T1_KM_THRIVE_HR_tra
2017	7	Breast	anterior	25.4	39	64.4	23.1	2.3	41.3	7.9	38.6	71.9	CoilSurveyScan	13:19:43	13:19:52	0.1	SenseRefScan	13:19:56	13:20:05	0.1	SmartBreast	13:20:07	13:20:57	0.8	STIR_TSE_tra	13:21:30	13:25:15	3.8	T2_TSE_cor	13:25:18	13:29:34	4.3	dyn_T1_2D_FFE	13:30:31	13:37:13	6.7	T1_KM_THRIVE_HR_tra	13:37:16	13:40:25	3.1	T2_MVXD_Axilla	13:40:59	13:45:07	4.1
2017	3	Breast	anterior	25.4	72.9	98.3	23.7	1.7	74.6	6.6	67.2	99.1	CoilSurveyScan	09:35:16	09:35:24	0.1	SenseRefScan	09:35:29	09:35:37	0.1	SmartBreast	09:35:40	09:36:30	0.8	STIR_TSE_tra	09:37:17	09:41:02	3.8	T2_TSE_cor	09:41:05	09:45:21	4.3	dyn_T1_2D_FFE_RL	09:45:57	09:53:12	7.2	T1_KM_THRIVE_HR_tra	09:53:15	09:56:31	3.3	T2_MVXD_Axilla	09:56:35	10:00:38	4
2017	6	Breast	sense_breast_7m_aci	48.5	89.3	137.8	10.3	38.2	127.5	23.5	88.7	160.6	CoilSurveyScan	11:07:08	11:07:16	0.1	SURVEY	11:07:20	11:07:45	0.4	SenseRefScan	11:08:33	11:08:42	0.1	dyn_T1W_FFE_3D	11:08:44	11:12:01	3.3	CoilSurveyScan	11:20:24	11:20:30	0.1	SenseRefScan	11:20:34	11:20:43	0.1	Confirmation	11:20:45	11:21:53	1.1	CoilSurveyScan	11:34:41	11:34:46	0.1	SenseRefScan	11:34:50	11:34:58	0.1	Confirmation
2017	9	Breast	nvc_base	24.7	154.3	179	22.9	1.8	156.1	5.7	150.9	181.3	CoilSurveyScan	15:43:27	15:43:35	0.1	SenseRefScan	15:43:39	15:43:48	0.1	SmartBreast	15:43:50	15:44:40	0.8	STIR_TSE_tra	15:45:20	15:49:06	3.8	T2_TSE_cor	15:49:08	15:52:58	3.8	dyn_T1_2D_FFE	15:53:37	16:00:22	6.7	T1_KM_THRIVE_HR_tra	16:00:25	16:03:45	3.3	T2_MVXD_Axilla	16:04:02	16:08:09	4.1
2017	16	Knee	anterior	19.9	0	19.9	18.8	1.2	1.2	10.5	4	34.4	CoilSurveyScan	19:03:04	19:03:11	0.1	SenseRefScan	19:03:15	19:03:26	0.2	SURVEY_LEFT	19:03:29	19:03:50	0.3	T2_KB_TSE_sag	19:04:30	19:07:50	3.3	PD_FS_SPAIR_cor	19:08:03	19:11:13	3.2	PD_mDixon_tra	19:11:17	19:15:11	3.9	PD_FS_SPIR_sag	19:15:14	19:19:38	4.4	T1_TSE_cor	19:19:41	19:23:00	3.3
2017	11	Knee	sense_knee_16_aci	20.4	0	20.4	18.2	2.2	2.2	6.5	10.9	37.7	CoilSurveyScan	18:32:39	18:32:46	0.1	SenseRefScan	18:32:50	18:33:01	0.2	SURVEY_LEFT	18:33:03	18:33:24	0.3	T2_KB_TSE_sag	18:35:06	18:38:12	3.1	PD_FS_SPAIR_cor	18:38:17	18:41:27	3.2	PD_mDixon_tra	18:41:37	18:45:30	3.9	PD_FS_SPIR_sag	18:45:33	18:49:39	4.1	T1_TSE_cor	18:49:44	18:53:01	3.3
2017	16	Knee	posterior	20.6	0	20.6	19.4	1.2	1.2	0.2	10.8	31.6	CoilSurveyScan	19:00:45	19:00:53	0.1	SenseRefScan	19:00:57	19:01:08	0.2	SURVEY_LEFT	19:01:12	19:01:32	0.3	T2_KB_TSE_sag	19:02:17	19:05:23	3.1	PD_FS_SPAIR_cor	19:05:27	19:09:01	3.6	PD_mDixon_tra	19:09:13	19:13:06	3.9	PD_FS_SPIR_sag	19:13:09	19:17:33	4.4	T1_TSE_cor	19:17:36	19:21:21	3.7
2017	12	Knee	nvc_base	20.7	0	20.7	19.6	1.1	1.1	0.3	27.6	48.7	CoilSurveyScan	18:45:46	18:45:54	0.1	SenseRefScan	18:45:58	18:46:09	0.2	SURVEY_LEFT	18:46:12	18:46:33	0.3	T2_KB_TSE_sag	18:47:16	18:50:22	3.1	PD_FS_SPAIR_cor	18:50:27	18:54:02	3.6	PD_mDixon_tra	18:54:06	18:58:00	3.9	PD_FS_SPIR_sag	18:58:02	19:02:43	4.7	T1_TSE_cor	19:02:47	19:06:31	3.7
2017	12	Knee	posterior	23	0	23	21.4	1.5	1.5	0.2	7.9	31.1	CoilSurveyScan	18:17:34	18:17:41	0.1	SenseRefScan	18:17:46	18:17:57	0.2	SURVEY_LEFT	18:18:00	18:18:20	0.3	T2_KB_TSE_sag	18:19:03	18:22:09	3.1	PD_FS_SPAIR_cor	18:22:14	18:25:24	3.2	PD_mDixon_tra	18:25:51	18:29:45	3.9	3D_mFFE_Meniscus	18:29:47	18:32:58	3.2	PD_FS_SPIR_sag	18:33:01	18:37:08	4.1	T1_TSE_cor	18:37:13	18:40:32	3.3
2017	14	Knee	sense_knee_16_aci	23	0	23	21.8	1.2	1.2	3.4	12.1	38.5	CoilSurveyScan	18:56:45	18:56:51	0.1	SenseRefScan	18:56:56	18:57:07	0.2	SURVEY_LEFT	18:57:09	18:57:29	0.3	T2_KB_TSE_sag	18:57:58	19:01:17	3.3	PD_FS_SPAIR_cor	19:01:21	19:04:43	3.4	PD_mDixon_tra	19:05:07	19:08:27	3.3	3D_mFFE_Meniscus	19:08:30	19:11:44	3.2	PD_FS_SPIR_sag	19:11:47	19:16:10	4.4	T1_TSE_cor	19:16:13	19:19:43	3.5
2017	13	Knee	nvc_base	23	0	23	21.4	1.6	1.6	0.3	8.6	32	CoilSurveyScan	19:03:36	19:03:44	0.1	SenseRefScan	19:03:49	19:04:00	0.2	SURVEY_LEFT	19:04:02	19:04:22	0.3	T2_KB_TSE_sag	19:04:50	19:07:56	3.1	PD_FS_SPAIR_cor	19:08:16	19:11:27	3.2	PD_mDixon_tra	19:11:40	19:15:33	3.9	3D_mFFE_Meniscus	19:15:54	19:19:06	3.2	PD_FS_SPIR_sag	19:19:10	19:23:17	4.1	T1_TSE_cor	19:23:21	19:26:38	3.3
2017	16	Knee	sense_ankle_8_aci	23.2	0	23.2	21.7	1.5	1.5	0.2	11.3	34.7	CoilSurveyScan	18:15:20	18:15:27	0.1	SenseRefScan	18:15:31	18:15:42	0.2	SURVEY_RIGHT	18:15:45	18:16:06	0.3	T2_KB_TSE_sag	18:16:49	18:19:58	3.2	PD_FS_SPAIR_cor	18:20:13	18:23:23	3.2	PD_mDixon_tra	18:23:26	18:27:19	3.9	3D_mFFE_Meniscus	18:27:33	18:30:44	3.2	PD_FS_SPIR_sag	18:30:47	18:35:10	4.4	T1_TSE_cor	18:35:13	18:38:31	3.3
2017	11	Knee	anterior	23.8	0	23.8	21.9	1.8	1.8	3.8	8.2	35.8	CoilSurveyScan	18:13:34	18:13:41	0.1	SenseRefScan	18:13:46	18:13:57	0.2	SURVEY_LEFT	18:14:00	18:14:21	0.3	T2_KB_TSE_sag	18:15:04	18:18:24	3.3	PD_FS_SPAIR_cor	18:18:56	18:22:07	3.2	PD_mDixon_tra	18:22:11	18:26:05	3.9	3D_mFFE_Meniscus	18:26:20	18:29:31	3.2	PD_FS_SPIR_sag	18:29:34	18:33:58	4.4	T1_TSE_cor	18:34:01	18:37:20	3.3
2017	12	Knee	nvc_base	24.7	0	24.7	22.5	2.3	2.3	7.8	4.4	36.9	CoilSurveyScan	19:10:20	19:10:32	0.2	SenseRefScan	19:10:35	19:10:49	0.2	SURVEY_RIGHT	19:10:51	19:11:12	0.3	SURVEY_RIGHT	19:12:05	19:12:26	0.4	T2_KB_TSE_sag	19:12:45	19:15:51	3.1	PD_FS_SPAIR_cor	19:15:56	19:19:18	3.4	PD_mDixon_tra	19:19:41	19:23:24	3.7	3D_mFFE_Meniscus	19:23:49	19:27:02	3.2	PD_FS_SPIR_sag	19:27:06	19:31:29	4.4	T1_TSE_cor
2017	12	Knee	sense_breast_7m_aci	25.6	0	25.6	24.3	1.2	1.2	0.3	7	32.9	CoilSurveyScan	16:57:57	16:58:04	0.1	SenseRefScan	16:58:08	16:58:19	0.2	SURVEY_RIGHT	16:58:22	16:58:42	0.3	T2_KB_TSE_sag	16:59:17	17:02:23	3.1	PD_FS_SPAIR_cor	17:02:27	17:05:49	3.4	PD_mDixon_tra	17:05:53	17:09:46	3.9	PD_FS_SPIR_sag	17:10:02	17:14:08	4.1	T2_TSE_tra	17:14:13	17:19:57	5.7	T1_TSE_cor	17:20:01	17:23:31	3.5
2017	14	Knee	nvc_base	27.8	0	27.8	24.1	3.7	3.7	6.6	9.8	44.3	CoilSurveyScan	19:18:52	19:18:59	0.1	SenseRefScan	19:19:04	19:19:15	0.2	SURVEY_LEFT	19:19:18	19:19:39	0.3	SURVEY_LEFT	19:20:33	19:20:55	0.4	T2_KB_TSE_sag	19:21:50	19:25:24	3.6	PD_FS_SPAIR_cor	19:26:15	19:30:02	3.8	PD_mDixon_tra	19:30:07	19:34:02	3.9	3D_mFFE_Meniscus	19:34:22	19:37:37	3.3	PD_FS_SPIR_sag	19:37:40	19:41:47	4.1	T1_TSE_cor
2017	10	Knee	sense_breast_7m_aci	28.6	0	28.6	25.3	3.2	3.2	0.2	147.2	176	CoilSurveyScan	16:21:05	16:21:12	0.1	SenseRefScan	16:21:16	16:21:27	0.2	SURVEY_LEFT	16:21:29	16:21:50	0.3	CoilSurveyScan	16:22:51	16:22:55	0.1	SenseRefScan	16:23:00	16:23:10	0.2	SURVEY_LEFT	16:23:12	16:23:33	0.3	SURVEY_LEFT	16:24:13	16:24:35	0.4	T2_KB_TSE_sag	16:24:50	16:27:55	3.1	PD_FS_SPAIR_cor	16:28:00	16:31:10	3.2	PD_FS_SPAIR_cor
2017	4	Knee	anterior	30.5	0	30.5	25.1	5.3	5.3	0.2	8	38.7	CoilSurveyScan	17:40:31	17:40:39	0.1	SenseRefScan	17:40:43	17:40:54	0.2	SURVEY_LEFT	17:40:57	17:41:18	0.3	T2_KB_TSE_sag	17:42:29	17:46:07	3.6	PD_FS_SPAIR_cor	17:46:12	17:49:46	3.6	PD_mDixon_tra	17:53:14	17:57:08	3.9	3D_mFFE_Meniscus	17:57:11	18:00:23	3.2	PD_FS_SPIR_sag	18:00:47	18:05:44	5	T1_TSE_cor	18:05:47	18:11:01	5.2
2017	13	Knee	nvc_base	36.7	0	36.7	32.2	4.4	4.4	0.4	17	54.1	CoilSurveyScan	18:38:24	18:38:32	0.1	SenseRefScan	18:38:36	18:38:47	0.2	SURVEY_RIGHT	18:38:50	18:39:10	0.3	T2_KB_TSE_sag	18:40:00	18:43:33	3.6	PD_FS_SPAIR_cor	18:44:12	18:47:35	3.4	PD_FS_SPAIR_tra	18:47:55	18:52:29	4.6	T2_FFE_sag	18:52:34	18:56:05	3.5	PD_FS_SPIR_sag	18:56:08	19:01:06	5	T1_TSE_cor	19:01:11	19:04:55	3.7	T1_KM_FS_SPIR_sag
2017	12	Knee	sense_ankle_8_aci	24.2	3	27.2	21.7	2.5	5.5	0.2	2.7	27.1	CoilSurveyScan	17:14:09	17:14:16	0.1	SenseRefScan	17:14:21	17:14:31	0.2	SURVEY_RIGHT	17:14:35	17:14:55	0.3	CoilSurveyScan	17:15:57	17:16:02	0.1	SenseRefScan	17:16:05	17:16:16	0.2	SURVEY_RIGHT	17:16:18	17:16:38	0.3	T2_KB_TSE_sag	17:17:24	17:20:30	3.1	PD_FS_SPAIR_cor	17:20:34	17:23:44	3.2	PD_mDixon_tra	17:24:03	17:27:21	3.3	3D_mFFE_Meniscus
2017	12	Knee	nvc_base	18	5.1	23.1	16.9	1.1	6.2	0.3	0.3	18.6	CoilSurveyScan	16:45:13	16:45:21	0.1	SenseRefScan	16:45:25	16:45:36	0.2	SURVEY_LEFT	16:45:40	16:46:01	0.3	T2_KB_TSE_sag	16:46:44	16:49:50	3.1	PD_FS_SPAIR_cor	16:49:55	16:52:42	2.8	PD_mDixon_tra	16:52:46	16:56:04	3.3	PD_FS_SPIR_sag	16:56:07	17:00:11	4.1	T1_TSE_cor	17:00:14	17:03:14	3
2017	11	Knee	posterior	24.7	5.2	30	23.4	1.3	6.6	2.6	0.3	27.7	CoilSurveyScan	14:50:56	14:51:03	0.1	SenseRefScan	14:51:08	14:51:19	0.2	SURVEY_LEFT	14:51:22	14:51:43	0.3	T2_KB_TSE_sag	14:52:25	14:55:44	3.3	PD_FS_SPAIR_cor	14:55:49	14:58:59	3.2	PD_mDixon_tra	14:59:04	15:02:57	3.9	PD_FS_SPIR_sag	15:03:01	15:07:36	4.6	T2_TSE_tra	15:07:49	15:12:18	4.5	T1_TSE_cor	15:12:22	15:15:40	3.3
2017	12	Knee	anterior	23.2	5.5	28.8	21.5	1.8	7.3	5	5.2	33.5	CoilSurveyScan	17:19:39	17:19:47	0.1	SenseRefScan	17:19:51	17:20:02	0.2	SURVEY_LEFT	17:20:05	17:20:26	0.3	T2_KB_TSE_sag	17:21:04	17:24:10	3.1	PD_FS_SPAIR_cor	17:24:15	17:27:26	3.2	PD_mDixon_tra	17:27:43	17:31:37	3.9	3D_mFFE_Meniscus	17:32:09	17:35:22	3.2	PD_FS_SPIR_sag	17:35:25	17:39:32	4.1	T1_TSE_cor	17:39:35	17:42:53	3.3
2017	14	Knee	nvc_base	22.8	5.6	28.4	21.1	1.7	7.4	3.9	5.4	32.1	CoilSurveyScan	17:43:57	17:44:04	0.1	SenseRefScan	17:44:09	17:44:20	0.2	SURVEY_RIGHT	17:44:23	17:44:44	0.3	T2_KB_TSE_sag	17:45:32	17:48:38	3.1	PD_FS_SPAIR_cor	17:48:42	17:51:53	3.2	PD_mDixon_tra	17:52:27	17:55:59	3.5	3D_mFFE_Meniscus	17:56:01	17:59:13	3.2	PD_FS_SPIR_sag	17:59:16	18:03:23	4.1	T1_TSE_cor	18:03:28	18:06:46	3.3
2017	13	Knee	sense_knee_16_aci	26.4	5.8	32.2	24.3	2.2	8	0.2	5.6	32.2	CoilSurveyScan	17:41:19	17:41:25	0.1	SenseRefScan	17:41:29	17:41:40	0.2	SURVEY_LEFT	17:41:42	17:42:03	0.3	T2_KB_TSE_sag	17:43:18	17:46:24	3.1	PD_FS_SPAIR_cor	17:46:29	17:49:38	3.2	PD_mDixon_tra	17:49:42	17:52:59	3.3	3D_mFFE_Meniscus	17:53:01	17:53:13	0.2	PD_mDixon_tra	17:53:41	17:57:00	3.3	3D_mFFE_Meniscus	17:57:02	18:00:14	3.2	PD_FS_SPIR_sag
2017	1	Knee	nvc_base	27.9	5.8	33.7	24.4	3.5	9.3	3.7	5.5	37.1	CoilSurveyScan	07:34:04	07:34:34	0.5	SenseRefScan	07:34:38	07:34:47	0.1	SURVEY_LEFT	07:34:50	07:35:10	0.3	CoilSurveyScan	07:36:06	07:36:13	0.1	SenseRefScan	07:36:18	07:36:29	0.2	SURVEY_LEFT	07:36:32	07:36:53	0.3	T2_KB_TSE_sag	07:38:20	07:41:46	3.4	PD_FS_SPAIR_cor	07:42:22	07:45:58	3.6	PD_mDixon_tra	07:46:03	07:50:07	4.1	3D_mFFE_Meniscus
2017	2	Knee	posterior	46.4	6	52.5	41.8	4.7	10.7	9.8	5.4	61.6	CoilSurveyScan	08:12:30	08:12:37	0.1	SenseRefScan	08:12:41	08:12:52	0.2	SURVEY_LEFT	08:12:55	08:13:16	0.3	T1_TSE_tra	08:13:59	08:16:59	3	T2_TSE_tra	08:17:02	08:22:11	5.1	STIR_longTE_sag	08:22:13	08:29:03	6.8	T1_TSE_cor	08:29:06	08:32:48	3.7	STIR_longTE_cor	08:32:52	08:38:13	5.4	CoilSurveyScan	08:38:55	08:39:00	0.1	CoilSurveyScan
2017	14	Knee	anterior	24	6.5	30.6	22.1	2	8.5	4.1	6.3	34.5	CoilSurveyScan	17:12:51	17:12:59	0.1	SenseRefScan	17:13:03	17:13:14	0.2	SURVEY_RIGHT	17:13:17	17:13:38	0.3	T2_KB_TSE_sag	17:14:28	17:17:55	3.4	PD_FS_SPAIR_cor	17:18:07	17:21:18	3.2	PD_mDixon_tra	17:21:32	17:25:25	3.9	3D_mFFE_Meniscus	17:25:28	17:28:40	3.2	PD_FS_SPIR_sag	17:29:08	17:33:32	4.4	T1_TSE_cor	17:33:35	17:36:53	3.3
2017	10	Knee	nvc_base	24.9	6.6	31.4	23.1	1.8	8.3	8.2	1	34	CoilSurveyScan	15:46:01	15:46:12	0.2	SenseRefScan	15:46:17	15:46:30	0.2	SURVEY_LEFT	15:46:32	15:46:53	0.3	T2_KB_TSE_sag	15:47:41	15:50:48	3.1	PD_FS_SPAIR_cor	15:51:15	15:54:27	3.2	PD_mDixon_tra	15:54:31	15:58:24	3.9	PD_FS_SPIR_sag	15:58:27	16:02:34	4.1	T2_TSE_tra	16:02:46	16:07:33	4.8	T1_TSE_cor	16:07:36	16:10:54	3.3
2017	5	Knee	anterior	21.2	6.7	27.9	19.3	2	8.7	4.3	6.4	31.9	CoilSurveyScan	10:11:13	10:11:21	0.1	SenseRefScan	10:11:25	10:11:36	0.2	SURVEY_RIGHT	10:11:39	10:12:00	0.3	T2_KB_TSE_sag	10:13:00	10:16:33	3.6	PD_FS_SPAIR_cor	10:17:13	10:20:24	3.2	PD_mDixon_tra	10:20:29	10:24:22	3.9	PD_FS_SPIR_sag	10:24:25	10:29:06	4.7	T1_TSE_cor	10:29:09	10:32:27	3.3
2017	4	Knee	sense_knee_16_aci	25.4	6.7	32.2	23.9	1.6	8.3	1.4	0.9	27.8	CoilSurveyScan	10:38:42	10:38:54	0.2	SenseRefScan	10:38:59	10:39:12	0.2	SURVEY_RIGHT	10:39:15	10:39:36	0.3	T2_KB_TSE_sag	10:40:25	10:43:31	3.1	PD_FS_SPAIR_cor	10:43:35	10:46:45	3.2	PD_mDixon_tra	10:47:09	10:51:03	3.9	3D_mFFE_Meniscus	10:51:05	10:54:18	3.2	PD_FS_SPIR_sag	10:54:22	11:00:48	6.4	T1_TSE_cor	11:00:52	11:04:09	3.3
2017	3	Knee	sense_small_extr_8_aci	23.9	6.8	30.7	22.8	1.1	7.9	7	0.4	31.3	CoilSurveyScan	09:07:42	09:07:50	0.1	SenseRefScan	09:07:54	09:08:05	0.2	SURVEY_RIGHT	09:08:08	09:08:28	0.3	T2_KB_TSE_sag	09:09:06	09:12:26	3.3	PD_FS_SPAIR_cor	09:12:30	09:15:40	3.2	PD_mDixon_tra	09:15:47	09:19:40	3.9	3D_mFFE_Meniscus	09:19:42	09:23:37	3.9	PD_FS_SPIR_sag	09:23:40	09:28:04	4.4	T1_TSE_cor	09:28:07	09:31:39	3.5
2017	7	Knee	nvc_base	29.2	6.9	36.2	26.2	3.1	10	4.7	1	34.9	CoilSurveyScan	12:25:50	12:25:57	0.1	SenseRefScan	12:26:02	12:26:13	0.2	SURVEY_RIGHT	12:26:16	12:26:36	0.3	T2_KB_TSE_sag	12:27:14	12:30:20	3.1	PD_FS_SPAIR_cor	12:30:25	12:33:35	3.2	PD_mDixon_tra	12:33:49	12:37:43	3.9	PD_FS_SPIR_sag	12:37:45	12:41:52	4.1	T1_mDIXON_TSE_COR	12:41:56	12:46:01	4.1	T1_mDIXON_TSE_COR	12:46:03	12:50:08	4.1	T1_Arthro_FS_SPIR_sag
2017	1	Knee	posterior	31.1	6.9	37.9	28.1	3	9.9	5.4	0.4	36.9	CoilSurveyScan	07:37:26	07:38:01	0.6	SenseRefScan	07:38:05	07:38:16	0.2	SURVEY_LEFT	07:38:18	07:38:39	0.3	CoilSurveyScan	07:40:03	07:40:08	0.1	SenseRefScan	07:40:12	07:40:22	0.2	SURVEY_LEFT	07:40:25	07:40:46	0.3	T2_KB_TSE_sag	07:41:35	07:45:02	3.4	PD_FS_SPAIR_cor	07:45:06	07:48:16	3.2	PD_mDixon_tra	07:48:30	07:52:23	3.9	PD_FS_SPIR_sag
2017	11	Knee	sense_knee_16_aci	23.3	7	30.3	21.5	1.8	8.8	4.9	3.7	31.9	CoilSurveyScan	17:35:59	17:36:10	0.2	SenseRefScan	17:36:13	17:36:26	0.2	SURVEY_RIGHT	17:36:29	17:36:50	0.3	T2_KB_TSE_sag	17:37:32	17:40:37	3.1	PD_FS_SPAIR_cor	17:40:41	17:43:51	3.2	PD_mDixon_tra	17:44:13	17:48:06	3.9	3D_mFFE_Meniscus	17:48:09	17:51:20	3.2	PD_FS_SPIR_sag	17:51:45	17:55:52	4.1	T1_TSE_cor	17:55:57	17:59:15	3.3
2017	1	Knee	nvc_base	28	7.3	35.3	25.8	2.2	9.5	6.7	3.7	38.4	CoilSurveyScan	07:44:55	07:45:30	0.6	SenseRefScan	07:45:35	07:45:46	0.2	SURVEY_RIGHT	07:45:49	07:46:10	0.3	T2_KB_TSE_sag	07:47:08	07:50:15	3.1	PD_FS_SPAIR_cor	07:50:38	07:53:49	3.2	PD_mDixon_tra	07:53:52	07:57:45	3.9	3D_mFFE_Meniscus	07:57:47	08:00:58	3.2	PD_FS_SPIR_sag	08:01:28	08:05:36	4.1	PD_mDixon_tra	08:05:41	08:09:34	3.9	T1_TSE_cor
2017	14	Knee	nvc_base	22.3	7.4	29.7	21.1	1.2	8.6	0.4	1.1	23.7	CoilSurveyScan	17:57:06	17:57:13	0.1	SenseRefScan	17:57:18	17:57:29	0.2	SURVEY_LEFT	17:57:32	17:57:53	0.3	T2_KB_TSE_sag	17:58:26	18:01:33	3.1	PD_FS_SPAIR_cor	18:01:37	18:04:48	3.2	PD_mDixon_tra	18:05:03	18:08:34	3.5	3D_mFFE_Meniscus	18:08:36	18:11:48	3.2	PD_FS_SPIR_sag	18:11:51	18:15:58	4.1	T1_TSE_cor	18:16:03	18:19:21	3.3
2017	14	Knee	sense_small_extr_8_aci	23.9	7.5	31.4	21.8	2	9.5	0.7	0.7	25.2	CoilSurveyScan	18:35:45	18:35:52	0.1	SenseRefScan	18:35:57	18:36:07	0.2	SURVEY_RIGHT	18:36:11	18:36:31	0.3	T2_KB_TSE_sag	18:37:18	18:40:24	3.1	PD_FS_SPAIR_cor	18:41:02	18:44:24	3.4	PD_mDixon_tra	18:44:43	18:48:36	3.9	3D_mFFE_Meniscus	18:48:38	18:51:51	3.2	PD_FS_SPIR_sag	18:51:55	18:56:01	4.1	T1_TSE_cor	18:56:06	18:59:37	3.5
2017	10	Knee	posterior	23.2	7.6	30.8	21.3	1.9	9.5	0.4	7	30.6	CoilSurveyScan	15:52:11	15:52:22	0.2	SenseRefScan	15:52:27	15:52:40	0.2	SURVEY_LEFT	15:52:43	15:53:04	0.3	T2_KB_TSE_sag	15:54:01	15:57:07	3.1	PD_FS_SPAIR_cor	15:57:10	16:00:21	3.2	PD_mDixon_tra	16:00:57	16:04:29	3.5	3D_mFFE_Meniscus	16:04:32	16:07:48	3.3	PD_FS_SPIR_sag	16:07:51	16:11:58	4.1	T1_TSE_cor	16:12:03	16:15:21	3.3
2017	3	Knee	sense_breast_7m_aci	35	7.7	42.7	32	3	10.7	0.2	0.6	35.7	CoilSurveyScan	09:14:53	09:15:00	0.1	SenseRefScan	09:15:04	09:15:15	0.2	SURVEY_RIGHT	09:15:18	09:15:39	0.3	T2_KB_TSE_sag	09:16:03	09:19:22	3.3	PD_FS_SPAIR_cor	09:19:27	09:19:33	0.1	CoilSurveyScan	09:20:05	09:20:09	0.1	SenseRefScan	09:20:13	09:20:23	0.2	PD_FS_SPAIR_cor	09:20:26	09:23:37	3.2	PD_FS_SPAIR_tra	09:23:46	09:27:36	3.8	T2_FFE_sag
2017	16	Knee	anterior	27	7.9	35	24.2	2.8	10.7	0.2	0.4	27.6	CoilSurveyScan	18:43:22	18:43:29	0.1	SenseRefScan	18:43:33	18:43:44	0.2	SURVEY_LEFT	18:43:47	18:44:08	0.3	T2_KB_TSE_sag	18:45:05	18:48:11	3.1	PD_FS_SPAIR_cor	18:49:12	18:53:11	4	PD_mDixon_tra	18:53:15	18:57:09	3.9	PD_FS_SPIR_sag	18:57:22	19:01:30	4.1	T1_TSE_cor	19:01:34	19:06:02	4.5	PD_FS_SPIR_sag	19:06:22	19:10:25	4
2017	13	Knee	sense_knee_16_aci	22.9	8.1	31	21.4	1.5	9.6	0.3	7.7	30.9	CoilSurveyScan	17:48:24	17:48:31	0.1	SenseRefScan	17:48:35	17:48:46	0.2	SURVEY_RIGHT	17:48:48	17:49:08	0.3	T2_KB_TSE_sag	17:49:48	17:52:53	3.1	PD_FS_SPAIR_cor	17:53:14	17:56:25	3.2	PD_mDixon_tra	17:56:27	18:00:20	3.9	3D_mFFE_Meniscus	18:00:35	18:03:48	3.2	PD_FS_SPIR_sag	18:03:50	18:07:57	4.1	T1_TSE_cor	18:08:02	18:11:19	3.3
2017	13	Knee	posterior	25.7	8.2	33.8	23.3	2.4	10.5	0.2	8	33.8	CoilSurveyScan	18:36:54	18:37:02	0.1	SenseRefScan	18:37:06	18:37:17	0.2	SURVEY_LEFT	18:37:20	18:37:41	0.3	T2_KB_TSE_sag	18:38:45	18:42:05	3.3	PD_mDixon_tra	18:42:50	18:46:44	3.9	PD_mDixon_sag	18:46:48	18:50:06	3.3	T2_TSE_tra	18:50:09	18:54:38	4.5	SenseRefScan	18:54:51	18:55:30	0.6	T1_TSE_cor_MARS_VAT	18:55:33	18:59:11	3.6	PD_mDixon_cor
2017	1	Knee	anterior	20.2	8.6	28.8	18.8	1.4	10	7.5	8.4	36.1	CoilSurveyScan	09:20:31	09:21:07	0.6	SenseRefScan	09:21:13	09:21:24	0.2	SURVEY_RIGHT	09:21:27	09:21:48	0.3	T2_KB_TSE_sag	09:22:34	09:25:45	3.2	PD_FS_SPAIR_cor	09:26:02	09:29:13	3.2	PD_mDixon_tra	09:29:18	09:33:11	3.9	PD_FS_SPIR_sag	09:33:14	09:37:22	4.1	T1_TSE_cor	09:37:26	09:40:44	3.3
2017	13	Knee	anterior	26.9	8.9	35.8	25.4	1.5	10.4	0.3	0.6	27.9	CoilSurveyScan	17:16:20	17:16:28	0.1	SenseRefScan	17:16:32	17:16:43	0.2	SURVEY_RIGHT	17:16:46	17:17:07	0.3	T2_KB_TSE_sag	17:17:53	17:21:03	3.2	PD_FS_SPAIR_cor	17:21:07	17:24:18	3.2	PD_mDixon_tra	17:24:20	17:28:14	3.9	3D_mFFE_Meniscus	17:28:17	17:31:28	3.2	PD_FS_SPIR_sag	17:31:31	17:35:38	4.1	T1_TSE_cor	17:36:02	17:39:20	3.3	PD_mDixon_tra
2017	10	Knee	nvc_base	19.4	9	28.4	18.3	1.1	10.1	3.6	2.4	25.4	CoilSurveyScan	18:04:16	18:04:24	0.1	SenseRefScan	18:04:28	18:04:39	0.2	SURVEY_RIGHT	18:04:41	18:05:02	0.3	T2_KB_TSE_sag	18:05:34	18:08:41	3.1	PD_FS_SPAIR_cor	18:08:46	18:11:56	3.2	PD_mDixon_tra	18:12:14	18:16:07	3.9	PD_FS_SPIR_sag	18:16:10	18:20:17	4.1	T1_TSE_cor	18:20:22	18:23:40	3.3
2017	1	Knee	anterior	37	9.1	46.1	29	8	17.2	8.1	0.5	45.6	CoilSurveyScan	07:31:07	07:31:38	0.5	SenseRefScan	07:31:42	07:31:53	0.2	SURVEY_LEFT	07:31:56	07:32:17	0.3	CoilSurveyScan	07:32:56	07:33:01	0.1	SURVEY_LEFT	07:33:04	07:33:25	0.3	T2_KB_TSE_sag	07:35:02	07:38:55	3.9	PD_FS_SPAIR_cor	07:39:00	07:42:22	3.4	PD_mDixon_tra	07:42:38	07:46:32	3.9	PD_FS_SPIR_sag	07:46:35	07:51:32	5	T1_TSE_cor
2017	5	Knee	posterior	31.3	9.2	40.5	28.2	3.2	12.4	0.3	1.3	32.9	CoilSurveyScan	12:28:05	12:28:13	0.1	SenseRefScan	12:28:17	12:28:27	0.2	SURVEY_RIGHT	12:28:30	12:28:50	0.3	T2_KB_TSE_sag	12:30:45	12:34:04	3.3	PD_FS_SPAIR_cor	12:34:09	12:37:19	3.2	PD_mDixon_tra	12:37:30	12:41:23	3.9	PD_FS_SPIR_sag	12:41:26	12:45:50	4.4	T2_TSE_tra	12:45:53	12:50:21	4.5	T1_mDIXON_TSE_COR	12:51:06	12:55:18	4.2	T1_mDIXON_TSE_COR
2017	11	Knee	sense_knee_16_aci	23.5	9.4	32.9	21.9	1.6	11	5.6	4.3	33.4	CoilSurveyScan	16:17:27	16:17:34	0.1	SenseRefScan	16:17:38	16:17:49	0.2	SURVEY_LEFT	16:17:52	16:18:13	0.3	T2_KB_TSE_sag	16:18:52	16:21:57	3.1	PD_FS_SPAIR_cor	16:22:22	16:25:32	3.2	PD_mDixon_tra	16:25:35	16:29:27	3.9	3D_mFFE_Meniscus	16:29:43	16:32:55	3.2	PD_FS_SPIR_sag	16:32:57	16:37:21	4.4	T1_TSE_cor	16:37:25	16:40:56	3.5
2017	10	Knee	sense_breast_7m_aci	31.2	9.8	41	27.8	3.4	13.2	1.1	4.6	37	CoilSurveyScan	15:20:51	15:20:58	0.1	SenseRefScan	15:21:02	15:21:13	0.2	SURVEY_LEFT	15:21:16	15:21:37	0.3	T1_TSE_cor	15:22:31	15:27:07	4.6	STIR_longTE_cor	15:27:10	15:32:01	4.9	T2_TSE_sag	15:32:04	15:35:50	3.8	PD_FS_SPAIR_cor	15:35:54	15:40:03	4.2	T1_mDIXON_TSE_TRA	15:41:13	15:41:17	0.1	T1_mDIXON_TSE_TRA	15:42:21	15:48:20	6	T1_KM_FS_SPIR_sag
2017	9	Knee	anterior	23.3	10.5	33.9	21.4	1.9	12.5	3.7	0.4	27.5	CoilSurveyScan	16:19:20	16:19:28	0.1	SenseRefScan	16:19:32	16:19:43	0.2	SURVEY_RIGHT	16:19:46	16:20:07	0.3	T2_KB_TSE_sag	16:20:49	16:23:55	3.1	PD_FS_SPAIR_cor	16:24:00	16:27:10	3.2	PD_mDixon_tra	16:28:02	16:31:56	3.9	3D_mFFE_Meniscus	16:31:58	16:35:09	3.2	PD_FS_SPIR_sag	16:35:11	16:39:19	4.1	T1_TSE_cor	16:39:22	16:42:40	3.3
2017	1	Knee	nvc_base	19.9	11.4	31.3	18.7	1.1	12.5	4.4	6	30.2	CoilSurveyScan	07:35:43	07:36:18	0.6	SenseRefScan	07:36:22	07:36:36	0.2	SURVEY_LEFT	07:36:39	07:36:59	0.3	T2_KB_TSE_sag	07:37:38	07:40:44	3.1	PD_FS_SPAIR_cor	07:40:48	07:43:59	3.2	PD_mDixon_tra	07:44:09	07:48:02	3.9	PD_FS_SPIR_sag	07:48:06	07:52:13	4.1	T1_TSE_cor	07:52:17	07:55:35	3.3
2017	1	Knee	sense_knee_16_aci	23.6	12.2	35.8	22.1	1.5	13.7	6	4.7	34.3	CoilSurveyScan	07:38:17	07:38:52	0.6	SenseRefScan	07:38:56	07:39:07	0.2	SURVEY_RIGHT	07:39:10	07:39:30	0.3	T2_KB_TSE_sag	07:40:27	07:43:32	3.1	PD_FS_SPAIR_cor	07:43:36	07:46:46	3.2	PD_mDixon_tra	07:46:59	07:50:52	3.9	3D_mFFE_Meniscus	07:50:55	07:54:05	3.2	PD_FS_SPIR_sag	07:54:08	07:58:32	4.4	T1_TSE_cor	07:58:36	08:01:53	3.3
2017	3	Knee	sense_small_extr_8_aci	13.3	13.2	26.6	12	1.4	14.6	3.1	6.4	22.9	CoilSurveyScan	10:36:49	10:36:56	0.1	SenseRefScan	10:37:00	10:37:11	0.2	SURVEY_RIGHT	10:37:14	10:37:34	0.3	T1_KM_FS_SPIR_sag	10:38:43	10:41:45	3	T1_KM_mDIXON_TSE_COR	10:41:48	10:46:17	4.5	T1_KM_mDIXON_TSE_TRA	10:46:20	10:50:09	3.8
2017	13	Knee	nvc_base	27	13.4	40.4	26	1	14.4	0.3	10	37.2	CoilSurveyScan	18:16:20	18:16:27	0.1	SenseRefScan	18:16:31	18:16:42	0.2	SURVEY_LEFT	18:16:45	18:17:06	0.3	T2_KB_TSE_sag	18:17:36	18:20:47	3.2	PD_FS_SPAIR_cor	18:20:51	18:24:01	3.2	PD_mDixon_tra	18:24:05	18:27:58	3.9	3D_mFFE_Meniscus	18:28:01	18:31:12	3.2	PD_FS_SPIR_sag	18:31:16	18:35:23	4.1	T2_TSE_tra	18:35:27	18:39:56	4.5	T1_TSE_cor
2017	1	Knee	posterior	23.3	14.3	37.7	21.8	1.5	15.9	3.4	2.3	29.1	CoilSurveyScan	07:32:11	07:32:42	0.5	SenseRefScan	07:32:47	07:32:59	0.2	SURVEY_RIGHT	07:33:01	07:33:21	0.3	T2_KB_TSE_sag	07:34:08	07:37:14	3.1	PD_FS_SPAIR_cor	07:37:18	07:40:29	3.2	PD_mDixon_tra	07:40:51	07:44:44	3.9	3D_mFFE_Meniscus	07:44:47	07:47:59	3.2	PD_FS_SPIR_sag	07:48:02	07:52:09	4.1	T1_TSE_cor	07:52:14	07:55:32	3.3
2017	9	Knee	nvc_base	36.3	16.9	53.2	32.3	4	20.9	5.6	7.1	48.9	CoilSurveyScan	15:13:58	15:14:05	0.1	SenseRefScan	15:14:09	15:14:20	0.2	SURVEY_LEFT	15:14:24	15:14:45	0.3	T2_KB_TSE_sag	15:15:30	15:18:49	3.3	PD_FS_SPAIR_cor	15:18:54	15:22:04	3.2	PD_FS_SPAIR_tra	15:22:09	15:26:13	4.1	T2_FFE_sag	15:26:18	15:29:30	3.2	PD_FS_SPIR_sag	15:29:35	15:33:42	4.1	T1_TSE_cor	15:33:46	15:37:05	3.3	SenseRefScan
2017	10	Knee	nvc_base	23.2	17.7	40.9	21.4	1.8	19.5	5.1	12.7	41.1	CoilSurveyScan	16:55:03	16:55:10	0.1	SenseRefScan	16:55:14	16:55:25	0.2	SURVEY_LEFT	16:55:28	16:55:49	0.3	T2_KB_TSE_sag	16:56:44	16:59:50	3.1	PD_FS_SPAIR_cor	17:00:06	17:03:17	3.2	PD_mDixon_tra	17:03:22	17:07:15	3.9	3D_mFFE_Meniscus	17:07:32	17:10:45	3.2	PD_FS_SPIR_sag	17:10:48	17:14:55	4.1	T1_TSE_cor	17:15:00	17:18:18	3.3
2017	3	Knee	sense_ankle_8_aci	24.4	18.7	43.1	23.1	1.2	20	9	3.9	37.3	CoilSurveyScan	09:09:56	09:10:07	0.2	SenseRefScan	09:10:12	09:10:25	0.2	SURVEY_LEFT	09:10:28	09:10:48	0.3	T2_KB_TSE_sag	09:11:33	09:14:57	3.4	PD_FS_SPAIR_cor	09:15:01	09:18:46	3.8	PD_mDixon_tra	09:18:54	09:22:25	3.5	3D_mFFE_Meniscus	09:22:27	09:25:38	3.2	PD_FS_SPIR_sag	09:25:41	09:29:48	4.1	T1_TSE_cor	09:29:53	09:34:18	4.4
2017	3	Knee	posterior	19.1	19.1	38.2	18.2	0.9	20	1.6	14.9	35.6	CoilSurveyScan	08:56:52	08:56:59	0.1	SenseRefScan	08:57:04	08:57:15	0.2	SURVEY_LEFT	08:57:16	08:57:37	0.3	T2_KB_TSE_sag	08:58:09	09:01:15	3.1	PD_FS_SPAIR_cor	09:01:19	09:04:29	3.2	PD_mDixon_tra	09:04:34	09:08:28	3.9	PD_FS_SPIR_sag	09:08:30	09:12:37	4.1	T1_TSE_cor	09:12:41	09:16:00	3.3
2017	13	Knee	posterior	24.3	19.1	43.4	22	2.3	21.4	5	10.5	39.8	CoilSurveyScan	17:34:26	17:34:37	0.2	SenseRefScan	17:34:41	17:34:54	0.2	SURVEY_LEFT	17:34:57	17:35:18	0.3	T2_KB_TSE_sag	17:36:17	17:39:23	3.1	PD_FS_SPAIR_cor	17:39:46	17:42:57	3.2	PD_mDixon_tra	17:43:27	17:47:42	4.3	3D_mFFE_Meniscus	17:47:56	17:51:10	3.2	PD_FS_SPIR_sag	17:51:13	17:55:20	4.1	T1_TSE_cor	17:55:24	17:58:42	3.3
2017	5	Knee	sense_knee_16_aci	60.5	20	80.5	40.9	19.6	39.6	5.7	19.7	86	CoilSurveyScan	11:10:52	11:11:00	0.1	SenseRefScan	11:11:04	11:11:13	0.1	SURVEY_LEFT	11:11:16	11:11:37	0.3	T2_KB_TSE_sag	11:12:39	11:15:52	3.2	PD_FS_SPAIR_cor	11:15:56	11:19:06	3.2	PD_mDixon_tra	11:19:14	11:23:10	3.9	3D_mFFE_Meniscus	11:23:13	11:23:38	0.4	3D_mFFE_Meniscus	11:23:43	11:26:54	3.2	PD_FS_SPIR_sag	11:27:10	11:32:41	5.5	T1_TSE_cor
2017	1	Knee	nvc_base	24.9	20.4	45.3	22.9	2	22.4	5.3	6.6	36.8	CoilSurveyScan	07:32:07	07:32:42	0.6	SenseRefScan	07:32:46	07:33:00	0.2	SURVEY_LEFT	07:33:03	07:33:23	0.3	T2_KB_TSE_sag	07:34:09	07:37:28	3.3	PD_FS_SPAIR_cor	07:37:33	07:40:55	3.4	PD_mDixon_tra	07:41:44	07:45:38	3.9	3D_mFFE_Meniscus	07:45:40	07:48:53	3.2	PD_FS_SPIR_sag	07:48:56	07:53:20	4.4	T1_TSE_cor	07:53:31	07:57:02	3.5
2017	4	Knee	anterior	34.7	25.8	60.4	30.3	4.4	30.2	12	13.6	60.2	CoilSurveyScan	10:26:05	10:26:12	0.1	SenseRefScan	10:26:16	10:26:27	0.2	SURVEY_LEFT	10:26:30	10:26:51	0.3	SenseRefScan	10:27:12	10:27:23	0.2	SURVEY_LEFT	10:27:26	10:27:47	0.3	T1_TSE_tra	10:29:27	10:33:41	4.2	T2_TSE_tra	10:33:43	10:38:03	4.3	STIR_longTE_cor	10:38:07	10:42:37	4.5	T1_TSE_sag	10:42:50	10:46:30	3.7	2D_BOLUSTRAK
2017	13	Knee	posterior	23	35.9	59	21.2	1.9	37.8	11.2	31.9	66.2	CoilSurveyScan	17:59:19	17:59:30	0.2	SenseRefScan	17:59:35	17:59:48	0.2	SURVEY_LEFT	17:59:51	18:00:11	0.3	T2_KB_TSE_sag	18:01:06	18:04:12	3.1	PD_FS_SPAIR_cor	18:04:16	18:07:14	3	PD_mDixon_tra	18:07:40	18:11:35	3.9	3D_mFFE_Meniscus	18:11:49	18:15:01	3.2	PD_FS_SPIR_sag	18:15:05	18:19:12	4.1	T1_TSE_cor	18:19:16	18:22:22	3.1
2017	8	Knee	posterior	19.5	36.3	55.8	18.2	1.3	37.6	2.5	36	58	CoilSurveyScan	14:33:40	14:33:47	0.1	SenseRefScan	14:33:51	14:34:02	0.2	SURVEY_RIGHT	14:34:05	14:34:26	0.3	T2_KB_TSE_sag	14:35:13	14:38:19	3.1	PD_FS_SPAIR_cor	14:38:24	14:41:33	3.2	PD_mDixon_tra	14:41:44	14:45:37	3.9	PD_FS_SPIR_sag	14:45:40	14:49:46	4.1	T1_TSE_cor	14:49:51	14:53:08	3.3
2017	1	Knee	nvc_base	24.9	37	61.9	22.4	2.5	39.4	6	18.8	49.7	CoilSurveyScan	07:31:43	07:32:14	0.5	SenseRefScan	07:32:18	07:32:29	0.2	SURVEY_RIGHT	07:32:32	07:32:53	0.3	CoilSurveyScan	07:33:33	07:33:37	0.1	SenseRefScan	07:33:41	07:33:52	0.2	SURVEY_RIGHT	07:33:55	07:34:16	0.3	T2_KB_TSE_sag	07:35:31	07:38:38	3.1	PD_FS_SPAIR_cor	07:38:42	07:41:52	3.2	PD_mDixon_tra	07:41:56	07:45:50	3.9	3D_mFFE_Meniscus
2017	1	Knee	nvc_base	24.2	38.5	62.6	22.3	1.9	40.4	3.3	31.9	59.3	CoilSurveyScan	07:33:26	07:34:01	0.6	SenseRefScan	07:34:06	07:34:17	0.2	SURVEY_RIGHT	07:34:20	07:34:41	0.3	T2_KB_TSE_sag	07:35:29	07:38:36	3.1	PD_FS_SPAIR_cor	07:38:40	07:41:51	3.2	PD_mDixon_tra	07:42:21	07:46:15	3.9	3D_mFFE_Meniscus	07:46:30	07:49:46	3.3	PD_FS_SPIR_sag	07:49:50	07:54:14	4.4	T1_TSE_cor	07:54:18	07:57:36	3.3
2017	6	Knee	anterior	28.2	41.9	70	25.1	3.1	44.9	0.4	2.2	30.7	CoilSurveyScan	12:49:54	12:50:01	0.1	SenseRefScan	12:50:05	12:50:16	0.2	SURVEY_RIGHT	12:50:19	12:50:40	0.3	T2_KB_TSE_sag	12:52:03	12:55:49	3.8	T2_KB_TSE_sag	12:56:35	13:00:14	3.7	PD_FS_SPAIR_cor	13:00:19	13:04:17	4	PD_mDixon_tra	13:04:34	13:08:28	3.9	PD_FS_SPIR_sag	13:08:51	13:13:32	4.7	T1_TSE_cor	13:13:36	13:18:03	4.5
2017	7	Knee	sense_ankle_8_aci	33.8	56.1	89.9	26.7	7.1	63.2	0.7	37	71.5	CoilSurveyScan	12:02:09	12:02:16	0.1	SenseRefScan	12:02:21	12:02:29	0.1	SURVEY_FullFOV_Transversal	12:02:32	12:02:41	0.1	SURVEY_LEFT	12:02:43	12:02:53	0.2	SURVEY_LEFT	12:03:18	12:03:39	0.4	SURVEY_LEFT	12:04:13	12:04:34	0.4	T2_KB_TSE_sag	12:05:46	12:08:14	2.5	PD_mDixon_tra	12:09:13	12:12:48	3.6	PD_mDixon_sag	12:12:51	12:15:21	2.5	PD_mDixon_cor
2017	13	Knee	sense_knee_16_aci	23.9	58.2	82.1	22.7	1.2	59.4	4.8	51.1	79.7	CoilSurveyScan	17:08:19	17:08:26	0.1	SenseRefScan	17:08:30	17:08:41	0.2	SURVEY_RIGHT	17:08:44	17:09:05	0.3	T2_KB_TSE_sag	17:09:35	17:12:41	3.1	PD_FS_SPAIR_cor	17:12:45	17:15:55	3.2	PD_mDixon_tra	17:16:14	17:20:07	3.9	PD_FS_SPIR_sag	17:20:10	17:24:17	4.1	T2_TSE_tra	17:24:22	17:28:52	4.5	T1_TSE_cor	17:28:57	17:32:14	3.3
2017	14	Knee	nvc_base	22.7	95.1	117.7	21.4	1.3	96.3	6.6	5.2	34.5	CoilSurveyScan	18:20:16	18:20:24	0.1	SenseRefScan	18:20:28	18:20:39	0.2	SURVEY_LEFT	18:20:42	18:21:03	0.3	T2_KB_TSE_sag	18:21:45	18:24:51	3.1	PD_FS_SPAIR_cor	18:24:56	18:28:06	3.2	PD_mDixon_tra	18:28:18	18:32:11	3.9	3D_mFFE_Meniscus	18:32:14	18:35:26	3.2	PD_FS_SPIR_sag	18:35:28	18:39:35	4.1	T1_TSE_cor	18:39:39	18:42:57	3.3
2017	13	Knee	sense_breast_7m_aci	19.5	229.6	249	18.2	1.3	230.8	4.6	229.3	253.3	CoilSurveyScan	15:39:44	15:39:52	0.1	SenseRefScan	15:39:55	15:40:06	0.2	SURVEY_RIGHT	15:40:09	15:40:29	0.3	T2_KB_TSE_sag	15:41:10	15:44:15	3.1	PD_FS_SPAIR_cor	15:44:20	15:47:30	3.2	PD_mDixon_tra	15:47:46	15:51:40	3.9	PD_FS_SPIR_sag	15:51:43	15:55:50	4.1	T1_TSE_cor	15:55:55	15:59:12	3.3
2017	14	Lumbar spine	sense_ankle_8_aci	20.4	0	20.4	19.3	1.1	1.1	0.2	11.1	31.7	CoilSurveyScan	18:01:14	18:01:21	0.1	SURVEY	18:01:26	18:01:56	0.5	CoilSurveyScan	18:02:40	18:02:44	0.1	SenseRefScan	18:02:47	18:02:56	0.1	T2_TSE_sag	18:02:58	18:07:15	4.3	T2_SPIR_sag	18:07:18	18:10:46	3.5	T2_TSE_cor	18:10:49	18:13:26	2.6	T1_TSE_sag	18:13:29	18:16:39	3.2	T2_TSE_DRIVE_HR_tra	18:16:42	18:21:37	4.9
2017	16	Lumbar spine	nvc_base	21	0	21	19	1.9	1.9	0.2	21.5	42.6	CoilSurveyScan	17:36:41	17:36:48	0.1	SURVEY	17:36:52	17:37:23	0.5	SenseRefScan	17:39:00	17:39:09	0.1	T2_TSE_sag	17:39:12	17:43:26	4.2	T2_SPIR_sag	17:43:29	17:46:53	3.4	T2_TSE_cor	17:46:56	17:49:34	2.6	T1_TSE_sag	17:49:36	17:52:42	3.1	T2_TSE_DRIVE_HR_tra	17:52:45	17:57:41	4.9
2017	14	Lumbar spine	sense_knee_16_aci	23.2	0	23.2	22.4	0.8	0.8	8.2	19.9	51.3	CoilSurveyScan	17:52:08	17:52:15	0.1	SURVEY	17:52:19	17:52:49	0.5	CoilSurveyScan	17:53:12	17:53:17	0.1	SenseRefScan	17:53:20	17:53:28	0.1	T2_TSE_sag	17:53:31	17:57:48	4.3	T2_SPIR_sag	17:57:50	18:01:19	3.5	T2_TSE_cor	18:01:21	18:03:59	2.6	T1_TSE_sag	18:04:01	18:07:12	3.2	T2_TSE_DRIVE_HR_tra	18:07:15	18:11:42	4.5	T1_TSE_tra
2017	10	Lumbar spine	posterior	24.4	0	24.4	23.2	1.2	1.2	0.2	7.4	31.9	CoilSurveyScan	16:48:28	16:48:34	0.1	SURVEY	16:48:39	16:49:09	0.5	CoilSurveyScan	16:49:45	16:49:49	0.1	SenseRefScan	16:49:53	16:50:01	0.1	T2_TSE_sag	16:50:03	16:54:19	4.3	T2_TSE_cor	16:54:23	16:57:00	2.6	T2_SPIR_sag	16:57:03	17:00:32	3.5	T1_TSE_sag	17:00:43	17:03:53	3.2	T2_TSE_DRIVE_HR_tra	17:03:57	17:08:52	4.9	T1_TSE_tra
2017	15	Lumbar spine	sense_knee_16_aci	26	0	26	24.4	1.6	1.6	6.8	7.1	39.9	CoilSurveyScan	19:07:06	19:07:13	0.1	SURVEY	19:07:18	19:07:48	0.5	SenseRefScan	19:08:29	19:08:38	0.1	T2_TSE_sag	19:08:41	19:12:55	4.2	T2_SPIR_sag	19:12:58	19:16:27	3.5	CoilSurveyScan	19:16:47	19:16:51	0.1	SenseRefScan	19:16:55	19:17:04	0.1	T2_TSE_cor	19:17:06	19:19:48	2.7	T1_TSE_sag	19:19:50	19:23:01	3.2	T2_TSE_DRIVE_HR_tra
2017	12	Lumbar spine	nvc_base	26.1	0	26.1	24.4	1.7	1.7	0.2	8.3	34.7	CoilSurveyScan	18:57:11	18:57:13	0	CoilSurveyScan	18:57:22	18:57:28	0.1	SURVEY	18:57:33	18:58:03	0.5	CoilSurveyScan	18:58:53	18:58:57	0.1	SenseRefScan	18:59:01	18:59:09	0.1	T2_TSE_sag	18:59:12	19:04:01	4.8	T2_SPIR_sag	19:04:22	19:08:18	3.9	T2_TSE_cor	19:08:21	19:10:58	2.6	T1_TSE_sag	19:11:01	19:14:35	3.6	T2_TSE_DRIVE_HR_tra
2017	14	Lumbar spine	sense_knee_16_aci	27.2	0	27.2	25.4	1.8	1.8	4	6.7	37.9	CoilSurveyScan	18:58:16	18:58:23	0.1	SURVEY	18:58:28	18:58:58	0.5	CoilSurveyScan	18:59:49	18:59:54	0.1	SenseRefScan	18:59:57	19:00:05	0.1	T2_TSE_sag	19:00:08	19:04:58	4.8	T2_SPIR_sag	19:05:01	19:08:56	3.9	T2_TSE_cor	19:08:58	19:11:56	3	T1_TSE_sag	19:12:24	19:15:58	3.6	T2_TSE_DRIVE_HR_tra	19:16:09	19:21:04	4.9	T1_TSE_tra
2017	14	Lumbar spine	nvc_base	28.2	0	28.2	27.1	1.1	1.1	2.9	9	40.1	CoilSurveyScan	18:28:28	18:28:35	0.1	SURVEY	18:28:39	18:29:09	0.5	CoilSurveyScan	18:29:41	18:29:45	0.1	SenseRefScan	18:29:49	18:29:58	0.1	T2_TSE_sag	18:30:00	18:34:17	4.3	T2_SPIR_sag	18:34:19	18:37:48	3.5	3D_Spine_VIEW_T2W	18:38:02	18:44:34	6.5	T1_TSE_sag	18:44:37	18:47:47	3.2	T2_TSE_DRIVE_HR_tra	18:47:50	18:52:45	4.9	T1_TSE_tra
2017	12	Lumbar spine	nvc_base	28.2	0	28.2	27	1.2	1.2	2.7	7.9	38.9	CoilSurveyScan	18:47:34	18:47:41	0.1	SURVEY	18:47:45	18:48:15	0.5	CoilSurveyScan	18:49:05	18:49:09	0.1	SenseRefScan	18:49:13	18:49:21	0.1	T2_TSE_sag	18:49:24	18:53:40	4.3	T2_SPIR_sag	18:53:43	18:57:12	3.5	T2_TSE_cor	18:57:14	18:59:52	2.6	T1_TSE_sag	18:59:54	19:03:05	3.2	T2_TSE_DRIVE_HR_tra	19:03:07	19:08:03	4.9	T1_TSE_tra
2017	13	Lumbar spine	posterior	28.6	0	28.6	27.1	1.6	1.6	5	7	40.7	CoilSurveyScan	18:53:43	18:53:50	0.1	SURVEY	18:53:55	18:54:25	0.5	SenseRefScan	18:55:10	18:55:19	0.1	T2_TSE_sag	18:55:22	18:59:36	4.2	T2_SPIR_sag	18:59:39	19:03:07	3.5	CoilSurveyScan	19:03:21	19:03:24	0.1	3D_Spine_VIEW_T2W	19:03:29	19:10:00	6.5	T1_TSE_sag	19:10:03	19:13:13	3.2	T2_TSE_DRIVE_HR_tra	19:13:29	19:18:25	4.9	T1_TSE_tra
2017	12	Lumbar spine	sense_ankle_8_aci	41.7	0	41.7	32.9	8.8	8.8	1.5	9.2	52.4	CoilSurveyScan	18:17:02	18:17:09	0.1	SURVEY	18:17:13	18:17:43	0.5	SenseRefScan	18:18:11	18:18:20	0.1	T2_TSE_sag	18:18:23	18:22:37	4.2	T2_SPIR_sag	18:22:40	18:26:04	3.4	T2_TSE_cor	18:26:06	18:28:43	2.6	T1_TSE_sag	18:28:46	18:31:52	3.1	T2_TSE_DRIVE_HR_tra	18:31:55	18:36:50	4.9	T1_TSE_tra	18:37:14	18:41:09	3.9	T1_KM_FS_SPIR_sag
2017	11	Lumbar spine	nvc_base	43.2	0	43.2	39.1	4.2	4.2	0.3	6.1	49.6	CoilSurveyScan	18:40:04	18:40:10	0.1	SURVEY	18:40:15	18:40:45	0.5	SURVEY	18:41:46	18:42:16	0.5	CoilSurveyScan	18:42:57	18:43:02	0.1	SenseRefScan	18:43:05	18:43:14	0.1	T2_TSE_sag	18:43:16	18:48:06	4.8	T2_SPIR_sag	18:48:10	18:48:19	0.2	T2_SPIR_sag	18:48:50	18:52:40	3.8	T2_TSE_cor	18:52:53	18:53:00	0.1	T2_TSE_cor
2017	13	Lumbar spine	nvc_base	43.8	0	43.8	38.1	5.7	5.7	4	12.5	60.3	CoilSurveyScan	19:37:16	19:37:23	0.1	SURVEY	19:37:27	19:37:58	0.5	SenseRefScan	19:38:56	19:39:29	0.6	T2_TSE_sag	19:39:32	19:47:12	7.7	STIR_longTE_sag	19:48:39	19:55:05	6.4	CoilSurveyScan	19:55:06	19:55:10	0.1	3D_Spine_VIEW_T2W	19:55:14	20:01:47	6.5	CoilSurveyScan	20:03:02	20:03:05	0.1	SenseRefScan	20:03:10	20:03:33	0.4	T1_TSE_sag
2017	14	Lumbar spine	sense_knee_16_aci	45.3	0	45.3	39.7	5.6	5.6	0.2	6.3	51.7	CoilSurveyScan	19:10:44	19:10:51	0.1	SURVEY	19:10:55	19:11:25	0.5	CoilSurveyScan	19:12:06	19:12:13	0.1	SURVEY	19:12:17	19:12:47	0.5	CoilSurveyScan	19:13:37	19:13:42	0.1	SenseRefScan	19:13:46	19:13:55	0.1	T2_TSE_sag	19:13:57	19:18:47	4.8	T2_SPIR_sag	19:18:50	19:22:40	3.8	T2_TSE_cor	19:22:43	19:25:20	2.6	T1_TSE_sag
2017	4	Lumbar spine	sense_knee_16_aci	25.2	3.1	28.3	23.2	2	5.1	14.8	2.9	42.9	CoilSurveyScan	09:53:02	09:53:09	0.1	SURVEY	09:53:13	09:53:44	0.5	CoilSurveyScan	09:54:25	09:54:29	0.1	SenseRefScan	09:54:34	09:54:42	0.1	T2_TSE_sag	09:54:44	09:59:01	4.3	T2_SPIR_sag	09:59:16	10:02:45	3.5	T2_TSE_cor	10:02:47	10:05:24	2.6	T1_TSE_sag	10:05:55	10:09:06	3.2	T2_TSE_DRIVE_HR_tra	10:09:09	10:14:04	4.9	T1_TSE_tra
2017	10	Lumbar spine	sense_small_extr_8_aci	21.8	3.6	25.4	19.4	2.4	6	5.2	2.6	29.6	CoilSurveyScan	13:59:05	13:59:12	0.1	SURVEY	13:59:17	13:59:47	0.5	CoilSurveyScan	14:00:49	14:00:53	0.1	SenseRefScan	14:00:58	14:01:06	0.1	T2_TSE_sag	14:01:09	14:05:26	4.3	T2_SPIR_sag	14:05:50	14:09:15	3.4	T2_TSE_cor	14:09:17	14:11:54	2.6	T1_TSE_sag	14:11:57	14:15:04	3.1	T2_TSE_DRIVE_HR_tra	14:15:42	14:20:52	5.2
2017	12	Lumbar spine	nvc_base	26.6	3.6	30.2	24.4	2.2	5.8	0.4	3.4	30.3	CoilSurveyScan	17:47:08	17:47:15	0.1	SURVEY	17:47:20	17:47:50	0.5	CoilSurveyScan	17:49:20	17:49:24	0.1	SenseRefScan	17:49:29	17:49:37	0.1	T2_TSE_sag	17:49:40	17:54:30	4.8	T2_SPIR_sag	17:54:39	17:58:34	3.9	T2_TSE_cor	17:58:37	18:01:15	2.6	T1_TSE_sag	18:01:24	18:04:59	3.6	T2_TSE_DRIVE_HR_tra	18:05:02	18:09:30	4.5	SenseRefScan
2017	11	Lumbar spine	nvc_base	37.2	3.6	40.7	34.6	2.5	6.1	0.2	3.3	40.7	CoilSurveyScan	17:04:02	17:04:09	0.1	SenseRefScan	17:04:15	17:04:23	0.1	Survey	17:04:26	17:05:21	0.9	Survey	17:05:58	17:06:45	0.8	CoilSurveyScan	17:07:20	17:07:25	0.1	SenseRefScan	17:07:29	17:07:57	0.5	T2_TSE_sag	17:08:00	17:13:33	5.5	STIR_longTE_sag	17:13:48	17:19:28	5.7	CoilSurveyScan	17:19:31	17:19:37	0.1	SenseRefScan
2017	5	Lumbar spine	anterior	10.9	3.9	14.7	9.9	0.9	4.8	0.7	0.4	12	CoilSurveyScan	10:10:40	10:10:47	0.1	SURVEY	10:10:51	10:11:21	0.5	SenseRefScan	10:12:03	10:12:12	0.1	T1_TSE_sag	10:12:15	10:15:23	3.1	SenseRefScan	10:15:26	10:15:50	0.4	STIR_longTE_sag	10:15:52	10:21:32	5.7
2017	10	Lumbar spine	nvc_base	34.8	4.5	39.4	30.7	4.1	8.6	4.4	1.3	40.6	CoilSurveyScan	14:37:19	14:37:25	0.1	SURVEY	14:37:29	14:37:59	0.5	CoilSurveyScan	14:39:45	14:39:49	0.1	SenseRefScan	14:39:54	14:40:02	0.1	T2_TSE_sag	14:40:04	14:45:28	5.4	3D_Spine_VIEW_T2W	14:46:19	14:52:52	6.6	T1_TSE_sag	14:53:25	14:57:23	4	STIR_longTE_sag	14:57:37	15:02:27	4.8	T2_TSE_DRIVE_HR_tra	15:02:45	15:07:13	4.5	T1_TSE_tra
2017	9	Lumbar spine	sense_small_extr_8_aci	20.3	4.7	25	19.2	1.1	5.8	5.2	4.6	30.1	CoilSurveyScan	16:23:26	16:23:33	0.1	SURVEY	16:23:37	16:24:07	0.5	SenseRefScan	16:24:44	16:24:53	0.1	T2_TSE_sag	16:24:55	16:29:10	4.2	T2_TSE_cor	16:29:12	16:31:50	2.6	T2_SPIR_sag	16:31:52	16:35:21	3.5	T1_TSE_sag	16:35:23	16:38:33	3.2	T2_TSE_DRIVE_HR_tra	16:38:47	16:43:43	4.9
2017	3	Lumbar spine	sense_knee_16_aci	24.8	4.8	29.6	23.1	1.7	6.4	0.6	4.4	29.8	CoilSurveyScan	09:04:58	09:05:05	0.1	SURVEY	09:05:09	09:05:40	0.5	SenseRefScan	09:06:51	09:07:00	0.1	T2_TSE_sag	09:07:03	09:11:17	4.2	T2_SPIR_sag	09:11:20	09:14:48	3.5	T2_TSE_cor	09:14:50	09:17:28	2.6	T1_TSE_sag	09:17:31	09:20:41	3.2	T2_TSE_DRIVE_HR_tra	09:20:45	09:25:40	4.9	T1_TSE_tra	09:25:50	09:29:45	3.9
2017	4	Lumbar spine	anterior	35.7	4.8	40.5	33.4	2.3	7.1	0.2	1.2	37.1	CoilSurveyScan	10:43:21	10:43:28	0.1	SURVEY	10:43:33	10:44:03	0.5	CoilSurveyScan	10:45:07	10:45:11	0.1	SenseRefScan	10:45:15	10:45:24	0.1	3D_Spine_VIEW_T2W	10:45:26	10:52:03	6.6	SenseRefScan	10:52:06	10:52:30	0.4	T2_TSE_sag	10:52:32	10:58:05	5.5	STIR_longTE_sag	10:58:33	11:04:13	5.7	T1_TSE_sag	11:04:16	11:10:05	5.8	T2_TSE_DRIVE_HR_tra
2017	3	Lumbar spine	anterior	20.9	4.9	25.7	19.3	1.6	6.4	0.3	0.6	21.7	CoilSurveyScan	09:10:53	09:11:00	0.1	SURVEY	09:11:04	09:11:19	0.3	CoilSurveyScan	09:11:28	09:11:34	0.1	SURVEY	09:11:38	09:12:09	0.5	CoilSurveyScan	09:12:36	09:12:41	0.1	SenseRefScan	09:12:45	09:12:54	0.1	T2_TSE_sag	09:12:56	09:17:13	4.3	T2_SPIR_sag	09:17:31	09:21:00	3.5	T2_TSE_cor	09:21:02	09:23:33	2.5	T1_TSE_sag
2017	1	Lumbar spine	anterior	24.9	5.2	30.1	23.4	1.5	6.7	0.5	0.8	26.1	CoilSurveyScan	07:36:01	07:36:31	0.5	SURVEY	07:36:36	07:37:06	0.5	CoilSurveyScan	07:37:52	07:37:57	0.1	SenseRefScan	07:38:01	07:38:09	0.1	T2_TSE_sag	07:38:12	07:42:29	4.3	T2_SPIR_sag	07:42:31	07:46:00	3.5	T2_TSE_cor	07:46:02	07:48:39	2.6	T1_TSE_sag	07:48:42	07:51:52	3.2	T2_TSE_DRIVE_HR_tra	07:52:15	07:56:57	4.7	T1_TSE_tra
2017	2	Lumbar spine	nvc_base	24.3	5.5	29.8	22.9	1.4	6.9	3	3.9	31.2	CoilSurveyScan	08:27:06	08:27:12	0.1	SURVEY	08:27:15	08:27:46	0.5	CoilSurveyScan	08:28:32	08:28:36	0.1	SenseRefScan	08:28:41	08:28:49	0.1	3D_Spine_VIEW_T2W	08:28:52	08:35:28	6.6	T2_SPIR_sag	08:35:31	08:39:00	3.5	T1_TSE_sag	08:39:02	08:42:12	3.2	T2_TSE_DRIVE_HR_tra	08:42:15	08:47:10	4.9	T1_TSE_tra	08:47:27	08:51:22	3.9
2017	9	Lumbar spine	sense_breast_7m_aci	74.9	5.5	80.4	67	7.9	13.4	0.2	5.2	80.3	CoilSurveyScan	15:16:12	15:16:19	0.1	SURVEY	15:16:24	15:16:55	0.5	CoilSurveyScan	15:17:35	15:17:40	0.1	SenseRefScan	15:17:44	15:17:53	0.1	T2_TSE_sag	15:17:56	15:22:13	4.3	T2_SPIR_sag	15:22:16	15:25:45	3.5	T2_TSE_cor	15:25:48	15:28:19	2.5	T1_TSE_sag	15:28:22	15:31:33	3.2	T2_TSE_DRIVE_HR_tra	15:31:36	15:36:32	4.9	T1_TSE_tra
2017	9	Lumbar spine	nvc_base	24.3	5.9	30.2	23	1.2	7.1	2.6	0.5	27.3	CoilSurveyScan	14:11:14	14:11:21	0.1	SURVEY	14:11:26	14:11:56	0.5	CoilSurveyScan	14:12:29	14:12:34	0.1	SenseRefScan	14:12:38	14:12:46	0.1	T2_TSE_sag	14:12:49	14:17:05	4.3	T2_SPIR_sag	14:17:08	14:20:37	3.5	T2_TSE_cor	14:20:40	14:23:17	2.6	T1_TSE_sag	14:23:20	14:26:30	3.2	T2_TSE_DRIVE_HR_tra	14:26:33	14:31:28	4.9	T1_TSE_tra
2017	9	Lumbar spine	anterior	25.7	6	31.7	24.2	1.5	7.6	4.7	5.6	36	CoilSurveyScan	15:20:26	15:20:33	0.1	SURVEY	15:20:37	15:21:07	0.5	SenseRefScan	15:21:44	15:21:53	0.1	T2_TSE_sag	15:21:56	15:26:44	4.8	T2_SPIR_sag	15:27:02	15:30:58	3.9	T2_TSE_cor	15:31:00	15:33:38	2.6	T1_TSE_sag	15:33:41	15:37:15	3.6	T2_TSE_DRIVE_HR_tra	15:37:18	15:42:13	4.9	T1_TSE_tra	15:42:33	15:46:08	3.6
2017	8	Lumbar spine	nvc_base	67.2	6.3	73.6	60.5	6.8	13.1	7.4	0.5	75.1	CoilSurveyScan	14:32:45	14:32:53	0.1	SURVEY	14:32:58	14:33:28	0.5	SenseRefScan	14:34:05	14:34:14	0.2	T2_TSE_sag	14:34:18	14:39:06	4.8	T2_SPIR_sag	14:39:09	14:43:05	3.9	T2_TSE_cor	14:43:21	14:46:00	2.6	T1_TSE_sag	14:46:02	14:49:32	3.5	T2_TSE_DRIVE_HR_tra	14:49:44	14:54:26	4.7	T1_TSE_tra	14:54:29	14:58:24	3.9	CoilSurveyScan
2017	6	Lumbar spine	nvc_base	36.8	6.4	43.2	34	2.8	9.2	4.2	6.1	47.1	CoilSurveyScan	13:31:00	13:31:07	0.1	SURVEY	13:31:11	13:31:42	0.5	SenseRefScan	13:32:16	13:32:25	0.1	T2_TSE_sag	13:32:27	13:37:36	5.1	T2_SPIR_sag	13:37:39	13:41:07	3.5	T2_TSE_cor	13:41:10	13:44:21	3.2	T1_TSE_sag	13:44:23	13:47:29	3.1	T1_TSE_tra	13:47:32	13:51:29	3.9	T2_TSE_DRIVE_HR_tra	13:51:38	13:56:34	4.9	T1_KM_mDixon_TSE_sag
2017	5	Lumbar spine	anterior	25	6.6	31.6	22.5	2.5	9.1	6.7	2	33.7	CoilSurveyScan	10:50:01	10:50:08	0.1	SURVEY	10:50:12	10:50:42	0.5	SenseRefScan	10:51:12	10:51:21	0.1	T2_TSE_sag	10:51:24	10:55:38	4.2	T2_SPIR_sag	10:56:54	11:00:23	3.5	T2_TSE_cor	11:00:26	11:03:04	2.6	T1_TSE_sag	11:03:33	11:06:40	3.1	T2_TSE_DRIVE_HR_tra	11:06:42	11:11:24	4.7	T1_TSE_tra	11:11:26	11:15:00	3.6
2017	16	Lumbar spine	nvc_base	25	7	32	23.5	1.6	8.5	3.4	6.5	35	CoilSurveyScan	18:49:14	18:49:21	0.1	SURVEY	18:49:26	18:49:56	0.5	CoilSurveyScan	18:50:47	18:50:52	0.1	SenseRefScan	18:50:56	18:51:05	0.1	T2_TSE_sag	18:51:07	18:55:24	4.3	T2_SPIR_sag	18:55:26	18:58:55	3.5	T2_TSE_cor	18:58:58	19:01:36	2.6	T1_TSE_sag	19:01:38	19:04:49	3.2	T2_TSE_DRIVE_HR_tra	19:04:52	19:09:48	4.9	SenseRefScan
2017	10	Lumbar spine	nvc_base	32.4	7.4	39.8	28.3	4.1	11.5	3.3	7.2	42.9	CoilSurveyScan	16:01:52	16:02:04	0.2	SURVEY	16:02:08	16:02:38	0.5	CoilSurveyScan	16:03:11	16:03:16	0.1	SenseRefScan	16:03:19	16:03:28	0.1	T2_TSE_sag	16:03:30	16:07:47	4.3	T2_SPIR_sag	16:07:50	16:08:06	0.3	CoilSurveyScan	16:09:59	16:10:06	0.1	SURVEY	16:10:10	16:10:41	0.5	CoilSurveyScan	16:11:24	16:11:29	0.1	SenseRefScan
2017	3	Lumbar spine	sense_small_extr_8_aci	27.2	7.7	34.9	25.1	2	9.8	4.2	7.5	38.8	CoilSurveyScan	08:53:12	08:53:19	0.1	SURVEY	08:53:24	08:53:54	0.5	CoilSurveyScan	08:54:20	08:54:24	0.1	SURVEY	08:54:27	08:54:58	0.5	SenseRefScan	08:55:42	08:55:51	0.1	T2_TSE_sag	08:55:54	09:00:44	4.8	T2_SPIR_sag	09:00:47	09:04:42	3.9	T2_TSE_DRIVE_HR_tra	09:04:55	09:09:51	4.9	T2_TSE_cor	09:09:53	09:12:30	2.6	T1_TSE_sag
2017	6	Lumbar spine	anterior	28.1	7.9	36	26.8	1.3	9.3	1.7	7.7	37.5	CoilSurveyScan	13:10:15	13:10:22	0.1	SURVEY	13:10:27	13:10:57	0.5	SURVEY	13:11:33	13:12:03	0.5	CoilSurveyScan	13:12:23	13:12:27	0.1	SenseRefScan	13:12:31	13:12:39	0.1	T2_TSE_sag	13:12:41	13:16:57	4.3	T2_SPIR_sag	13:17:00	13:20:29	3.5	T1_TSE_sag	13:20:31	13:23:36	3.1	T2_VISTA_sag	13:23:40	13:30:25	6.8	T2_TSE_DRIVE_HR_tra
2017	2	Lumbar spine	posterior	24.5	8.1	32.6	23.4	1.2	9.2	0.2	0.6	25.4	CoilSurveyScan	08:33:45	08:33:51	0.1	SURVEY	08:33:56	08:34:26	0.5	CoilSurveyScan	08:34:50	08:34:55	0.1	SURVEY	08:34:59	08:35:29	0.5	SenseRefScan	08:35:48	08:35:57	0.1	T2_TSE_sag	08:36:00	08:40:17	4.3	T2_SPIR_sag	08:40:20	08:43:44	3.4	T2_TSE_cor	08:43:47	08:46:43	2.9	T1_TSE_sag	08:46:46	08:49:52	3.1	T2_TSE_DRIVE_HR_tra
2017	1	Lumbar spine	nvc_base	39.1	8.1	47.2	37	2.1	10.2	5.9	1.2	46.1	CoilSurveyScan	07:35:26	07:35:56	0.5	SURVEY	07:36:01	07:36:31	0.5	CoilSurveyScan	07:37:38	07:37:43	0.1	SenseRefScan	07:37:46	07:38:14	0.5	T2_TSE_sag	07:38:16	07:43:49	5.5	STIR_longTE_sag	07:44:07	07:49:47	5.7	3D_Spine_VIEW_T2W	07:49:49	07:56:22	6.5	T1_TSE_sag	07:56:25	08:02:08	5.7	T2_TSE_DRIVE_HR_tra	08:02:12	08:07:06	4.9	T1_TSE_tra
2017	10	Lumbar spine	sense_ankle_8_aci	25.3	8.2	33.5	23.7	1.7	9.8	6.6	7.1	39	CoilSurveyScan	16:09:52	16:09:59	0.1	SURVEY	16:10:04	16:10:34	0.5	CoilSurveyScan	16:11:20	16:11:25	0.1	SenseRefScan	16:11:29	16:11:37	0.1	T2_TSE_sag	16:11:40	16:15:56	4.3	T2_SPIR_sag	16:15:59	16:16:06	0.1	T2_SPIR_sag	16:16:19	16:19:48	3.5	T2_TSE_cor	16:19:50	16:22:27	2.6	T1_TSE_sag	16:22:46	16:25:56	3.2	T2_TSE_DRIVE_HR_tra
2017	5	Lumbar spine	sense_breast_7m_aci	44.9	8.2	53.1	39.3	5.6	13.8	2.8	8	55.6	CoilSurveyScan	10:54:22	10:54:28	0.1	SenseRefScan	10:54:33	10:54:41	0.1	Survey	10:54:44	10:55:32	0.8	CoilSurveyScan	10:56:12	10:56:17	0.1	SenseRefScan	10:56:21	10:56:56	0.6	T2_TSE_sag	10:56:59	11:04:58	8	STIR_longTE_sag	11:05:05	11:11:45	6.7	3D_Spine_VIEW_T2W	11:11:48	11:11:49	0	CoilSurveyScan	11:14:23	11:14:27	0.1	SenseRefScan
2017	7	Lumbar spine	anterior	65.1	8.3	73.4	60	5.1	13.4	7.1	1.3	73.4	CoilSurveyScan	12:08:53	12:09:00	0.1	SURVEY	12:09:06	12:09:37	0.5	CoilSurveyScan	12:09:52	12:09:57	0.1	SURVEY	12:10:00	12:10:21	0.3	CoilSurveyScan	12:10:54	12:10:59	0.1	SenseRefScan	12:11:03	12:11:12	0.1	T2_TSE_sag	12:11:16	12:15:33	4.3	T2_SPIR_sag	12:15:36	12:19:05	3.5	T2_TSE_cor	12:19:08	12:21:46	2.6	T1_TSE_sag
2017	12	Lumbar spine	sense_breast_7m_aci	21	8.4	29.4	19.7	1.3	9.7	0.1	3.5	24.6	CoilSurveyScan	16:41:18	16:41:24	0.1	SURVEY	16:41:28	16:41:59	0.5	SenseRefScan	16:42:41	16:42:50	0.1	T2_TSE_sag	16:42:53	16:47:07	4.2	T2_SPIR_sag	16:47:10	16:50:34	3.4	T2_TSE_cor	16:50:37	16:53:14	2.6	T1_TSE_sag	16:53:32	16:56:39	3.1	T2_TSE_DRIVE_HR_tra	16:56:42	17:02:18	5.6
2017	4	Lumbar spine	posterior	29.6	8.4	38	26.6	3.1	11.5	4.3	7.4	41.3	CoilSurveyScan	09:36:37	09:36:44	0.1	SURVEY	09:36:48	09:37:04	0.3	CoilSurveyScan	09:37:23	09:37:29	0.1	SURVEY	09:37:34	09:38:04	0.5	CoilSurveyScan	09:39:03	09:39:07	0.1	SURVEY	09:39:11	09:39:41	0.5	SenseRefScan	09:40:38	09:40:47	0.1	T2_TSE_sag	09:40:49	09:46:13	5.4	T2_SPIR_sag	09:46:29	09:50:51	4.4	CoilSurveyScan
2017	12	Lumbar spine	sense_breast_7m_aci	35.4	8.7	44.1	31	4.4	13.1	0.6	8.5	44.4	CoilSurveyScan	16:34:43	16:34:49	0.1	SURVEY	16:34:54	16:35:24	0.5	CoilSurveyScan	16:36:03	16:36:07	0.1	SenseRefScan	16:36:11	16:36:19	0.1	T2_TSE_sag	16:36:22	16:40:38	4.3	T2_SPIR_sag	16:40:41	16:40:51	0.2	CoilSurveyScan	16:42:49	16:42:53	0.1	SenseRefScan	16:42:57	16:43:05	0.1	T2_SPIR_sag	16:43:07	16:46:26	3.3	T2_TSE_cor
2017	3	Lumbar spine	sense_breast_7m_aci	26.8	8.9	35.7	25.8	1	9.9	0.2	3.5	30.4	CoilSurveyScan	08:52:50	08:52:56	0.1	SURVEY	08:53:00	08:53:30	0.5	CoilSurveyScan	08:54:01	08:54:05	0.1	SenseRefScan	08:54:09	08:54:17	0.1	T2_TSE_sag	08:54:20	08:58:37	4.3	SenseRefScan	08:58:40	08:59:04	0.4	STIR_longTE_sag	08:59:06	09:04:46	5.7	CoilSurveyScan	09:04:46	09:04:50	0.1	3D_Spine_VIEW_T2W	09:04:54	09:11:27	6.5	T1_TSE_sag
2017	13	Lumbar spine	sense_ankle_8_aci	20.9	9.1	30	19.1	1.9	10.9	7.6	8.9	37.4	CoilSurveyScan	16:57:19	16:57:27	0.1	SURVEY	16:57:31	16:58:01	0.5	CoilSurveyScan	16:58:44	16:58:48	0.1	SenseRefScan	16:58:53	16:59:01	0.1	T2_TSE_sag	16:59:04	17:03:20	4.3	T2_SPIR_sag	17:03:23	17:06:52	3.5	T2_TSE_cor	17:06:54	17:09:31	2.6	T1_TSE_sag	17:10:19	17:13:30	3.2	T2_TSE_DRIVE_HR_tra	17:13:34	17:18:15	4.7
2017	1	Lumbar spine	sense_breast_7m_aci	28.2	9.2	37.5	25.7	2.5	11.8	4.4	8.9	41.5	CoilSurveyScan	07:38:15	07:38:45	0.5	SURVEY	07:38:50	07:39:20	0.5	SenseRefScan	07:41:04	07:41:13	0.1	T2_TSE_sag	07:41:15	07:46:03	4.8	T2_SPIR_sag	07:46:05	07:50:00	3.9	T2_TSE_cor	07:50:19	07:52:57	2.6	T1_TSE_sag	07:53:00	07:56:34	3.6	T2_TSE_DRIVE_HR_tra	07:56:37	08:01:32	4.9	T1_TSE_tra	08:01:46	08:06:30	4.7
2017	10	Lumbar spine	nvc_base	20.2	9.3	29.5	19.1	1.1	10.4	2.2	5.6	28	CoilSurveyScan	16:24:15	16:24:22	0.1	SURVEY	16:24:26	16:24:56	0.5	SenseRefScan	16:25:29	16:25:38	0.1	T2_TSE_sag	16:25:41	16:29:55	4.2	T2_SPIR_sag	16:29:58	16:33:22	3.4	T2_TSE_cor	16:33:42	16:36:20	2.6	T1_TSE_sag	16:36:22	16:39:28	3.1	T2_TSE_DRIVE_HR_tra	16:39:31	16:44:27	4.9
2017	8	Lumbar spine	sense_breast_7m_aci	40.8	9.3	50.1	34.9	5.9	15.2	3.7	9.1	53.6	CoilSurveyScan	16:04:30	16:04:36	0.1	SURVEY	16:04:41	16:05:11	0.5	CoilSurveyScan	16:06:11	16:06:16	0.1	SenseRefScan	16:06:20	16:06:28	0.1	T2_TSE_sag	16:06:31	16:10:47	4.3	T2_SPIR_sag	16:10:51	16:14:19	3.5	T2_TSE_cor	16:14:43	16:17:21	2.6	T1_TSE_sag	16:17:23	16:20:30	3.1	T2_TSE_DRIVE_HR_tra	16:21:22	16:26:04	4.7	T1_TSE_tra
2017	2	Lumbar spine	sense_ankle_8_aci	41.1	9.7	50.7	33.9	7.2	16.9	2.5	9.4	52.9	CoilSurveyScan	08:09:35	08:09:42	0.1	SURVEY	08:09:47	08:10:17	0.5	CoilSurveyScan	08:11:50	08:11:55	0.1	SenseRefScan	08:11:59	08:12:07	0.1	T2_TSE_sag	08:12:10	08:17:00	4.8	T2_SPIR_sag	08:17:03	08:20:58	3.9	T2_TSE_cor	08:21:12	08:23:49	2.6	T1_TSE_sag	08:23:52	08:27:25	3.6	T2_TSE_DRIVE_HR_tra	08:27:29	08:32:24	4.9	T1_TSE_tra
2017	1	Lumbar spine	sense_knee_16_aci	22.8	9.9	32.6	21.1	1.6	11.5	3.8	2.4	29	CoilSurveyScan	07:03:12	07:03:42	0.5	SURVEY	07:03:47	07:04:17	0.5	CoilSurveyScan	07:05:07	07:05:11	0.1	SenseRefScan	07:05:15	07:05:23	0.1	T2_TSE_sag	07:05:26	07:10:16	4.8	T2_SPIR_sag	07:10:19	07:14:09	3.8	SenseRefScan	07:14:31	07:14:40	0.1	T2_TSE_cor	07:14:42	07:17:21	2.7	T1_TSE_sag	07:17:26	07:20:57	3.5	T2_TSE_DRIVE_HR_tra
2017	11	Lumbar spine	nvc_base	23.4	9.9	33.3	21.2	2.2	12.1	0.5	6.9	30.7	CoilSurveyScan	16:35:21	16:35:33	0.2	SURVEY	16:35:37	16:36:14	0.6	SURVEY	16:37:37	16:38:08	0.5	CoilSurveyScan	16:38:30	16:38:35	0.1	SenseRefScan	16:38:38	16:38:47	0.1	T2_TSE_sag	16:38:50	16:43:45	4.9	T2_SPIR_sag	16:43:48	16:47:43	3.9	T2_TSE_cor	16:47:45	16:50:23	2.6	T1_TSE_sag	16:50:27	16:54:01	3.6	SenseRefScan
2017	11	Lumbar spine	posterior	41.3	10.4	51.7	37.1	4.2	14.6	0.2	10.2	51.8	CoilSurveyScan	16:58:13	16:58:19	0.1	SURVEY	16:58:24	16:58:54	0.5	CoilSurveyScan	16:59:33	16:59:38	0.1	SenseRefScan	16:59:41	16:59:49	0.1	T2_TSE_sag	16:59:52	17:04:09	4.3	T2_SPIR_sag	17:04:11	17:08:35	4.4	T1_TSE_sag	17:08:37	17:11:43	3.1	T2_SPIR_sag	17:11:53	17:12:28	0.6	T2W_mDixon_TSE	17:12:37	17:16:18	3.7	CoilSurveyScan
2017	8	Lumbar spine	nvc_base	69.2	10.5	79.8	60.7	8.5	19.1	8	6.6	83.8	CoilSurveyScan	13:05:26	13:05:33	0.1	SURVEY	13:05:39	13:06:09	0.5	CoilSurveyScan	13:07:42	13:07:47	0.1	SenseRefScan	13:07:51	13:07:59	0.1	T2_TSE_sag	13:08:03	13:12:20	4.3	3D_VIEW_PD	13:12:23	13:18:23	6	3D_VIEW_PD	13:19:17	13:19:18	0	DWIBS_b_0_800	13:20:54	13:27:48	6.9	T1_TSE_cor	13:27:52	13:32:40	4.8	STIR_COR
2017	2	Lumbar spine	nvc_base	45.1	10.7	55.8	39.1	6	16.7	0.3	5.6	51	CoilSurveyScan	08:19:35	08:19:41	0.1	SURVEY	08:19:46	08:20:16	0.5	CoilSurveyScan	08:22:12	08:22:16	0.1	SenseRefScan	08:22:20	08:22:29	0.1	T2_TSE_sag	08:22:32	08:27:21	4.8	T2_SPIR_sag	08:27:24	08:31:20	3.9	T2_TSE_cor	08:31:22	08:34:00	2.6	T2_SPIR_sag	08:34:39	08:38:21	3.7	T1_TSE_sag	08:38:40	08:42:14	3.6	T2_TSE_DRIVE_HR_tra
2017	14	Lumbar spine	sense_knee_16_aci	23.9	10.9	34.8	23	0.9	11.8	0.2	3.6	27.7	CoilSurveyScan	18:13:32	18:13:39	0.1	SURVEY	18:13:44	18:14:14	0.5	CoilSurveyScan	18:14:44	18:14:48	0.1	SenseRefScan	18:14:53	18:15:01	0.1	T2_TSE_sag	18:15:04	18:19:20	4.3	T2_SPIR_sag	18:19:23	18:22:52	3.5	T2_TSE_cor	18:22:54	18:25:31	2.6	T1_TSE_sag	18:25:34	18:28:44	3.2	T2_TSE_DRIVE_HR_tra	18:28:47	18:33:29	4.7	T1_TSE_tra
2017	11	Lumbar spine	nvc_base	20.2	11.1	31.3	19	1.2	12.3	4.6	0.6	25.4	CoilSurveyScan	17:15:03	17:15:10	0.1	SURVEY	17:15:14	17:15:45	0.5	CoilSurveyScan	17:16:34	17:16:39	0.1	SenseRefScan	17:16:43	17:16:52	0.1	T2_TSE_sag	17:16:54	17:21:11	4.3	T2_SPIR_sag	17:21:14	17:24:39	3.4	T2_TSE_cor	17:24:41	17:27:19	2.6	T1_TSE_sag	17:27:21	17:30:28	3.1	T2_TSE_DRIVE_HR_tra	17:30:31	17:35:13	4.7
2017	5	Lumbar spine	nvc_base	54.7	12	66.7	48.7	6	18	8	6	68.7	CoilSurveyScan	11:19:47	11:19:55	0.1	SURVEY	11:20:01	11:20:31	0.5	CoilSurveyScan	11:21:11	11:21:15	0.1	SenseRefScan	11:21:19	11:21:28	0.1	T2_TSE_sag	11:21:31	11:26:22	4.8	T2_SPIR_sag	11:26:25	11:30:21	3.9	T1_TSE_sag	11:30:25	11:33:54	3.5	T2_TSE_DRIVE_HR_tra	11:33:58	11:38:26	4.5	T1_TSE_tra	11:38:28	11:42:03	3.6	CoilSurveyScan
2017	11	Lumbar spine	anterior	27.3	12.1	39.5	25.5	1.8	13.9	4.8	0.5	32.6	CoilSurveyScan	16:31:00	16:31:07	0.1	SURVEY	16:31:11	16:31:41	0.5	SenseRefScan	16:32:28	16:32:37	0.1	T2_TSE_sag	16:32:40	16:37:28	4.8	T2_SPIR_sag	16:37:30	16:41:25	3.9	T2_TSE_cor	16:41:28	16:44:26	3	T1_TSE_sag	16:44:49	16:48:24	3.6	T2_TSE_DRIVE_HR_tra	16:48:32	16:53:41	5.2	T1_TSE_tra	16:54:00	16:58:21	4.3
2017	12	Lumbar spine	nvc_base	27.6	12.2	39.8	26.1	1.5	13.7	4.5	1	33.1	CoilSurveyScan	17:19:30	17:19:37	0.1	SURVEY	17:19:41	17:20:11	0.5	CoilSurveyScan	17:21:08	17:21:12	0.1	SenseRefScan	17:21:16	17:21:24	0.1	T2_TSE_sag	17:21:27	17:26:17	4.8	3D_Spine_VIEW_T2W	17:26:19	17:32:51	6.5	T2_TSE_DRIVE_HR_tra	17:32:54	17:35:57	3.1	T2_SPIR_sag	17:36:10	17:40:05	3.9	T1_TSE_sag	17:40:08	17:43:42	3.6	T1_TSE_tra
2017	3	Lumbar spine	anterior	22	12.9	34.9	19.8	2.1	15	6	0.5	28.5	CoilSurveyScan	09:05:43	09:05:50	0.1	SURVEY	09:05:54	09:06:12	0.3	CoilSurveyScan	09:06:24	09:06:30	0.1	SURVEY	09:06:34	09:07:04	0.5	CoilSurveyScan	09:08:10	09:08:15	0.1	SenseRefScan	09:08:18	09:08:27	0.1	T2_TSE_sag	09:08:30	09:12:46	4.3	T2_SPIR_sag	09:13:01	09:16:30	3.5	T2_TSE_cor	09:16:32	09:19:31	3	T1_TSE_sag
2017	7	Lumbar spine	sense_breast_7m_aci	56.1	13.5	69.6	51.3	4.8	18.2	0.6	11.1	67.8	CoilSurveyScan	12:17:12	12:17:19	0.1	SURVEY	12:17:24	12:17:55	0.5	CoilSurveyScan	12:19:07	12:19:12	0.1	SenseRefScan	12:19:16	12:19:25	0.1	T2_TSE_sag	12:19:28	12:24:18	4.8	T1_TSE_sag	12:24:22	12:26:36	2.2	T1_tra	12:26:46	12:29:49	3	STIR_sag	12:30:04	12:33:23	3.3	T2_TSE_DRIVE_HR_tra	12:33:25	12:39:01	5.6	3D_Spine_VIEW_T2W
2017	8	Lumbar spine	anterior	55	14	69	37.8	17.2	31.2	1.2	13.7	69.9	CoilSurveyScan	14:48:44	14:48:51	0.1	SURVEY	14:48:56	14:49:26	0.5	CoilSurveyScan	14:50:31	14:50:36	0.1	SURVEY	14:50:41	14:51:13	0.5	CoilSurveyScan	14:52:17	14:52:22	0.1	SenseRefScan	14:52:26	14:52:35	0.1	T2_TSE_sag	14:52:38	14:56:56	4.3	T2_SPIR_sag	14:56:59	15:00:28	3.5	CoilSurveyScan	15:09:17	15:09:22	0.1	SURVEY
2017	15	Lumbar spine	nvc_base	37.7	14.1	51.7	34.9	2.7	16.8	0.2	13.8	51.6	CoilSurveyScan	18:09:02	18:09:08	0.1	SURVEY	18:09:12	18:09:42	0.5	SenseRefScan	18:10:26	18:10:35	0.1	T2_TSE_sag	18:10:38	18:15:26	4.8	T2_SPIR_sag	18:15:29	18:19:19	3.8	T2_TSE_cor	18:19:21	18:21:59	2.6	T2_TSE_sag	18:22:48	18:27:30	4.7	T1_TSE_sag	18:27:33	18:31:03	3.5	T2_TSE_sag	18:31:29	18:31:54	0.4	T2_TSE_sag
2017	6	Lumbar spine	anterior	30.5	15.8	46.4	27.2	3.3	19.2	9.8	7.7	48	CoilSurveyScan	11:48:20	11:48:27	0.1	SURVEY	11:48:31	11:49:01	0.5	SURVEY	11:49:48	11:50:18	0.5	CoilSurveyScan	11:51:25	11:51:30	0.1	SenseRefScan	11:51:33	11:51:42	0.1	T2_TSE_sag	11:51:45	11:57:50	6.1	T2_SPIR_sag	11:58:16	12:02:11	3.9	T2_TSE_cor	12:02:14	12:05:39	3.4	T1_TSE_sag	12:05:42	12:09:30	3.8	T2_TSE_DRIVE_HR_tra
2017	13	Lumbar spine	sense_ankle_8_aci	36.4	16	52.4	34.9	1.5	17.5	0.2	8.2	44.8	CoilSurveyScan	17:56:24	17:56:31	0.1	SURVEY	17:56:36	17:57:06	0.5	CoilSurveyScan	17:57:45	17:57:50	0.1	SenseRefScan	17:57:53	17:58:01	0.1	T2_TSE_sag	17:58:04	18:02:21	4.3	3D_Spine_VIEW_T2W	18:02:23	18:08:56	6.5	T2_SPIR_sag	18:08:59	18:12:27	3.5	T1_TSE_sag	18:12:29	18:15:40	3.2	T2_TSE_DRIVE_HR_tra	18:15:43	18:20:24	4.7	SenseRefScan
2017	1	Lumbar spine	nvc_base	31.9	16.1	48	30.4	1.5	17.6	4.7	15.4	52	CoilSurveyScan	07:31:04	07:31:35	0.5	SURVEY	07:31:39	07:32:09	0.5	SenseRefScan	07:32:51	07:33:00	0.1	T2_TSE_sag	07:33:02	07:37:16	4.2	T2_SPIR_sag	07:37:19	07:40:47	3.5	CoilSurveyScan	07:41:00	07:41:04	0.1	SenseRefScan	07:41:08	07:41:16	0.1	T2_TSE_cor	07:41:19	07:44:01	2.7	CoilSurveyScan	07:44:02	07:44:05	0.1	3D_Spine_VIEW_T2W
2017	2	Lumbar spine	sense_ankle_8_aci	25.8	16.5	42.3	24.5	1.3	17.8	0.2	7.8	33.8	CoilSurveyScan	08:38:05	08:38:12	0.1	SURVEY	08:38:17	08:38:47	0.5	CoilSurveyScan	08:39:29	08:39:33	0.1	SenseRefScan	08:39:37	08:39:45	0.1	T2_TSE_sag	08:39:48	08:44:45	4.9	T2_SPIR_sag	08:44:47	08:48:16	3.5	T2_TSE_cor	08:48:18	08:51:21	3	T1_TSE_sag	08:51:33	08:54:43	3.2	T2_TSE_DRIVE_HR_tra	08:54:47	08:59:56	5.2	T1_TSE_tra
2017	6	Lumbar spine	anterior	26.3	16.5	42.8	23.7	2.6	19.1	5.5	16.3	48.1	CoilSurveyScan	11:24:29	11:24:35	0.1	SURVEY	11:24:40	11:24:44	0.1	SURVEY	11:24:52	11:25:09	0.3	CoilSurveyScan	11:25:19	11:25:25	0.1	SURVEY	11:25:29	11:25:59	0.5	CoilSurveyScan	11:27:31	11:27:35	0.1	SenseRefScan	11:27:39	11:27:48	0.1	T2_TSE_sag	11:27:50	11:32:06	4.3	T2_SPIR_sag	11:32:09	11:35:38	3.5	T2_TSE_cor
2017	5	Lumbar spine	anterior	112.4	16.7	129	98.2	14.1	30.8	2.8	8.4	123.5	CoilSurveyScan	10:48:37	10:48:44	0.1	SURVEY	10:48:48	10:49:18	0.5	CoilSurveyScan	10:50:39	10:50:43	0.1	SenseRefScan	10:50:48	10:50:56	0.1	T2_TSE_sag	10:50:59	10:56:22	5.4	CoilSurveyScan	10:59:28	10:59:32	0.1	SenseRefScan	10:59:36	10:59:45	0.1	T2_SPIR_sag	10:59:47	11:04:10	4.4	T2_TSE_cor	11:04:15	11:06:53	2.6	T1_TSE_sag
2017	1	Lumbar spine	posterior	26.1	17.4	43.5	24.6	1.5	18.9	3.4	7.6	37.1	CoilSurveyScan	07:28:57	07:29:28	0.5	SURVEY	07:29:32	07:30:02	0.5	SenseRefScan	07:30:43	07:30:52	0.1	T2_TSE_sag	07:30:56	07:35:21	4.4	T2_SPIR_sag	07:35:24	07:38:53	3.5	CoilSurveyScan	07:39:09	07:39:13	0.1	SenseRefScan	07:39:16	07:39:25	0.1	T2_TSE_cor	07:39:28	07:42:16	2.8	CoilSurveyScan	07:42:20	07:42:24	0.1	SenseRefScan
2017	5	Lumbar spine	anterior	48.8	17.6	66.4	44.3	4.5	22.2	2.8	16	67.6	CoilSurveyScan	12:27:51	12:27:58	0.1	SURVEY	12:28:02	12:28:32	0.5	CoilSurveyScan	12:31:58	12:32:02	0.1	SenseRefScan	12:32:05	12:32:14	0.1	T2_TSE_sag	12:32:16	12:36:33	4.3	T2_SPIR_sag	12:36:35	12:39:20	2.7	T2_SPIR_sag	12:39:27	12:43:36	4.2	T2_TSE_cor	12:43:40	12:46:17	2.6	T1_TSE_sag	12:46:20	12:49:26	3.1	T2_TSE_DRIVE_HR_tra
2017	12	Lumbar spine	nvc_base	29.5	17.7	47.2	25.5	4	21.7	0.2	12.7	42.4	CoilSurveyScan	18:06:30	18:06:37	0.1	SURVEY	18:06:41	18:07:11	0.5	SenseRefScan	18:08:31	18:08:40	0.1	T2_TSE_sag	18:08:42	18:14:17	5.6	T2_SPIR_sag	18:14:20	18:17:49	3.5	T2_TSE_cor	18:19:55	18:23:22	3.5	T1_TSE_sag	18:23:25	18:26:50	3.4	T2_TSE_DRIVE_HR_tra	18:27:00	18:31:55	4.9	T1_TSE_tra	18:32:06	18:36:01	3.9
2017	12	Lumbar spine	anterior	37.2	18	55.2	34.7	2.5	20.5	5.4	10.9	53.5	CoilSurveyScan	15:21:06	15:21:13	0.1	SURVEY	15:21:17	15:21:47	0.5	CoilSurveyScan	15:22:22	15:22:27	0.1	SenseRefScan	15:22:31	15:22:39	0.1	T2_TSE_sag	15:22:42	15:26:58	4.3	T2_SPIR_sag	15:27:00	15:30:25	3.4	T2_TSE_cor	15:30:27	15:33:05	2.6	T1_TSE_sag	15:33:08	15:36:14	3.1	T2_TSE_DRIVE_HR_tra	15:36:17	15:41:13	4.9	T1_FS_SPIR_tra
2017	11	Lumbar spine	posterior	43.9	18.1	62	36.7	7.2	25.3	3.2	12.4	59.5	CoilSurveyScan	15:16:41	15:16:49	0.1	SURVEY	15:16:53	15:17:22	0.5	CoilSurveyScan	15:20:08	15:20:16	0.1	SURVEY	15:20:21	15:20:51	0.5	CoilSurveyScan	15:21:43	15:21:48	0.1	SURVEY	15:21:52	15:22:23	0.5	CoilSurveyScan	15:23:05	15:23:10	0.1	SenseRefScan	15:23:14	15:23:22	0.1	3D_VIEW_PD	15:23:26	15:29:25	6	3D_NerveVIEW
2017	7	Lumbar spine	nvc_base	46.2	18.2	64.4	39.1	7	25.3	5.3	16.5	68	CoilSurveyScan	13:07:54	13:08:01	0.1	SURVEY	13:08:05	13:08:35	0.5	CoilSurveyScan	13:10:25	13:10:32	0.1	SURVEY	13:10:36	13:11:06	0.5	CoilSurveyScan	13:14:16	13:14:20	0.1	SenseRefScan	13:14:25	13:14:33	0.1	T2_TSE_sag	13:14:35	13:19:09	4.6	T2_SPIR_sag	13:19:11	13:23:35	4.4	T1_TSE_sag	13:23:58	13:27:04	3.1	T2_TSE_DRIVE_HR_tra
2017	6	Lumbar spine	anterior	26.7	18.5	45.2	24.7	1.9	20.5	5.4	9	41	CoilSurveyScan	13:13:53	13:14:00	0.1	SURVEY	13:14:04	13:14:34	0.5	SenseRefScan	13:15:44	13:15:53	0.1	T2_TSE_sag	13:15:55	13:20:10	4.2	T2_SPIR_sag	13:20:12	13:23:41	3.5	T2_TSE_cor	13:23:43	13:26:21	2.6	T1_TSE_sag	13:26:24	13:29:34	3.2	T2_TSE_DRIVE_HR_tra	13:29:52	13:34:48	4.9	T1_TSE_tra	13:34:51	13:38:25	3.6	T2_TSE_DRIVE_HR_tra
2017	10	Lumbar spine	nvc_base	27.6	19.5	47.2	24.7	2.9	22.4	3.8	19.2	50.6	CoilSurveyScan	16:11:03	16:11:10	0.1	SURVEY	16:11:15	16:11:45	0.5	SenseRefScan	16:12:27	16:12:36	0.1	T2_TSE_sag	16:12:39	16:17:27	4.8	T2_SPIR_sag	16:17:29	16:21:24	3.9	CoilSurveyScan	16:21:31	16:21:35	0.1	SenseRefScan	16:21:39	16:21:48	0.1	T2_TSE_cor	16:21:50	16:24:31	2.7	T1_TSE_sag	16:24:34	16:24:36	0	T1_TSE_sag
2017	6	Lumbar spine	anterior	33.8	19.5	53.3	32.3	1.5	21	7.1	11.5	52.4	CoilSurveyScan	13:09:43	13:09:50	0.1	SURVEY	13:09:54	13:10:24	0.5	CoilSurveyScan	13:10:56	13:11:00	0.1	SenseRefScan	13:11:03	13:11:12	0.1	T2_TSE_sag	13:11:14	13:15:31	4.3	T2_SPIR_sag	13:15:33	13:19:57	4.4	T1_TSE_sag	13:19:59	13:23:06	3.1	T2_TSE_cor	13:23:24	13:26:02	2.6	T2_TSE_DRIVE_HR_tra	13:26:05	13:31:14	5.2	T1_TSE_tra
2017	5	Lumbar spine	anterior	25.4	19.6	45	23.8	1.6	21.2	6	14.8	46.2	CoilSurveyScan	13:00:54	13:01:05	0.2	SURVEY	13:01:10	13:01:40	0.5	SURVEY	13:02:07	13:02:37	0.5	CoilSurveyScan	13:03:05	13:03:09	0.1	SenseRefScan	13:03:14	13:03:22	0.1	3D_Spine_VIEW_T2W	13:03:25	13:09:59	6.6	T2_SPIR_sag	13:10:02	13:13:52	3.8	T1_TSE_sag	13:13:54	13:17:24	3.5	T2_TSE_DRIVE_HR_tra	13:17:27	13:22:22	4.9	T1_TSE_tra
2017	9	Lumbar spine	nvc_base	26.3	21.6	47.9	23.1	3.3	24.9	3.1	4.2	33.6	CoilSurveyScan	13:02:56	13:03:03	0.1	SURVEY	13:03:07	13:03:37	0.5	SenseRefScan	13:05:19	13:05:28	0.1	T2_TSE_sag	13:05:31	13:09:46	4.2	T2_SPIR_sag	13:10:46	13:14:16	3.5	T2_TSE_cor	13:14:18	13:16:56	2.6	T1_TSE_sag	13:17:14	13:20:20	3.1	T2_TSE_DRIVE_HR_tra	13:20:24	13:25:19	4.9	T1_TSE_tra	13:25:22	13:29:17	3.9
2017	12	Lumbar spine	sense_breast_7m_aci	25.4	22	47.3	23.7	1.7	23.7	4.7	11.7	41.7	CoilSurveyScan	16:19:49	16:19:55	0.1	SURVEY	16:19:59	16:20:30	0.5	CoilSurveyScan	16:21:25	16:21:29	0.1	SenseRefScan	16:21:34	16:21:42	0.1	T2_TSE_sag	16:21:45	16:26:01	4.3	T2_SPIR_sag	16:26:04	16:29:32	3.5	SenseRefScan	16:29:37	16:29:46	0.1	T2_TSE_cor	16:29:48	16:32:27	2.7	T1_TSE_sag	16:32:33	16:35:43	3.2	T2_TSE_DRIVE_HR_tra
2017	11	Lumbar spine	nvc_base	36.2	22.3	58.5	33.8	2.4	24.6	1.8	20.1	58.1	CoilSurveyScan	16:07:10	16:07:16	0.1	SURVEY	16:07:21	16:07:51	0.5	CoilSurveyScan	16:08:25	16:08:30	0.1	SenseRefScan	16:08:34	16:08:42	0.1	T2_TSE_sag	16:08:45	16:13:35	4.8	T2_SPIR_sag	16:13:37	16:18:00	4.4	T1_TSE_sag	16:18:03	16:21:32	3.5	T2_TSE_DRIVE_HR_tra	16:21:35	16:26:17	4.7	T2_TSE_cor	16:26:34	16:29:12	2.6	T1_TSE_tra
2017	10	Lumbar spine	anterior	19.9	23.5	43.4	19.2	0.8	24.3	4.3	20.9	45.1	CoilSurveyScan	14:07:30	14:07:36	0.1	SURVEY	14:07:40	14:08:10	0.5	CoilSurveyScan	14:08:35	14:08:40	0.1	SenseRefScan	14:08:43	14:08:52	0.1	T2_TSE_sag	14:08:54	14:13:11	4.3	T2_SPIR_sag	14:13:14	14:16:38	3.4	T2_TSE_cor	14:16:40	14:19:18	2.6	T1_TSE_sag	14:19:21	14:22:27	3.1	T2_TSE_DRIVE_HR_tra	14:22:30	14:27:25	4.9
2017	1	Lumbar spine	posterior	24.9	24	48.9	23.8	1.1	25.1	0.4	13.2	38.5	CoilSurveyScan	07:44:21	07:44:55	0.6	SURVEY	07:44:59	07:45:29	0.5	SenseRefScan	07:46:13	07:46:22	0.1	T2_TSE_sag	07:46:25	07:50:39	4.2	T2_SPIR_sag	07:50:42	07:54:10	3.5	T2_TSE_cor	07:54:12	07:56:50	2.6	T1_TSE_sag	07:56:53	08:00:03	3.2	T2_TSE_DRIVE_HR_tra	08:00:07	08:05:16	5.2	T1_TSE_tra	08:05:19	08:09:14	3.9
2017	10	Lumbar spine	sense_breast_7m_aci	24.8	24.3	49.2	23.3	1.5	25.8	5.3	1.6	31.7	CoilSurveyScan	15:52:18	15:52:26	0.1	SURVEY	15:52:30	15:53:01	0.5	SenseRefScan	15:53:35	15:53:44	0.2	T2_TSE_sag	15:53:47	15:58:02	4.2	T2_SPIR_sag	15:58:13	16:01:42	3.5	T2_TSE_cor	16:01:45	16:04:16	2.5	T1_TSE_sag	16:04:31	16:07:42	3.2	T2_TSE_DRIVE_HR_tra	16:07:45	16:12:41	4.9	CoilSurveyScan	16:12:50	16:12:54	0.1	SenseRefScan
2017	8	Lumbar spine	nvc_base	50.9	25.3	76.2	48.1	2.8	28.1	0.5	15.9	67.3	CoilSurveyScan	16:42:28	16:42:36	0.1	SURVEY	16:42:40	16:43:11	0.5	CoilSurveyScan	16:44:17	16:44:22	0.1	SenseRefScan	16:44:25	16:44:34	0.1	T2_TSE_sag	16:44:36	16:48:53	4.3	SenseRefScan	16:48:58	16:49:22	0.4	STIR_longTE_sag	16:49:24	16:55:04	5.7	3D_Spine_VIEW_T2W	16:55:06	17:01:39	6.6	T1_TSE_sag	17:01:42	17:01:44	0	T1_TSE_sag
2017	3	Lumbar spine	posterior	70.8	25.8	96.6	63.6	7.2	33	8.7	25.5	105	CoilSurveyScan	09:20:25	09:20:31	0.1	SURVEY	09:20:36	09:21:06	0.5	SenseRefScan	09:22:25	09:22:34	0.1	T2_TSE_sag	09:22:36	09:29:25	6.8	T2_SPIR_sag	09:29:28	09:34:43	5.2	T1_TSE_sag	09:34:45	09:39:25	4.7	T2_TSE_DRIVE_HR_tra	09:39:28	09:44:08	4.7	T2_TSE_DRIVE_HR_tra	09:44:49	09:49:40	4.8	CoilSurveyScan	09:51:56	09:52:00	0.1	SURVEY
2017	13	Lumbar spine	posterior	22.9	30	52.8	21	1.8	31.8	7.1	23.4	53.4	CoilSurveyScan	16:16:18	16:16:24	0.1	SURVEY	16:16:29	16:16:59	0.5	SenseRefScan	16:17:46	16:17:55	0.1	T2_TSE_sag	16:17:59	16:23:22	5.4	T2_SPIR_sag	16:23:24	16:26:49	3.4	T2_TSE_cor	16:26:51	16:30:11	3.3	T1_TSE_sag	16:30:53	16:34:08	3.2	T2_TSE_DRIVE_HR_tra	16:34:14	16:39:10	4.9
2017	1	Lumbar spine	nvc_base	21.2	30.1	51.3	19.5	1.6	31.8	6	29.9	57.1	CoilSurveyScan	07:40:57	07:41:27	0.5	SURVEY	07:41:31	07:42:01	0.5	CoilSurveyScan	07:43:08	07:43:12	0.1	SenseRefScan	07:43:16	07:43:24	0.1	T2_TSE_sag	07:43:27	07:47:43	4.3	T2_SPIR_sag	07:47:54	07:51:18	3.4	T2_TSE_cor	07:51:21	07:53:58	2.6	T1_TSE_sag	07:54:01	07:57:07	3.1	T2_TSE_DRIVE_HR_tra	07:57:11	08:02:06	4.9
2017	3	Lumbar spine	sense_breast_7m_aci	34.3	32.5	66.8	32.4	1.9	34.4	0.5	25.1	59.9	CoilSurveyScan	09:19:10	09:19:16	0.1	SURVEY	09:19:20	09:19:50	0.5	CoilSurveyScan	09:20:28	09:20:33	0.1	SenseRefScan	09:20:37	09:20:46	0.1	T2_TSE_sag	09:20:48	09:26:12	5.4	T2_SPIR_sag	09:26:38	09:30:33	3.9	T2_TSE_cor	09:30:35	09:33:34	3	T1_TSE_sag	09:33:36	09:37:10	3.6	T2_TSE_DRIVE_HR_tra	09:37:23	09:41:50	4.5	T1_TSE_tra
2017	12	Lumbar spine	sense_knee_16_aci	8.1	35.9	44.1	7.2	0.9	36.8	5.1	30.9	44.1	CoilSurveyScan	16:50:22	16:50:29	0.1	SURVEY	16:50:34	16:51:04	0.5	CoilSurveyScan	16:51:43	16:51:47	0.1	SenseRefScan	16:51:51	16:51:59	0.1	T2_TSE_sag	16:52:02	16:56:52	4.8	T2_SPIR_sag	16:56:55	16:58:29	1.6
2017	13	Lumbar spine	nvc_base	25	36.5	61.6	24.1	0.9	37.4	0.2	2.7	27.9	CoilSurveyScan	18:17:17	18:17:24	0.1	SURVEY	18:17:28	18:17:58	0.5	SenseRefScan	18:18:31	18:18:40	0.1	T2_TSE_sag	18:18:43	18:23:31	4.8	T2_SPIR_sag	18:23:33	18:27:28	3.9	T2_TSE_cor	18:27:30	18:30:28	3	T1_TSE_sag	18:30:31	18:34:05	3.6	T2_TSE_DRIVE_HR_tra	18:34:09	18:38:50	4.7	T1_TSE_tra	18:38:53	18:42:19	3.4
2017	6	Lumbar spine	posterior	25.1	36.7	61.8	23.5	1.6	38.3	0.2	9.1	34.4	CoilSurveyScan	12:31:17	12:31:23	0.1	SURVEY	12:31:28	12:31:58	0.5	CoilSurveyScan	12:32:52	12:32:56	0.1	SenseRefScan	12:33:00	12:33:09	0.1	3D_Spine_VIEW_T2W	12:33:11	12:39:48	6.6	T2_TSE_sag	12:39:51	12:44:03	4.2	T2_SPIR_sag	12:44:27	12:47:57	3.5	T1_TSE_sag	12:47:59	12:51:09	3.2	T2_TSE_DRIVE_HR_tra	12:51:13	12:56:24	5.2
2017	7	Lumbar spine	nvc_base	21	38	59	19.2	1.8	39.8	0.9	35.4	57.3	CoilSurveyScan	13:34:43	13:34:49	0.1	SURVEY	13:34:53	13:35:23	0.5	CoilSurveyScan	13:36:28	13:36:33	0.1	SenseRefScan	13:36:37	13:36:45	0.1	T2_TSE_sag	13:36:48	13:41:04	4.3	T2_SPIR_sag	13:41:07	13:44:31	3.4	T2_TSE_cor	13:44:55	13:47:33	2.6	T1_TSE_sag	13:47:35	13:50:42	3.1	T2_TSE_DRIVE_HR_tra	13:50:45	13:55:40	4.9
2017	12	Lumbar spine	sense_ankle_8_aci	26.3	39.5	65.8	24.6	1.6	41.2	0.3	33.1	59.7	CoilSurveyScan	17:13:00	17:13:07	0.1	SURVEY	17:13:11	17:13:42	0.5	CoilSurveyScan	17:14:23	17:14:27	0.1	SenseRefScan	17:14:31	17:14:40	0.1	T2_TSE_sag	17:14:42	17:19:33	4.8	T2_SPIR_sag	17:19:35	17:23:30	3.9	T2_TSE_cor	17:24:04	17:26:42	2.6	T1_TSE_sag	17:26:46	17:30:20	3.6	T2_TSE_DRIVE_HR_tra	17:30:23	17:35:18	4.9	T1_TSE_tra
2017	4	Lumbar spine	anterior	31.4	44	75.4	29.5	1.9	45.8	0.2	43.6	75.2	CoilSurveyScan	11:12:44	11:12:51	0.1	SenseRefScan	11:12:55	11:13:04	0.1	Survey	11:13:06	11:13:54	0.8	CoilSurveyScan	11:14:42	11:14:47	0.1	SenseRefScan	11:14:51	11:14:59	0.1	Survey	11:15:02	11:15:56	0.9	CoilSurveyScan	11:16:16	11:16:20	0.1	3D_Spine_VIEW_T2W	11:16:24	11:22:57	6.5	SenseRefScan	11:23:00	11:23:24	0.4	STIR_longTE_sag
2017	12	Lumbar spine	nvc_base	18.1	57.5	75.6	14.2	3.9	61.4	0.3	57.3	75.6	CoilSurveyScan	17:21:19	17:21:25	0.1	SURVEY	17:21:30	17:22:00	0.5	CoilSurveyScan	17:22:47	17:22:52	0.1	SenseRefScan	17:22:55	17:23:03	0.1	T2_SPIR_sag	17:23:06	17:26:58	3.9	T1_KM_mDixon_TSE_sag	17:29:49	17:33:26	3.6	T1_FS_SPIR_KM_tra	17:33:29	17:39:26	5.9
2017	1	Lumbar spine	nvc_base	28.7	65.7	94.4	26.6	2.1	67.8	1.9	62.3	92.9	CoilSurveyScan	07:35:02	07:35:36	0.6	SURVEY	07:35:40	07:36:10	0.5	CoilSurveyScan	07:37:50	07:37:54	0.1	SenseRefScan	07:37:58	07:38:06	0.1	T2_TSE_sag	07:38:09	07:42:59	4.8	T2_SPIR_sag	07:43:03	07:47:03	4	T2_TSE_cor	07:47:06	07:49:43	2.6	T1_TSE_sag	07:49:46	07:53:20	3.6	T2_TSE_DRIVE_HR_tra	07:53:23	07:58:58	5.6	T1_TSE_tra
2017	5	Lumbar spine	sense_breast_7m_aci	27.7	92.6	120.3	25.9	1.9	94.5	0.3	88.5	116.5	CoilSurveyScan	11:32:06	11:32:13	0.1	SURVEY	11:32:17	11:32:41	0.4	CoilSurveyScan	11:32:43	11:32:49	0.1	SURVEY	11:32:53	11:33:23	0.5	SenseRefScan	11:34:04	11:34:13	0.1	T2_TSE_sag	11:34:15	11:39:58	5.7	T2_SPIR_sag	11:40:26	11:44:22	3.9	T2_TSE_cor	11:44:24	11:47:32	3.1	T1_TSE_sag	11:47:34	11:51:08	3.6	T2_TSE_DRIVE_HR_tra
2017	15	Shoulder	sense_knee_16_aci	18.2	0	18.2	16.9	1.3	1.3	12	14.7	44.9	CoilSurveyScan	20:18:00	20:18:13	0.2	SenseRefScan	20:18:17	20:18:26	0.2	SURVEY_RIGHT	20:18:29	20:18:51	0.4	PD_TSE_tra	20:19:49	20:23:22	3.6	T1_TSE_cor	20:23:29	20:27:22	3.9	T2_TSE_sag TE 60ms	20:27:25	20:30:28	3.1	T2_FS_SPAIR_cor	20:30:31	20:36:15	5.7
2017	3	Shoulder	sense_breast_7m_aci	22.6	5	27.6	21.4	1.3	6.3	12.5	0.5	35.7	CoilSurveyScan	09:28:31	09:28:38	0.1	SenseRefScan	09:28:42	09:28:52	0.2	SURVEY_LEFT	09:28:55	09:29:21	0.4	PD_TSE_tra	09:30:04	09:33:36	3.5	T1_TSE_cor	09:33:51	09:37:56	4.1	T1_FS_SPIR_cor	09:38:01	09:42:13	4.2	T2_TSE_sag TE 60ms	09:42:16	09:45:20	3.1	T2_FS_SPAIR_cor	09:45:24	09:51:09	5.7
2017	9	Shoulder	anterior	36.7	6	42.7	25.9	10.8	16.9	5.8	4.8	47.3	CoilSurveyScan	15:46:20	15:46:27	0.1	SenseRefScan	15:46:32	15:46:40	0.1	SURVEY_RIGHT	15:46:44	15:47:06	0.4	SURVEY_RIGHT	15:49:22	15:49:49	0.5	T1_TSE_tra	15:51:27	15:53:39	2.2	T2_TSE_tra	15:53:44	15:56:05	2.3	STIR_TSE_Tra	15:56:08	15:57:45	1.6	T1_sag	16:00:37	16:05:03	4.4	T2_TSE_sag TE 60ms	16:05:05	16:09:54	4.8	T1_KM_mDixon_tra
2017	3	Shoulder	anterior	23.9	7.5	31.4	21.1	2.8	10.3	0.7	1.1	25.7	CoilSurveyScan	09:18:34	09:18:41	0.1	SenseRefScan	09:18:45	09:18:54	0.2	SURVEY_RIGHT	09:18:57	09:19:19	0.4	PD_TSE_tra	09:21:12	09:24:46	3.6	T1_TSE_cor	09:25:11	09:29:09	4	T1_FS_SPIR_cor	09:29:11	09:33:18	4.1	T2_TSE_sag TE 60ms	09:33:35	09:36:39	3.1	T2_FS_SPAIR_cor	09:36:45	09:42:29	5.7
2017	7	Shoulder	posterior	24.6	8.3	32.9	20.5	4.1	12.4	0.2	7.2	31.9	CoilSurveyScan	14:14:12	14:14:19	0.1	SenseRefScan	14:14:24	14:14:34	0.2	SURVEY_RIGHT	14:14:36	14:14:59	0.4	PD_TSE_tra	14:16:43	14:20:17	3.6	T1_mDixon_TSE_cor	14:20:22	14:24:49	4.4	T2_TSE_sag TE 60ms	14:25:32	14:28:37	3.1	T2_mDixon_TSE_cor	14:28:41	14:33:04	4.4	T2_mDixon_TSE_cor	14:34:28	14:38:49	4.4
2017	5	Shoulder	anterior	31.1	8.6	39.7	23.9	7.3	15.8	8.7	1.9	41.7	CoilSurveyScan	10:42:06	10:42:14	0.1	SenseRefScan	10:42:19	10:42:27	0.1	SURVEY_RIGHT	10:42:31	10:42:53	0.4	SURVEY_RIGHT	10:42:58	10:43:02	0.1	STIR_TSE_Tra	10:44:31	10:46:10	1.6	T1_TSE_cor	10:48:15	10:55:55	7.7	T1_sag	10:57:10	11:01:36	4.4	T1_KM_mDixon_tra	11:03:39	11:06:47	3.1	T1_KM_mDixon_sag	11:06:58	11:13:14	6.3
2017	3	Shoulder	anterior	25.2	8.8	34	22.3	2.8	11.6	0.9	0.8	26.9	CoilSurveyScan	09:01:45	09:01:52	0.1	SenseRefScan	09:01:56	09:02:06	0.2	SURVEY_RIGHT	09:02:08	09:02:31	0.4	PD_TSE_tra	09:03:23	09:06:57	3.6	T1_TSE_cor	09:07:51	09:12:04	4.2	T1_FS_SPIR_cor	09:12:09	09:12:10	0	T1_FS_SPIR_cor	09:12:57	09:17:33	4.6	T2_TSE_sag TE 60ms	09:17:36	09:20:39	3.1	T2_FS_SPAIR_cor	09:20:43	09:26:55	6.2
2017	3	Shoulder	anterior	36.6	8.9	45.4	34.1	2.5	11.3	0.2	3.7	40.5	CoilSurveyScan	09:10:19	09:10:26	0.1	SenseRefScan	09:10:31	09:10:39	0.1	SURVEY_RIGHT	09:10:43	09:11:05	0.4	PD_TSE_tra	09:12:41	09:16:15	3.6	T1_TSE_cor	09:16:31	09:21:26	4.9	T1_FS_SPIR_cor	09:21:44	09:27:50	6.1	T1_TSE_cor	09:27:54	09:34:01	6.1	T2_TSE_sag TE 60ms	09:34:04	09:38:32	4.5	T2_FS_SPAIR_cor	09:38:36	09:46:53	8.3
2017	9	Shoulder	sense_breast_7m_aci	31.4	9.5	40.9	27.3	4.1	13.6	5.4	1	37.7	CoilSurveyScan	13:56:20	13:56:28	0.1	SenseRefScan	13:56:33	13:56:42	0.2	SURVEY_RIGHT	13:56:46	13:57:08	0.4	CoilSurveyScan	13:58:59	13:59:04	0.1	SURVEY_RIGHT	13:59:08	13:59:31	0.4	PD_TSE_tra	14:00:04	14:03:40	3.6	T1_TSE_cor	14:03:47	14:07:43	3.9	T1_FS_SPIR_cor	14:08:29	14:12:37	4.1	T2_TSE_sag TE 60ms	14:12:39	14:15:43	3.1	T2_FS_SPAIR_cor
2017	3	Shoulder	posterior	25.9	9.9	35.8	21.5	4.3	14.2	7.5	9.4	42.7	CoilSurveyScan	09:06:22	09:06:30	0.1	SenseRefScan	09:06:34	09:06:44	0.2	SURVEY_RIGHT	09:06:47	09:07:09	0.4	SenseRefScan	09:07:57	09:08:07	0.2	SURVEY_RIGHT	09:08:10	09:08:32	0.4	PD_TSE_tra	09:10:36	09:14:10	3.6	T1_TSE_cor	09:15:20	09:19:14	3.9	T1_FS_SPIR_cor	09:19:16	09:23:22	4.1	T2_TSE_sag TE 60ms	09:23:25	09:26:29	3.1	T2_FS_SPAIR_cor
2017	4	Shoulder	sense_knee_16_aci	26.5	10.3	36.7	24.6	1.8	12.1	4.1	4.8	35.4	CoilSurveyScan	09:35:05	09:35:12	0.1	SenseRefScan	09:35:16	09:35:25	0.2	SURVEY_LEFT	09:35:28	09:35:54	0.4	PD_TSE_tra	09:36:50	09:40:22	3.5	T1_TSE_cor	09:40:56	09:44:50	3.9	T1_FS_SPIR_cor	09:44:54	09:49:03	4.2	T2_TSE_sag TE 60ms	09:49:06	09:52:10	3.1	T2_FS_SPAIR_cor	09:52:14	09:57:58	5.7	PD_TSE_tra	09:58:02	10:01:32	3.5
2017	5	Shoulder	anterior	23.3	10.5	33.8	21	2.3	12.8	0.3	8.1	31.7	CoilSurveyScan	14:13:26	14:13:33	0.1	SenseRefScan	14:13:37	14:13:46	0.2	SURVEY_RIGHT	14:13:49	14:14:11	0.4	PD_TSE_tra	14:15:22	14:18:58	3.6	T1_TSE_cor	14:19:22	14:23:15	3.9	T1_FS_SPIR_cor	14:23:18	14:27:24	4.1	T2_TSE_sag TE 60ms	14:27:51	14:30:54	3.1	T2_FS_SPAIR_cor	14:30:58	14:36:42	5.7
2017	3	Shoulder	anterior	18.9	11.2	30.1	16.5	2.3	13.5	0.2	4.3	23.5	CoilSurveyScan	09:56:51	09:56:58	0.1	SenseRefScan	09:57:03	09:57:12	0.2	SURVEY_RIGHT	09:57:15	09:57:39	0.4	PD_TSE_tra	09:58:54	10:02:28	3.6	T1_TSE_cor	10:03:03	10:06:56	3.9	T2_TSE_sag TE 60ms	10:06:59	10:10:03	3.1	SenseRefScan	10:10:22	10:10:48	0.4	STIR_MARS_Cor	10:10:50	10:15:44	4.9
2017	5	Shoulder	nvc_base	40.6	11.2	51.8	32.9	7.8	18.9	0.2	7.9	48.7	CoilSurveyScan	11:41:20	11:41:28	0.1	SenseRefScan	11:41:32	11:41:41	0.1	SURVEY_RIGHT	11:41:45	11:42:07	0.4	SURVEY_RIGHT	11:42:48	11:43:11	0.4	PD_TSE_tra	11:43:55	11:47:29	3.6	STIR_TSE_Tra	11:47:34	11:51:31	4	T1_TSE_cor	11:51:34	11:55:29	3.9	T1_FS_SPIR_cor	11:55:32	11:59:06	3.6	T2_TSE_sag TE 60ms	11:59:08	12:01:30	2.4	T2_FS_SPAIR_cor
2017	7	Shoulder	nvc_base	23.3	12.1	35.3	21.2	2	14.1	4.1	5.7	33	CoilSurveyScan	13:52:41	13:52:48	0.1	SenseRefScan	13:52:52	13:53:02	0.2	SURVEY_LEFT	13:53:04	13:53:30	0.4	PD_TSE_tra	13:54:41	13:58:14	3.5	T1_TSE_cor	13:58:33	14:02:38	4.1	T1_FS_SPIR_cor	14:02:40	14:06:45	4.1	T2_TSE_sag TE 60ms	14:07:05	14:10:09	3.1	T2_FS_SPAIR_cor	14:10:13	14:15:58	5.7
2017	8	Shoulder	sense_wrist_8_aci	26.6	12.6	39.2	25	1.5	14.1	0.3	10.1	37	CoilSurveyScan	14:49:09	14:49:16	0.1	SenseRefScan	14:49:21	14:49:31	0.2	SURVEY_RIGHT	14:49:33	14:49:56	0.4	PD_TSE_tra	14:50:39	14:54:13	3.6	T1_TSE_cor	14:54:43	14:58:42	4	T1_FS_SPIR_cor	14:58:44	15:02:51	4.1	T2_TSE_sag TE 60ms	15:02:53	15:05:57	3.1	T2_FS_SPAIR_cor	15:06:02	15:11:45	5.7	T1_FS_SPIR_cor	15:11:48	15:15:44	3.9
2017	2	Shoulder	sense_knee_16_aci	39.1	12.9	52	29.8	9.3	22.2	8.2	1.2	48.5	CoilSurveyScan	08:33:36	08:33:43	0.1	SenseRefScan	08:33:47	08:33:56	0.1	SURVEY_RIGHT	08:33:58	08:34:20	0.4	T1_TSE_tra	08:37:27	08:39:11	1.7	T1_sag_TSE	08:40:57	08:45:41	4.7	T1_TSE_tra	08:45:44	08:47:26	1.7	T2_mDIXON_TSE_tra	08:47:29	08:52:11	4.7	T2_mDIXON_TSE_tra	08:52:14	08:56:42	4.5	T2_mDIXON_sag	08:57:50	09:02:14	4.4	T1_KM_mDIXON_tra
2017	8	Shoulder	anterior	17.7	14.8	32.4	15.4	2.3	17	1.5	5	24.1	CoilSurveyScan	15:12:04	15:12:11	0.1	SenseRefScan	15:12:15	15:12:26	0.2	SURVEY_RIGHT	15:12:29	15:12:51	0.4	T1_TSE_cor	15:14:27	15:18:27	4	T1_FS_SPIR_cor	15:18:54	15:23:01	4.1	T2_TSE_sag TE 60ms	15:23:04	15:26:08	3.1	T1_3D_TFE_SAG_Glenoid	15:26:11	15:29:44	3.6
2017	8	Shoulder	sense_shoulder8_dci	35.1	17.1	52.2	32.5	2.6	19.7	0.6	16.1	51.8	CoilSurveyScan	14:47:05	14:47:12	0.1	SenseRefScan	14:47:16	14:47:25	0.2	SURVEY_LEFT	14:47:28	14:47:54	0.4	PD_TSE_tra	14:48:43	14:52:14	3.5	T1_TSE_cor	14:53:04	14:57:13	4.1	PD_TSE_tra	14:57:15	15:00:46	3.5	T1_FS_SPIR_cor	15:00:50	15:05:02	4.2	T1_3D_TFE_SAG_Glenoid	15:05:05	15:08:32	3.5	T2_TSE_sag TE 60ms	15:08:34	15:11:37	3.1	T2_FS_SPAIR_cor
2017	7	Shoulder	sense_small_extr_8_aci	23.9	23.4	47.3	21.1	2.8	26.2	4.9	1.1	29.9	CoilSurveyScan	12:05:38	12:05:45	0.1	SenseRefScan	12:05:50	12:05:59	0.2	SURVEY_LEFT	12:06:02	12:06:27	0.4	PD_TSE_tra	12:08:06	12:11:38	3.5	T1_TSE_cor	12:12:32	12:16:37	4.1	T1_FS_SPIR_cor	12:16:39	12:20:38	4	T2_TSE_sag TE 60ms	12:20:40	12:23:43	3.1	T2_FS_SPAIR_cor	12:23:47	12:29:31	5.7
2017	4	Shoulder	nvc_base	23.6	26.2	49.8	18.1	5.5	31.7	9.2	7.3	40.1	CoilSurveyScan	09:19:04	09:19:11	0.1	SenseRefScan	09:19:15	09:19:25	0.2	SURVEY_RIGHT	09:19:27	09:19:50	0.4	STIR_TSE_Tra	09:21:27	09:22:41	1.2	T1_TSE_cor	09:22:58	09:26:52	3.9	STIR_TSE_Tra	09:26:55	09:29:04	2.1	T2_TSE_sag TE 60ms	09:29:06	09:32:09	3.1	T1_KM_FS_SPIR_cor	09:35:32	09:39:00	3.5	T1_KM_SPIR_sag	09:39:03	09:42:42	3.6
2017	3	Shoulder	anterior	22.7	26.4	49.1	21	1.7	28.1	7.2	11.6	41.4	CoilSurveyScan	09:05:20	09:05:27	0.1	SenseRefScan	09:05:32	09:05:41	0.2	SURVEY_RIGHT	09:05:44	09:06:06	0.4	PD_TSE_tra	09:07:24	09:10:58	3.6	T1_TSE_cor	09:11:05	09:14:59	3.9	T1_FS_SPIR_cor	09:15:01	09:19:08	4.1	T2_TSE_sag TE 60ms	09:19:10	09:22:14	3.1	T2_FS_SPAIR_cor	09:22:18	09:28:02	5.7
2017	9	Wrist joint	nvc_base	45.7	4.6	50.3	40.3	5.4	10	3.9	2.2	51.8	CoilSurveyScan	14:15:41	14:15:53	0.2	SURVEY_FullFOV_Transversal	14:15:58	14:16:06	0.1	SenseRefScan	14:16:32	14:16:43	0.2	SURVEY_RIGHT	14:16:46	14:17:21	0.6	SURVEY_RIGHT	14:18:00	14:18:36	0.6	PD_TSE_SPIR_Cor_SENSE	14:19:09	14:23:47	4.6	T1_TSE_cor	14:24:06	14:25:02	0.9	T1_TSE_cor	14:25:37	14:29:57	4.3	T1_FS_SPIR_Arthro_cor	14:30:02	14:30:27	0.4	SURVEY_RIGHT
2017	11	Wrist joint	nvc_base	32	5.2	37.3	30.1	1.9	7.2	2.6	0.6	35.2	CoilSurveyScan	14:12:51	14:13:03	0.2	SURVEY_FullFOV_Transversal	14:13:07	14:13:16	0.1	SenseRefScan	14:13:35	14:13:46	0.2	SURVEY_RIGHT	14:13:48	14:14:24	0.6	PD_TSE_SPIR_Cor_SENSE	14:15:09	14:20:44	5.6	T1_TSE_cor	14:20:51	14:25:12	4.4	PD_TSE_SPAIR_Sag	14:25:16	14:29:10	3.9	T2_FS_SPAIR_tra 2mm	14:29:32	14:34:22	4.8	T1_SE_TRA 2mm	14:34:27	14:39:07	4.7	T2_tra_oblique_2mm
2017	8	Wrist joint	nvc_base	36.2	5.2	41.5	33.9	2.3	7.5	1.3	0.5	38	CoilSurveyScan	14:28:06	14:28:18	0.2	SURVEY_FullFOV_Transversal	14:28:22	14:28:31	0.1	SenseRefScan	14:29:02	14:29:12	0.2	SURVEY_RIGHT	14:29:15	14:29:50	0.6	PD_TSE_SPIR_Cor_SENSE	14:30:33	14:30:48	0.2	PD_TSE_SPIR_Cor_SENSE	14:31:03	14:36:38	5.6	T1_TSE_cor	14:36:48	14:41:09	4.4	PD_TSE_SPAIR_Sag	14:41:14	14:45:08	3.9	T2_FS_SPAIR_tra 2mm	14:45:19	14:50:09	4.8	T1_SE_TRA 2mm
2017	9	Wrist joint	sense_shoulder8_dci	28.6	7.3	36	24.4	4.3	11.6	9.7	0.8	39.1	CoilSurveyScan	15:44:30	15:44:42	0.2	SURVEY_FullFOV_Transversal	15:44:47	15:44:55	0.1	SenseRefScan	15:45:59	15:46:10	0.2	SURVEY_RIGHT	15:46:14	15:46:48	0.6	CoilSurveyScan	15:47:38	15:47:44	0.1	SenseRefScan	15:47:48	15:47:59	0.2	SURVEY_RIGHT	15:48:02	15:48:37	0.6	PD_TSE_SPIR_Cor_SENSE	15:49:55	15:54:33	4.6	T1_TSE_cor	15:55:11	15:59:33	4.4	PD_TSE_SPAIR_Sag
2017	10	Wrist joint	sense_breast_7m_aci	36.8	7.8	44.6	31.2	5.6	13.4	2.2	7.5	46.5	CoilSurveyScan	15:42:04	15:42:16	0.2	SURVEY_FullFOV_Transversal	15:42:20	15:42:29	0.1	SenseRefScan	15:43:02	15:43:13	0.2	SURVEY_RIGHT	15:43:16	15:43:51	0.6	SURVEY_RIGHT	15:44:23	15:45:00	0.6	PD_TSE_SPIR_Cor_SENSE	15:46:23	15:51:58	5.6	T1_TSE_cor	15:52:17	15:56:39	4.4	PD_TSE_SPAIR_Sag	15:56:43	16:01:02	4.3	T2_FS_SPAIR_tra 2mm	16:01:05	16:05:54	4.8	T1_SE_TRA 2mm
2017	5	Wrist joint	sense_breast_7m_aci	41.7	8	49.7	38	3.7	11.7	9.5	1.1	52.3	CoilSurveyScan	10:19:15	10:19:27	0.2	SURVEY_FullFOV_Transversal	10:19:32	10:19:41	0.1	SenseRefScan	10:20:05	10:20:16	0.2	SURVEY_LEFT	10:20:18	10:20:51	0.6	PD_TSE_SPIR_Cor_SENSE	10:22:03	10:26:41	4.6	T1_TSE_cor	10:26:53	10:31:15	4.4	PD_TSE_SPAIR_Sag	10:31:26	10:35:21	3.9	T2_tra_oblique_2mm	10:35:24	10:37:41	2.3	T2_FS_SPAIR_tra 2mm	10:38:05	10:42:55	4.8	PD_TSE_SPIR_Cor_SENSE
2017	9	Wrist joint	nvc_base	39	8.5	47.5	35	4	12.6	0.2	7.5	46.8	CoilSurveyScan	14:42:54	14:43:05	0.2	SURVEY_FullFOV_Transversal	14:43:09	14:43:17	0.1	SenseRefScan	14:43:38	14:43:49	0.2	SURVEY_RIGHT	14:43:52	14:44:27	0.6	SURVEY_RIGHT	14:44:54	14:45:30	0.6	PD_TSE_SPIR_Cor_SENSE	14:46:06	14:50:44	4.6	T1_FS_SPIR_Arthro_cor	14:50:46	14:51:12	0.4	T1_FS_SPIR_Arthro_cor	14:51:51	14:55:10	3.3	T1_TSE_cor	14:55:18	14:59:39	4.4	PD_TSE_SPAIR_Sag
2017	3	Wrist joint	sense_breast_7m_aci	36.1	10.4	46.5	32.9	3.2	13.6	7.7	0.7	44.6	CoilSurveyScan	09:15:33	09:15:45	0.2	SURVEY_FullFOV_Transversal	09:15:50	09:15:59	0.1	SenseRefScan	09:16:38	09:16:49	0.2	SURVEY_RIGHT	09:16:51	09:17:27	0.6	SURVEY_RIGHT	09:18:07	09:18:43	0.6	PD_TSE_SPIR_Cor_SENSE	09:19:42	09:25:26	5.7	T1_TSE_cor	09:25:42	09:30:31	4.8	T1_FS_SPIR_Arthro_cor	09:30:36	09:34:21	3.8	PD_TSE_SPAIR_Sag	09:34:37	09:39:08	4.5	T2_FS_SPAIR_tra 2mm
2017	9	Wrist joint	nvc_base	32.4	10.5	42.9	30.7	1.7	12.2	5.8	10.2	48.4	CoilSurveyScan	15:01:40	15:01:52	0.2	SURVEY_FullFOV_Transversal	15:01:56	15:02:05	0.1	SenseRefScan	15:02:16	15:02:27	0.2	SURVEY_RIGHT	15:02:29	15:03:05	0.6	SURVEY_RIGHT	15:03:34	15:04:11	0.6	PD_TSE_SPIR_Cor_SENSE	15:04:33	15:09:37	5.1	T1_TSE_cor	15:09:44	15:14:20	4.6	PD_TSE_SPAIR_Sag	15:14:25	15:18:36	4.2	T2_FS_SPAIR_tra 2mm	15:18:39	15:23:28	4.8	T1_SE_TRA 2mm
2017	7	Wrist joint	anterior	35.6	11	46.5	30.6	5	15.9	0.3	10.6	46.5	CoilSurveyScan	14:02:36	14:02:48	0.2	SURVEY_FullFOV_Transversal	14:02:53	14:03:02	0.1	SenseRefScan	14:03:14	14:03:25	0.2	SURVEY_LEFT	14:03:27	14:04:01	0.6	SURVEY_LEFT	14:04:28	14:05:03	0.6	PD_TSE_SPIR_Cor_SENSE	14:07:45	14:12:25	4.7	T1_TSE_cor	14:13:21	14:17:45	4.4	PD_TSE_SPAIR_Sag	14:17:50	14:22:00	4.2	T2_tra_oblique_2mm	14:22:03	14:24:20	2.3	T2_FS_SPAIR_tra 2mm
2017	2	Wrist joint	sense_breast_7m_aci	39.8	15.5	55.3	33.6	6.2	21.7	0.2	13	52.9	CoilSurveyScan	08:46:16	08:46:27	0.2	SURVEY_FullFOV_Transversal	08:46:31	08:46:39	0.1	SenseRefScan	08:47:00	08:47:10	0.2	SURVEY_LEFT	08:47:13	08:47:45	0.5	SURVEY_LEFT	08:48:10	08:48:44	0.6	PD_TSE_SPIR_Cor_SENSE	08:50:37	08:55:19	4.7	T1_TSE_cor	08:55:36	09:00:09	4.5	PD_TSE_SPAIR_Sag	09:01:12	09:05:03	3.8	T2_FS_SPAIR_tra 2mm	09:05:06	09:09:03	4	T1_SE_TRA 2mm
2017	8	Wrist joint	nvc_base	42.8	18.3	61.1	34.9	8	26.2	2.7	12.9	58.4	CoilSurveyScan	14:04:47	14:04:58	0.2	SURVEY_FullFOV_Transversal	14:05:03	14:05:11	0.1	SenseRefScan	14:06:26	14:06:37	0.2	SURVEY_RIGHT	14:06:39	14:07:14	0.6	SURVEY_RIGHT	14:09:28	14:10:03	0.6	PD_TSE_SPIR_Cor_SENSE	14:12:34	14:17:11	4.6	T1_TSE_cor	14:17:19	14:21:40	4.4	PD_TSE_SPAIR_Sag	14:22:27	14:26:22	3.9	T2_FS_SPAIR_tra 2mm	14:26:25	14:31:32	5.1	T1_SE_TRA 2mm
2017	9	Wrist joint	sense_breast_7m_aci	66.1	22.7	88.8	56.7	9.4	32.1	5.2	14.1	85.4	CoilSurveyScan	15:51:15	15:51:22	0.1	SURVEY_FullFOV_Transversal	15:51:26	15:51:34	0.1	SenseRefScan	15:52:05	15:52:16	0.2	SURVEY_RIGHT	15:52:18	15:52:53	0.6	SURVEY_RIGHT	15:53:25	15:54:01	0.6	PD_TSE_SPIR_Cor_SENSE	15:54:41	16:00:16	5.6	T1_TSE_cor	16:00:23	16:05:10	4.8	T1_TSE_cor	16:05:14	16:05:18	0.1	CoilSurveyScan	16:09:15	16:09:20	0.1	SURVEY_FullFOV_Transversal
[truncated: 119 more columns]
